# Supplementary material
Source: PubMed Central journal article supplement (PMC10164409)
Supplement: NIHMS1895551-supplement-supplementary_materials_and_methods.pdf [file NIHMS1895551-supplement-supplementary_materials_and_methods.pdf]

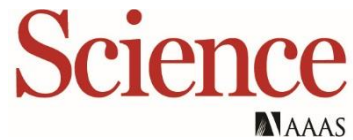

## Supplementary Materials for

### **The genetic and epigenetic landscape of the *Arabidopsis* centromeres**

Matthew Naish *et al.*

Corresponding authors: Michael C. Schatz, mschatz@cs.jhu.edu; Ian R. Henderson, irh25@cam.ac.uk

*Science* **374**, eabi7489 (2021)  
DOI: 10.1126/science.abi7489

#### **The PDF file includes:**

Materials and Methods  
Figs. S1 to S22  
Tables S1 to S8  
References

#### **Other Supplementary Material for this manuscript includes the following:**

Table S6  
MDAR Reproducibility Checklist

## **Materials and Methods**

### **Genomic DNA extraction and ONT and PacBio HiFi sequencing**

For genomic DNA extraction associated with ONT sequencing, 3 week-old Col-0 seedlings were grown on ½ MS media and 1% sucrose and kept in the dark for 48 hours prior to harvesting. Approximately 10 g of tissue was used per 200 ml of MPD-Based Extraction Buffer pH 6 (MEB). Tissue was flash frozen and ground tissue in liquid nitrogen, using a pestle and mortar, and resuspended in 200 ml MEB. Ground tissue was thawed in MEB with frequent stirring. The homogenate was forced through 4 layers of miracloth, and then filtering again through 4 layers of fresh miracloth by gravity. 20% Triton x-100 was added to a final concentration of 0.5% on ice, followed by incubation with agitation on ice for 30 minutes. The suspension was centrifuged at 800g for 20 minutes at 4°C. The supernatant was removed and the pellet resuspended using a paintbrush in 10 ml 2-methyl-2,4 pentanediol buffer pH 7.0 (MPDB). The suspension was centrifuged at 650g for 20 minutes at 4°C. The supernatant was removed and the pellet was washed with 10 ml of MPDB. Washing and centrifugation was repeated until the pellet appeared white and was finally resuspended in a minimal volume of MPDB. From this point onwards all transfers were performed using wide bore pipette tips. 5 ml CTAB buffer was added to the nuclei pellet and mixed via gentle inversion, followed by incubation at 60°C until full lysis had occurred, taking between 30 minutes and 2 hours. An equal volume of chloroform was added and incubated on a rocking platform, with a speed of 18 cycles per minute, for 30 minutes, followed by centrifugation at 3000g for 10 minutes. An equal volume of phenol/chloroform/isoamyl alcohol (PCI, 25:24:1) was added to the lysate, followed by incubation on a rocking platform (18 cycles per minute) for 30 minutes. The lysate was centrifuged at 3000g for 10 minutes and the upper aqueous phase was transferred into a fresh tube. The PCI extraction was then repeated. The extraction was then repeated using only chloroform. 1/10<sup>th</sup> volume of 3M Sodium Acetate was added to the lysate and mixed by gentle inversion. Two volumes of ice cold ethanol were added and mixed by inversion. DNA was precipitated at -20°C for 48 hours. The precipitated DNA was removed using a glass hook and washed three times in fresh 70% ethanol. The DNA was dissolved in 120 µl of 10 mM Tris-Cl (pH 8.5).

Approximately 5 µg of DNA was size selected to be >30 kbp, using the BluePippin™ Size-Selection System (Sage Science) and the 0.75% DF Marker U1 cassette definition, with Range mode and BP start set at 30,000 bp. Library preparation followed the Nanopore SQK-LSK109 protocol and kit. Approximately 1.2-1.5 µg of size-selected DNA in a volume of 48 µl was used for library preparation. DNA was nick-repaired and end-prepped by the addition of 3.5 µl of NEBNext FFPE Buffer and NEBNext Ultra II End Prep Reaction Buffer, followed by 2 µl of NEBNext DNA Repair Mix and 3 µl NEBNext Ultra II End Prep Enzyme Mix (New England Biolab, E7180S), with incubation for 30 minutes at 20°C, followed by 30 minutes at 65°C. The sample was cleaned using 1×volume AMPure XP beads and eluted in 61 µl of nuclease-free water. Adapters were ligated at room temperature using 25 µl Ligation Buffer, 10 µl NEBNext T4 DNA Ligase and 5 µl Adapter Mix for 2 hours. The library was cleaned with 0.4×volume AMPure XP beads, washed using ONT Long Fragment buffer and eluted in 15 µl elution buffer.

For genomic DNA associated with PacBio HiFi sequencing, Col-0 plants were grown at the Max Planck Institute for Plant Breeding Research, Cologne, Germany. DNA extraction (from an individual plant), library preparation and DNA sequencing was performed at the Max Planck Genome Center, Cologne, Germany. High molecular weight DNA was isolated from 1.5 gram of vegetative material with a NucleoBond HMW DNA kit (Macherey Nagel). Quality was assessed with a FEMTOpulse device (Agilent) and quantity measured by fluorometry Quantus (Promega). A HiFi library was then prepared according to the manual "Procedure & Checklist - Preparing HiFi SMRTbell® Libraries using SMRTbell Express Template Prep Kit 2.0" with initial DNA fragmentation by g-Tubes (Covaris) and final library size binning by SageELF (Sage Science). Size distribution was again controlled by FEMTOpulse (Agilent). The size-selected library was sequenced on one SMRTcell on a Sequel II device with Binding kit 2.0 and Sequel II Sequencing Kit 2.0 for 30 hours.

### **Col-CEN genome assembly**

Libraries were sequenced on 6 ONT R9 flow cells and 1 ONT R10 flow cell, and the resulting .fast5 files were basecalled with Guppy (v4.0.15), using the dna\_r9.4.1\_450bps\_hac.cfg and dna\_r10.3\_450bps\_hac.cfg configurations, respectively. This yielded a total of 73.6 Gb of sequence (~613× total coverage). The fastq files of ONT reads used for genome assembly are available for download at ArrayExpress accession E-MTAB-10272 (<http://www.ebi.ac.uk/arrayexpress/>). We trimmed adapters using Porechop (v0.2.4) and filtered for read lengths greater than 30 kbp and mean read quality scores >90%, using Filtlong (v0.2.0) (<https://github.com/rwick/Filtlong>), which yielded 436,146 reads with a mean length of 43.9 kbp (19.15 Gbp), equivalent to 161× coverage of the TAIR10 genome with ~55x coverage of ultra-long reads (>50 kbp). Flye (version 2.7) was used to assemble the reads, specifying a minimum read overlap of 10 kbp and a *k*-mer size of 17 (42).

### **Contig screen**

We performed a comprehensive contig screen using methods inspired by the Vertebrate Genomes Project (VGP), though adapted for an inbred plant genome (32). We first aligned Flye contigs to the Columbia reference chloroplast (GenBank accession NC\_000932.1) (43), and mitochondria (GenBank accession NC\_037304.1) (44) genomes with Minimap2 (v2.17-r941, -x asm5) (45). Contigs with at least 50% of their bases covered by alignments were considered to be chloroplast or mitochondria genome sequences and were removed from the assembly.

We next used BLAST to screen for contigs representing bacterial contamination. We first masked the Flye assembly with windowmasker (v1.0.0, -mk\_counts -genome\_size 131405362) (46). We then aligned the Flye contigs to all RefSeq bacterial genomes (downloaded on 2020/05/21) with megablast (v2.5.0, -outfmt "6 std score"), providing the windowmasker annotations with “-window\_masker\_db” (47). We removed BLAST alignments with an E value greater than or equal to 0.0001, a score less than 500, and a Percent Identity less than 98%, and any contigs (four in total) with remaining alignments were manually inspected. Two of the four contigs were already identified as being chloroplast or mitochondria sequence and the other two were clearly nuclear contigs, so we determined that no contigs were derived from bacterial contaminants.

After removing chloroplast and mitochondria contigs, we performed one final screen to remove contigs with low read support. We aligned ONT reads ( $\geq 40$  kbp) to the contigs with Minimap2 (v2.17-r941, -x map-ont) and removed any contigs (one in total) with more than 50% of its bases covered by fewer than 15 reads. Though we did not use its standard pipeline, we made use of `purge_dups` scripts for this analysis (48). After screening, the assembly consisted of 10 contigs with an N50 of 22,078,741 bp.

### **Contig scaffolding**

Though the five Columbia chromosomes were represented by only 10 contigs, we used homology-based scaffolding to order and orient contigs, assign chromosome labels, and orient pseudomolecules to match the orientation of TAIR10 chromosomes. We ran RagTag (v1.0.1, `--debug --aligner=nucmer --nucmer-params='--maxmatch -l 100 -c 500'`) using TAIR10 as the reference genome, but excluding ChrC and ChrM (-e) (49, 50). Three small contigs (3,200, 90,237 and 8,728 bp) consisting of low complexity sequence were not ordered and oriented and were removed from the assembly. After scaffolding, the 131,388,895 bp assembly was represented in five pseudomolecules corresponding to the five chromosomes of the Columbia genome. Chromosome 1 was gapless, while the other chromosomes contained one to four 100 bp gaps each (9 in total).

### **Initial pseudomolecule polishing and gap filling**

We corrected mis-assemblies and filled gaps in the Columbia pseudomolecules with two rounds of Medaka (v1.2.1) ONT polishing (<https://github.com/nanoporetech/medaka>). For the first round of polishing, we aligned R9 ONT reads ( $\geq 50$  kbp) to the pseudomolecules with `mini_align` (minimap2 v2.17-r941, -m). To avoid overcorrection in the centromere satellite sequences, we performed “marker-assisted filtering” to remove alignments not anchored in putatively unique sequences (6, 15) (<https://github.com/malonge/T2T-Polish>). We defined “marker” *k*-mers as 21-mers that occurred once in the assembly and between 14 and 46 times (inclusive) in the Illumina reads. The first round of polishing was completed using ``medaka consensus`` (`--model r941_min_high_g360 --batch_size 200`) and ``medaka stitch``. The second round of polishing was performed as for the first round, except we

aligned all R10 reads instead of R9 reads and the `medaka consensus` model was set to “r103\_min\_high\_g360”. As a result of ONT polishing, the assembly improved from a QV of 32.38 to 33.17 and 34.12 after the first and second rounds, respectively (17). After medaka polishing, the assembly contained only a single gap on chromosome 2.

Long-read ONT polishing was followed by short-read polishing of non-centromeres with DeepVariant (51). We first aligned Col-0 genomic DNA Illumina reads to the pseudomolecules with bwa mem (v0.7.17-r1198-dirty) and we compressed and sorted alignments with samtools (v1.10) (52, 53). We then created a VCF file of potential polishing edits with DeepVariant (v1.1.0, --model\_type=WGS), “bcftools view” (v1.11, -e 'type="ref"' -i 'QUAL>1 && (GT="AA" || GT="Aa")') and “bcftools norm”. To avoid error-prone short-read polishing in the centromeres, we used Bedtools to remove polishing edits within the centromeres and we used BCFtools to derive a final consensus FASTA file (54, 55). Though short-read polishing did not alter the centromeres, it improved the overall assembly QV to 41.4616.

### **Telomere patching**

We locally re-assembled and patched telomeric sequences for the 8 Columbia telomeres not adjacent to NORs (all but the beginning of chromosomes 2 and 4). We aligned all R9 reads to the TAIR10 reference with Winnowmap (v1.11, k=15, --MD -ax map-ont) and for each telomere, we collected all reads that aligned once to within 50 bp of the chromosome terminus (56). Using Bowtie (57) (v1.3.0, -S --all -v 0), we counted the occurrences of the telomeric repeat motif (‘CCCTAAA’) in each read, and the read with the most occurrences was designated as the “reference” and all other reads were designated as the “query”. Local re-assembly was completed by aligning the query reads to the reference read and computing a consensus with `medaka\_consensus` (v1.2.1, -m r941\_min\_high\_g360). To patch these telomere consensus sequences into the Columbia pseudomolecules, we identified the terminal BAC sequences for each of the 8 chromosome arms. For each chromosome arm, we aligned the terminal BAC sequence to the Columbia pseudomolecules and the telomere consensus sequence with Nucmer (v3.1, --maxmatch). Using these alignment coordinates, the consensus sequences were manually

patched such that everything after the terminal BAC sequence was replaced with telomere consensus sequence. Telomeres were then manually confirmed to be structurally valid.

### **Assembly curation and preparation**

After polishing and telomere patching, we performed final curation steps to correct lingering misassemblies and screen for contamination. First, while it was not straightforward to fill the remaining chromosome 2 gap *de novo*, we were able to replace the gap locus with the corresponding region in TAIR10. We found two BAC sequences flanking the gap locus that aligned concordantly to both the Col-0 pseudomolecules and TAIR10. These BAC contigs were aligned to the pseudomolecules and TAIR10 with Nucmer (v3.1, --maxmatch -l 250 -c 500) and the gap locus between the BAC contigs in the Columbia pseudomolecules was replaced with the corresponding TAIR10 locus between the BAC contigs.

To identify and correct structural mis-assemblies, we aligned Columbia long-reads to the Columbia pseudomolecules and called structural variants (SVs). First, we used Bedtools `random` (v2.29.2, -l 100000 -n 50000 -seed 23) to simulate 50,000 100 kbp exact reads from TAIR10. These reads, along with R9 ( $\geq 50$  kbp) and R10 Columbia reads were aligned to the Columbia pseudomolecules with Winnowmap (v1.11, k=15, "--MD -ax map-pb" for TAIR10 reads and "--MD -ax map-ont" for ONT reads). After compressing and sorted alignments with samtools (v1.10), Sniffles (v1.0.12, -d 100 -n -1 -s 3) was used to infer SVs from each of the alignments (58). SVs with fewer than 30% of reads supporting the ALT allele were removed and the three resulting VCF files were merged with Jasmine (v1.0.10, max\_dist=500 spec\_reads=3 --output\_genotypes) (59). There were a total of three variants called by all three read sets, including two deletions and one insertion that we corrected. REF and ALT alleles for these SVs were manually refined and validated, and ALT alleles were incorporated into the pseudomolecules using `bcftools consensus`.

Next, we manually inspected all gaps filled by Medaka and found that a 181 bp region containing a 100 bp gap on chromosome 5 was incorrectly replaced with 103 bp of sequence and we manually replaced

the filled sequence with the original gap locus. This ultimately produced the Col-CEN v1.1 assembly. We used VecScreen to do a final contamination screen. We first aligned the Columbia pseudomolecules to the VecScreen database with blastn (v2.5.0, -task blastn -reward 1 -penalty -5 -gapopen 3 -gapextend 3 -dust yes -soft\_masking true -evaluate 700 -searchsp 1750000000000 -outfmt "6 std score"). The BLAST alignments did not yield any “moderate” or “strong” matches to the database, so we determined that there was no contamination.

### **Additional polishing and generation of the Col-CEN v1.2 assembly**

To further polish the Col-CEN v1.1 assembly, we aligned all HiFi reads that were at least 16 kbp long to the Col-CEN v1.1 assembly with Winnowmap2 (v2.0, k=15 greater-than distinct=0.9998 --MD -ax map-pb) and we filtered alignments with Samtools “view” (v1.10, -F 256) (53, 56). We then used “falconc bam-filter-clipped”, a part of the IPA package, to remove chimeric read alignments (-t -F 0x104) (<https://github.com/PacificBiosciences/pbipa>). Using these filtered alignments, we polished the Col-CEN v1.1 assembly with a special branch of Racon that outputs polishing edits in VCF format (v1.6.0, -L -u) (<https://github.com/isovic/racon/tree/liftover>) (60). Polishing edits were then filtered with Merfin, using 21-mers derived from the Col-0 Illumina reads (-peak 30) (61) and incorporated into the assembly with BCFtools “consensus” (54).

To identify and correct putative larger mis-assemblies with a second, independent method, we assembled all HiFi reads at least 16 kbp long with Hifiasm (v0.15-r327, -l0), and aligned the resulting primary contigs to the Racon polished assembly with minimap2 (v2.20-r1061, --cs -cx asm5). We called variants with paf tools “call” and manually inspected all variants larger than 1 kbp in IGV (<https://github.com/lh3/minimap2/tree/master/misc>) (45). Ultimately, two sequences were inserted into the Racon assembly, ultimately producing the Col-CEN v1.2 assembly. The Col-CEN v1.2 assembly contained five pseudomolecules, two missing telomeres, and partially resolved NOR sequence at the beginning of chromosomes 2 and 4. Chromosomes 1, 3 and 5 were completely sequence resolved from telomere-to-telomere. The final Col-CEN v1.2 assembly FASTA file includes these 5 pseudomolecules and the Columbia chloroplast and mitochondria reference genomes.



To catalog variation between Col-0 lab strains, heterozygous loci, or potential lingering misassemblies, we aligned Col-0 reads to Col-CEN v1.2 and called variants. To call small variants, we aligned all HiFi reads at least 16 kbp long to the Col-CEN v1.2 assembly with Winnowmap2 (v2.0, k=15 greater-than distinct=0.9998 --MD -ax map-pb) and called variants with DeepVariant (v1.1.0, --model\_type=PACBIO). The same HiFi alignments were used to call SVs with Sniffles (v1.0.12, -d 50 -n -1 -s 10) and variants with less than 30% of reads supporting the ALT allele were removed. The same process was used to call SVs with ONT data (Winnowmap v2.0) (k=15 greater-than distinct=0.9998 --MD -ax map-ont). The resulting VCF files are available on GitHub (<https://github.com/schatzlab/Col-CEN>). During analysis, we uncovered two potentially misassembled loci, though plausible corrections were not apparent. We have listed these loci in an “issues” file on GitHub (<https://github.com/schatzlab/Col-CEN>). These, and potential future issues identified by ourselves or the community, will be considered in future assembly updates.

For assembly validation, we aligned Hi-C reads to Col-CEN with bwa mem (v0.7.17-r1198-dirty) and processed the alignments with the Arima mapping pipeline ([https://github.com/ArimaGenomics/mapping\\_pipeline](https://github.com/ArimaGenomics/mapping_pipeline)) (<http://broadinstitute.github.io/picard/>) (62). Hi-C heatmaps were made with Cooler and HiGlass (Cooler v0.8.10, 50 kbp resolution) (63) (<https://higlass.io/>).

### **Genome annotation**

Genes were lifted-over from TAIR10 with LiftOff (v1.5.1, -copies -a 1 -s 1) (64). Since ChrC and ChrM were directly copied from TAIR10, their lift-over genes were replaced with their original TAIR10 annotations. We inspected every TAIR10 gene that did not lift over to provide an explanation for the discrepancy. All presence/absence variable genes are listed in **Table S2** and all missing genes (including for reasons other than genuine biological variation) are documented on GitHub (<https://github.com/schatzlab/Col-CEN>). We also inspected every gene that lifted over in multiple

copies. All copy-number-variable genes are listed in **Table S3** and all genes that lifted over in multiple copies (including for reasons other than genuine biological variation) are listed on GitHub (<https://github.com/schatzlab/Col-CEN>). We used EDTA (v1.9.6, --sensitive 1 --anno 1 --evaluate 1) to perform *de novo* transposable element (TE) annotation, providing transcripts with "--cds" and the TAIR10 TE library with "--curatedlib" (65, 66). The TE annotation was supplemented with a manual annotation of centromere gaps using dotplot analysis and further manual annotation of the centromeric *ATHILA* elements (see section below). We used LASTZ to identify regions with similarity to 5S, 45S rDNA and the mitochondrial genome. To generate similarity heatmaps, the centromere region was divided into adjacent 5 kbp regions, which were compared using the pairwiseAlignment (type='global') and pid functions in R, using the Biostrings library. Sequences were compared in forward and reverse directions, and the highest percent sequence identity value kept. These values were then plotted in the heatmap.

### ***CEN180* repeat annotation**

To identify repetitive regions, we divided the genome assembly into adjacent 1 kbp windows. In each window, for each position, we defined 12-mers and exactly matched these sequences to the rest of the window. We identified windows where the proportion of non-unique 12-mers was greater than 10%, and merged contiguous windows that were above this threshold. For each region, we generated a histogram of the distances between 12-mers to test for periodic repeats. For example, if a region contains an arrayed tandem repeat of monomer size  $N$ , then a histogram of the 12-mer distances will show peaks at values  $N, N \times 2, N \times 3 \dots$ . The  $N$  value was obtained for each region, using the most frequent 12-mer distance. Next, 5 sequences of length  $N$  were randomly chosen from within the region and matched back to the sequence using the R function matchPattern (max.mismatch= $N/3$  with.indels=T). For each set of matches we identified overlapping repeats. If the overlap was less than 10 nucleotides, the overlap was divided at the midpoint between the repeats. If the overlap was 10 nucleotides or greater, the larger repeat was kept. The set of non-overlapping matches with the highest number was kept for further analysis. These sequence matches were aligned using mafft (--retree 2 --inputorder) (67), and a consensus repeat monomer was derived from the multiple sequence alignment. This consensus

sequence was matched back to the region using `matchPattern` (`max.mismatch=N/3` with `indels=T`), and overlaps were treated in the same way.

Our approach identified 66,131 *CEN180* repeats with a mean length of 178 bp. The set of unique *CEN180* sequences (n=22,440) were aligned using `mafft` (`--sparsescore 1000 --inputorder`) (67). A consensus sequence was generated from the multiple sequence alignment, which was:

5'-

```
AGTATAAGAACTTAAACCGCAACCCGATCTTAAAAGCCTAAGTAGTGTTTCCTTGTTAGA
AGACACAAAGCCAAAGACTCATATGGACTTTGGCTACACCATGAAAGCTTTGAGAAGCA
AGAAGAAGGTTGGTTAGTGTTTTGGAGTCGAATATGACTTGATGTCATGTGTATGATTG-
```

3'. In order to analyze *CEN180* diversity, for each position of the multiple sequence alignment (809 positions), we calculated the proportion of A, T, G, C and gaps. The alignment for each monomer at each position was then compared to these proportions and used to calculate a variant distance for the monomer. For example, if a monomer had an A in the alignment at a given position, and the overall proportion of A at that position was 0.7, the variant distance for that monomer would increase by  $1-0.7$ . This was repeated for each position of the alignment, for each monomer. This 'weighted' variant distance was used to assess how similar a given *CEN180* monomer is to the genome-wide consensus. Alternatively, to compare pairwise differences between two specific monomers, the two sequences were compared along the length of the multiple sequence alignment and each instance of disagreement counted to give a 'pairwise' variant score.

To identify higher order repeats (HORs) in a head-to-tail (tandem) orientation, each monomer was taken in turn and compared to all others using a matrix of pairwise variant scores. If a pair of monomers had a variant score of 5 or less, and were on the same strand, they were considered a match. For each match, monomers were extended by +1 unit in the same direction on the chromosome, and these were again compared for pairwise variants. This process was repeated until the next monomers had a pairwise variant score higher than threshold, or the repeats were on opposite strands, or the end of the array was reached, with these conditions defining the end of the HOR. We also searched for repeats in head-to-

head (inverted) orientation, which was identical apart from that repeats must be on opposite strands, and when monomers are extended to search for HORs, one is extended +1 position along the chromosome, whereas the other decreases -1. HORs were defined for each instance of 2 or more consecutive monomer matches. We define each HOR as consisting of block1 and block2 of *CEN180* monomers. The size of each block was recorded, in terms of monomers and base pairs, in addition to the distance between the block start coordinates. Cumulative pairwise variants per *CEN180* monomer were also calculated between each pair of blocks to provide a 'block' variant score. To measure higher order repetition of each monomer, we summed the HOR block sizes in mers, such that if a monomer was represented in three 5-mer blocks, it would score 15.

### ***ATHILA* annotation**

To resolve the sequence of the centromeric *ATHILA* elements, we used LTRharvest (68) to complement the EDTA run that was used for the annotation of all Arabidopsis TEs (see above). We ran LTRharvest three times using 'normal', 'strict' and 'very strict' parameters. The parameters were gradually adjusted to allow us to capture the full-length sequence of the *ATHILA* subfamilies, based on older studies that reported the total and LTR lengths of intact *ATHILA* elements (18). These parameters were -maxlenltr 2500 -minltrlen 400 -mindistltr 2000 -maxdistltr 20000 -similar 75 -mintsd 0 -motif TGCA -motifmis 1 for the 'normal' run; -maxlenltr 2000 -minlenltr 1000 -mindistltr 4000 -maxdistltr 16000 -similar 80 -mintsd 3 -motif TGCA -motifmis 1 for the 'strict' run; and -maxlenltr 2100 -minlenltr 1100 -mindistltr 5000 -maxdistltr 14000 -similar 85 -mintsd 4 -motif TGCA -motifmis 1 -vic 20 for the 'very strict' run. Coordinates of predicted intact elements from EDTA, LTRharvest and the manual dotplot annotation of centromeric TEs were merged and sequences aligned using mafft (69). Through these steps, we were able to pinpoint with base-pair resolution the external junctions of every *ATHILA* element, and the internal junctions of the LTRs with the internal domain (5'-LTR with PBS; PPT with 3'-LTR). Overall, we identified 111 intact elements, 53 inside and 58 outside of the centromeres, of which 43 (81%) and 40 (69%) respectively have a detectable target site duplication (TSD), 20 fragmented *ATHILA* and 12 solo LTRs (10 with a TSD, 83%) (Table S6). We further identified open reading frames (minimum 300 bp) in the internal domain of the intact elements using getorf in EMBOSS (70), and the core domains

of the *gag* and *pol* genes by running HMMER v3.3.2 (<http://hmmer.org/>) (-E 0.001 --domE 0.001) and using a collection of Hidden Markov Models (HMMs) downloaded from Pfam (<http://pfam.xfam.org/>) that describe the genes of *GYP*SY LTR retrotransposons: PF03732 for *gag*; PF13650, PF08284, PF13975 and PF09668 for protease; PF00078 for reverse transcriptase; PF17917, PF17919 and PF13456 for RNase-H; PF00665, PF13683, PF17921, PF02022, PF09337 and PF00552 for integrase; PF03078 for an *ATHILA*-specific domain. Given that many *ATHILA* subfamilies do not appear to contain the core domains of reverse transcriptase, RNase-H and integrase (Table S4), as these are described by the Pfam models, we used the full-length sequence of the intact elements to examine their phylogenetic relationships. The multiple alignment file was produced using mafft with the G-INS-i parameter (69), and FastTree (-nt) to generate the maximum likelihood tree (71). The tree was visualized and annotated with FigTree (<http://tree.bio.ed.ac.uk/software/figtree/>).

### ONT DNA methylation analysis

To identify CG, CHG and CHH methylation contexts we used DeepSignal-plant (v. 0.1) (20), which uses a deep-learning method based on bidirectional recurrent neural network (BRNN) with long short-term memory (LSTM) units to detect DNA 5mC methylation. R9 reads were filtered for length and accuracy using Filtrlong (v0.2.0) (--min\_mean\_q 90, --min\_length 30000. <https://github.com/rrwick/Filtrlong>). Basecalled read sequence was annotated onto corresponding .fast5 files, and re-squiggled using Tombo (v 1.5.1). Methylation prediction for the CG, CHG, and CHH contexts were called using DeepSignal-plant using the respective models:

model.dp2.CG.arabnrice2-1\_R9.4plus\_tem.bn13\_sn16.balance.both\_bilstm.b13\_s16\_epoch6.ckpt,

model.dp2.CHG.arabnrice2-

1\_R9.4plus\_tem.bn13\_sn16.denoise\_sig1nal\_bilstm.both\_bilstm.b13\_s16\_epoch4.ckpt

model.dp2.CHH.arabnrice2-

1\_R9.4plus\_tem.bn13\_sn16.denoise\_signal\_bilstm.both\_bilstm.b13\_s16\_epoch7.ckpt.

The script call\_modification\_frequency.py provided in the DeepSignal-plant package was then used to generate the methylation frequency at each CG, CHG and CHH site.

To identify CG methylation in Nanopore reads we also used Nanopolish (v 0.13.2), which uses a Hidden Markov model on the nanopore current signal to distinguish 5-methylcytosine from unmethylated cytosine. Reads were first filtered for length and accuracy using Filtlong (v0.2.0) (--min\_mean\_q 95, -min\_length 15000. <https://github.com/rrwick/Filtlong>). The subset was then indexed to the fast5 files, and aligned to the genome using Winnowmap (v1.11, -ax map-ont). The read fastq, alignment bam, and fast5 files were used as an input to the Nanopolish call-methylation function. The script calculate\_methylation\_frequency.py provided in the Nanopolish package was then used to generate the methylation frequency at each CG containing  $k$ -mer.

### **Bionano optical mapping**

DNA was extracted following Bionano's Plant DNA Isolation Kit (#80003) and protocol. Isolated DNA was labeled with Bionano's Direct Label and Stain Kit (DLS #80005) and samples were run on a Saphyr chip and analyzed with BionanoAccess software v1.6, Bionano Tools v1.6 and Bionano Solve v3.6\_09252020. Data generation reached 2,290 Gb equating to roughly 1,523× coverage after quality filtering for molecules containing at least 10 labels per molecule (read). *De novo* assembly of the Bionano data was performed with default assembly settings resulting in 19 contigs for a total assembly length of 132.961 Mbp. Further comparison of the Bionano contig maps was made with the Col-CEN v1.2 genome assembly. Bionano maps and molecules support the Col-CEN genome assembly where Bionano maps are capable of alignment. However, due to a lack of labelling sites, the centromere sequences generally result in breakage of the Bionano maps.

### **Chromatin immunoprecipitation and sequencing (ChIP-seq)**

Approximately 12 grams of 2 week old Col-0 seedlings were ground in liquid nitrogen. Nuclei were isolated in nuclei isolation buffer (1 M sucrose, 60 mM HEPES pH 8.0, 0.6% Triton X-100, 5 mM KCl, 5 mM MgCl<sub>2</sub>, 5 mM EDTA, 0.4 mM PMSF, 1 mM pepstatin-A, 1×protease inhibitor cocktail), and crosslinked in 1% formaldehyde at room temperature for 25 minutes. The crosslinking reaction was quenched with 125 mM glycine and incubated at room temperature for a further 25 minutes. The nuclei were purified from cellular debris via two rounds of filtration through one layer of Miracloth and

centrifuged at 2,500g for 25 minutes at 4 °C. The nuclei pellet was resuspended in EB2 buffer (0.25 M sucrose, 1% Triton X-100, 10 mM Tris-HCl pH 8.0, 10 mM MgCl<sub>2</sub>, 1 mM EDTA, 5 mM DTT, 0.1 mM PMSF, 1 mM pepstatin-A, 1×protease inhibitor cocktail) and centrifuged at 14,000g for 10 minutes at 4 °C.

The nuclei pellet was resuspended in lysis buffer (50 mM Tris-HCl pH 8.0, 1% SDS, 10 mM EDTA, 0.1 mM PMSF, 1 mM pepstatin-A) and chromatin was sonicated using a Covaris E220 evolution with the following settings: power=150V, bursts per cycle=200, duty factor=20%, time=60 seconds. Sonicated chromatin was centrifuged at 14,000g and the supernatant was extracted and diluted with 1×volume of ChIP dilution buffer (1.1% Triton X-100, 20 mM Tris-HCl pH 8.0, 167 mM NaCl, 1.1 mM EDTA, 1mM pepstatin-A, 1×protease inhibitor cocktail). The chromatin was incubated overnight at 4 °C with 50µl Protein A magnetic beads (Dynabeads, Thermo Fisher) pre-bound with either 5µl α-CENH3 (12), or α-H3K9me2 antibody (mAbcam 1220). The beads were collected on a magnetic rack and washed twice with low-salt wash buffer (150 mM NaCl, 0.1% SDS, 1% Triton X-100, 20 mM Tris-HCl pH 8.0, 2 mM EDTA, 0.4 mM PMSF, 1 mM pepstatin-A, 1×protease inhibitor cocktail) and twice with high-salt wash buffer (500 mM NaCl, 0.1% SDS, 1% Triton X-100, 20 mM Tris-HCl pH 8.0, 2 mM EDTA, 0.4 mM PMSF, 1 mM pepstatin-A, 1×protease inhibitor cocktail). Immunoprecipitated DNA–protein complexes were eluted from the beads (1% SDS, 0.1 M NaHCO<sub>3</sub>) at 65°C for 15 minutes. Samples were reverse crosslinked by incubating with 0.24 M NaCl at 65°C overnight. Proteins and RNA were digested with Proteinase K treatment, and RNase A, and DNA was purified with phenol:chloroform:isoamyl alcohol (25:24:1) extraction and ethanol precipitation. Library preparation followed the Nanopore SQK-LSK109 protocol and kit (as above) and sequenced on separate flowcell.

### **Per-read DNA methylation analysis following CENH3 and H3K9me2 ChIP and ONT sequencing**

The resulting .fast5 files were basecalled with Guppy (v5.0.11+2b6dbffa5), using the dna\_r9.4.1\_450bps\_sup.cfg and aligned to the Col-CEN reference with Winnowmap (v1.11, k=15, --MD -ax map-ont). Reads overlapping centromeric positions (Chr1: 14840000-17560000, Chr2:

3823000-6046000, Chr3: 13597000-15734000, Chr4: 4204000-6978000, Chr5: 11784000-1456000) were extracted, providing a set of 5,130 and 11,150 CENH3- or H3K9me2-associated centromeric reads, respectively. The methylation predictions for CG, CHG and CHH methylation contexts were extracted using DeepSignal-plant (v0.1) (20) within these read sets. The resulting .tsv files were filtered to remove ambiguous calls (prob\_cf=0.5) and used to calculate the mean methylation state of each context, across individual reads within both data sets. These values were then plotted in R version 4.0.0.

### **ChIP-seq and MNase-seq data alignment and processing**

Deduplicated paired-end ChIP-seq and MNase-seq Illumina reads (**Table S7**) were processed with Cutadapt v1.18 to remove adapter sequences and low-quality bases (Phred+33-scaled quality <20) (72). Trimmed reads were aligned to the Col-CEN genome assembly using Bowtie2 v2.3.4.3 with the following settings: --very-sensitive --no-mixed --no-discordant -k 10 (73). Up to 10 valid alignments were reported for each read pair. Read pairs with Bowtie2-assigned MAPQ <10 were discarded using Samtools v1.9 (53). For retained read pairs that aligned to multiple locations, with varying alignment scores, the best alignment was selected. Alignments with more than 2 mismatches or consisting of only one read in a pair were discarded. Single-end SPO11-1-oligo reads were processed and aligned to the Col-CEN assembly using an equivalent pipeline without paired-end options, as described (28). For each data set, bins per million mapped reads (BPM; equivalent to transcripts per million, TPM, for RNA-seq data) coverage values were generated in bigWig and bedGraph formats with the bamCoverage tool from deepTools v3.1.3 (74). Reads that aligned to chloroplast or mitochondrial DNA were excluded from this coverage normalization procedure.

### **RNA-seq data alignment and processing**

Paired-end RNA-seq Illumina reads (2×100 bp) (**Table S7**) (29) were processed with Trimmomatic v0.38 to remove adapter sequences and low-quality bases (Phred+33-scaled quality <3 at the beginning and end of each read, and average quality <15 in 4-base sliding windows) (28, 75). Trimmed reads were aligned to the Col-CEN genome assembly using STAR v2.7.0d with the following settings: --outFilterMultimapNmax 100 --winAnchorMultimapNmax 100 --outMultimapperOrder Random --outFilterMismatchNmax 2 --outSAMattributes All --twopassMode Basic --twopass1readsN -1 (76).



Read pairs with STAR-assigned MAPQ <3 were discarded using Samtools v1.9 (53). For retained read pairs that aligned to multiple locations, with varying alignment scores, the best alignment was selected. Alignments with more than 2 mismatches, or consisting of only one read in a pair, were discarded.

### **Small RNA-seq data alignment and processing**

Small RNA-seq Illumina reads (**Table S7**) (29) were processed with BBDuk from BBMap v38.22 (77) to remove ribosomal sequences, and with Cutadapt v1.18 (72) to remove adapter sequences and low-quality bases (Phred+33-scaled quality <20). Trimmed reads were aligned to the Col-CEN genome assembly using Bowtie v1.2.2, allowing no mismatches (57). For reads that aligned to multiple locations, with varying alignment scores, the best alignment was selected. For each small RNA size class (18–26 nucleotides), TPM values in adjacent genomic windows were calculated based on the total retained alignments (across all size classes) in the library.

### **Bisulfite sequencing data alignment and processing**

Paired-end bisulfite sequencing Illumina reads (2×90 bp) (**Table S7**) (29) were processed with Trim Galore v0.6.4 to remove sequencing adapters, low-quality bases (Phred+33-scaled quality <20) and 3 bases from the 5' end of each read (78). Trimmed reads were aligned to the Col-CEN assembly using Bismark v0.20.0 (79). Read pairs that aligned equally well to more than one location and duplicate alignments were discarded. Methylated cytosine calls in CG, CHG and CHH sequence contexts were extracted and context-specific DNA methylation proportions were generated in bedGraph and bigWig formats using the bismark2bedGraph and UCSC bedGraphToBigWig tools. DNA methylation proportions for cytosines covered by <6 reads were excluded. Single-end bisulfite sequencing reads (50 bp) (**Table S7**) (21, 22) were processed and aligned to the Col-CEN assembly using an equivalent pipeline without paired-end options.

### **Fine-scale profiling around feature sets**

Fine-scale profiles around *CEN180* (n=66,131), randomly positioned loci of the same number and width distribution (n=66,131), centromeric intact *ATHILA* elements (n=53), *ATHILA* elements located outside

the centromeres (n=58), and *GYPY* retrotransposons (n=3,979) were calculated for ChIP-seq, RNA-seq, small RNA-seq and bisulfite-seq data sets by providing the above-described bigWig files to the computeMatrix tool from deepTools v3.1.3 in ‘scale-regions’ mode (74). Each feature was divided into non-overlapping, proportionally scaled windows between start and end coordinates, and flanking regions were divided into 10-bp windows. Mean values for each data set were calculated within each window, generating a matrix of profiles in which each row represents a feature with flanking regions and each column a window. Coverage profiles for a ChIP input sequencing library and a gDNA library (Table S7) were used in conjunction with those for ChIP-seq and SPO11-1-oligo libraries, respectively, to calculate windowed  $\log_2([\text{ChIP}+1]/[\text{control}+1])$  coverage ratios for each feature. Meta-profiles (windowed means and 95% confidence intervals) for each group of features were calculated and plotted using the feature profiles in R version 4.0.0.

### **Crossover mapping**

Total data from 96 Col×Ler genomic DNA F<sub>2</sub> sequencing libraries (2×150 bp) were aligned to the Col-CEN assembly using bowtie2 (default settings). Polymorphisms were identified using the alignment files with samtools mpileup (-vu -f) and bcftools call (-mv -Oz). The resulting polymorphisms were filtered for SNPs (n=522,112), which was used as the ‘complete’ polymorphism set in TIGER. These SNPs were additionally filtered by, (i) removing SNPs with a quality score less than 200, (ii) removing SNPs where total coverage was greater than 300, or less than 50, (iii) removing SNPs that had reference allele coverage less than 20 or greater than 150, (iv) removing SNPs that had variant allele coverage greater than 130, (v) masking SNPs that overlapped transposon and repeat annotations and (vi) masking SNPs within the main *CEN180* arrays. This resulted in a ‘filtered’ set of 248,695 SNPs for use in TIGER. DNA sequencing data from 260 wild type Col×Ler F<sub>2</sub> genomic DNA (192 from ArrayExpress E-MTAB-4657 and 68 from E-MTAB-6577) was aligned to the Col-CEN assembly using bowtie2 (default settings) and the alignment analyzed at the previously defined ‘complete’ SNPs using samtools mpileup (-vu -f) and bcftools call (-m -T). These sites were used as an input to TIGER, which identifies crossover positions by genotype transitions (80). A total of 2,080 crossovers were identified with a mean resolution of 1,047 bp.

### **Epitope tagging of V5-DMC1**

The *DMC1* promoter region was PCR amplified from Col-0 genomic DNA using the Dmc1-PstI-fw and Dmc1-SphI-rev oligonucleotides. The remainder of the *DMC1* promoter, gene and terminator were amplified with oligonucleotides Dmc1-SphI-fw and Dmc1-NotI-rev. The resulting PCR fragments were digested with *PstI* and *SphI*, or *SphI* and *NotI*, respectively, and cloned into *PstI-NotI*-digested pGreen0029 vector to yield a pGreen-DMC1 construct. To insert 3 N-terminal V5 epitope tags, first two fragments were amplified with DMC1-Nco-F and 3N-V5-R and 3N-V5-F and Dmc1-Spe-rev and then used in an overlap PCR reaction using the DMC1-Nco-F and Dmc1-Spe-rev oligonucleotides. The PCR product resulting from the overlap PCR was digested with *NcoI* and *SpeI* and cloned into *NcoI*- and *SpeI*-digested pGreen-DMC1. The resulting binary vector was used to transform *dmc1-3/+* heterozygotes (SAIL\_126\_F07). We used *dmc1-seq11* and Dmc1-Spe-rev oligonucleotides to amplify wild type *DMC1* allele and Dmc1-Spe-rev and LA27 to amplify the *dmc1-3* T-DNA mutant allele. The presence of the *V5-DMC1* transgene was detected with N-screen-F and N-screen-R oligonucleotides. This oligonucleotide pair amplifies a 74 bp product in Col and a 203 bp product in *V5-DMC1*. To identify *dmc1-3* homozygotes in the presence of *V5-DMC1* transgenes, we used DMC1-genot-compl-F and DMC1-genot-compl-R oligonucleotides, which allowed us to distinguish between the wild type *DMC1* gene and *V5-DMC1* transgene. All oligonucleotide sequences are provided in **Table S8**.

### **Cytogenetic and immunocytological analyses**

For fluorescence *in situ* hybridization (FISH), spreads of meiotic chromosomes at pachytene stage of meiosis were prepared from young flower buds fixed in ethanol:acetic acid (3:1) and stored in 70% ethanol until use. Chromosome spreads were prepared as described (81). To identify individual chromosome arms, chromosome-specific *A. thaliana* BAC clones were arranged into contigs. More specifically, the following BAC contigs were used: five (F10C21/AC051630 – F12K21/AC023279; **Fig. 1D, 1F, S5A and S5D**), 15 (F13M18/AL087094 – F12K21/AC023279; **Fig. S5C and S5E**) or 29

(F6F9/AC007797 – F12K21/AC023279; **Fig. S5B**) chromosome 1 upper-arm-specific BACs; five (F2J6/AC009526 – T2P3/B21868; **Fig. 1D** and **S5A**) or 36 (F2J6/AC009526 – T6H22/AC009894; **Fig. S5B**) chromosome 1 bottom-arm-specific BACs; five (T21B4/AF007271 – T8M17/AF296835; **Fig. S5A**) or 29 (T20O7/AB026660 – T8M17/AF296835; **Fig. 3H** and **S5E**) chromosome 5 upper-arm-specific BACs; five (F5M8/AL082902 – T31G3/AB026662; **Fig. S5A**) chromosome 5 bottom-arm-specific BACs. The Arabidopsis (TTTAGGG)<sub>n</sub> telomere repeat probe was prepared by PCR, as described (82). All DNA probes were labeled with biotin-dUTP, digoxigenin-dUTP, or Cy3-dUTP by nick translation, then pooled, ethanol-precipitated and pipetted on pepsin-treated and ethanol-dehydrated slides containing suitable chromosome spreads. The slides were heated to 80°C for 2 minutes and incubated at 37°C for 12 hours. The hapten-labeled probes were immuno-detected as described (81). BAC contigs and other DNA probes were visualised using fluorescently labeled antibodies against biotin-dUTP (avidin-Texas red, Vector Laboratories, cat. no. A-2006-5) and digoxigenin-dUTP (mouse anti-digoxigenin, Jackson ImmunoResearch, 200-002-156, goat anti-mouse Alexa Fluor 488, Invitrogen, A11001, and goat anti-mouse Alexa Fluor 647, Invitrogen, A21235). Chromosomes were counterstained with DAPI (2 µg/mL) in Vectashield (Vector Laboratories). Fluorescence signals were analyzed and imaged using a Zeiss AxioImager epifluorescence microscope (Carl Zeiss) with a CoolCube camera (MetaSystems). Images were acquired separately using the Isis software (MetaSystems) for all four fluorochromes using appropriate excitation and emission filters (AHF Analysentechnik). The four monochromatic images were pseudocoloured, merged, and cropped using Photoshop CS (Adobe Systems), and chromosome length was measured using ImageJ (National Institutes of Health).

The *CEN180* pAL FISH probe, which labels all centromeres, was amplified using primers ATH\_cen180F and ATH\_cen180R (**Table S8**) (83). PCR amplification was performed as follows: initial denaturation at 95°C for 5 minutes; 35 cycles of denaturation at 95°C for 20 seconds, annealing at 46°C for 20 seconds and extension at 72°C for 20 seconds; and a final extension at 72°C for 5 minutes. PCR products were purified using the NucleoSpin Gel and PCR Clean-up kit (Macherey-Nagel) and labelled by nick translation. To design *CEN180* probes specific to individual chromosomes or sets of

chromosomes, *CEN180* sequences identified in the Col-CEN assembly were aligned using MAFFT (v7.450) and used to identify repeats with high copy number and distributions biased to specific chromosomes. Oligonucleotide FISH probes homologous to specific *CEN180* sequences were designed that were 60 nucleotides in length, with a GC content between 30-50% and selected to minimize self-annealing and formation of hairpin structures, using Geneious (v11.1.5) (**Table S8**). Double-stranded DNA probes were prepared and labelled, as described (81).

To design FISH probes against *ATHILA* transposons the sequences encoding the highly variable GAG domains for each sub-family were aligned using MAFFT (v7.450) and consensus sequences were generated. PCR primers were then designed to amplify subfamily GAG domain genes, using Primer3 (v2.3.7) implemented in Geneious (**Table S8**). PCR amplification was performed as follows: initial denaturation at 95°C for 5 minutes; 35 cycles of denaturation at 95°C for 20 seconds, annealing at 58°C for 20 seconds and extension at 72°C for 20 seconds; and a final extension at 72°C for 5 minutes. PCR products were purified using the NucleoSpin Gel and PCR Clean-up kit and subsequently cloned into the pGEM-T Easy Vector System (Promega), using TOP10 competent cells. Positive colonies were screened using SP6/T7 primers and five clones of each *ATHILA*-GAG gene were Sanger sequenced. Subsequently, clones with the highest pairwise sequence similarity to specific *ATHILA* sub-family consensus sequences were used as templates for PCR amplification. Purified PCR products were labelled by nick translation, as described (81).

For analysis of chromatin during mitotic interphase, nuclei were isolated from 1 week old seedlings (wild type Col-0 and CENH3-GFP (84)) and treated as described (24). Primary antibodies were diluted 1:200 while the secondary antibodies Alexa488 and Alexa555 goat anti rabbit or goat anti mouse conjugates (Molecular Probes) were diluted 1:500. The primary antibodies used were anti-GFP (mouse, Roche 11814460001), anti-H3K4me1 (rabbit, Abcam Ab8895), anti-H3K4me3 (rabbit, Abcam Ab8580), anti-H3K9me1 (rabbit, Abcam Ab8896), anti-H3K9me2 (mouse, Abcam Ab1220), anti-H3K27me1 (rabbit, Abcam Ab194688), anti-H3K27me3 (rabbit, Sigma Aldrich 07-449) and anti-K36me3 (rabbit, Abcam Ab9050). To visualize DNA, nuclei were mounted in Vectashield containing DAPI. Images were acquired with the LSM980 Axio Observer with the Airyscan2 detector from Zeiss.

Images were Airscan processed using the Zen Black software. Images were further analyzed using Fiji software. To correct for 3D shifts between channels in the Z plane, differences between the channels were estimated by imaging fluorescent beads. The channels were then aligned to correct for this shift. Areas of interest were resliced in Image J to obtain line plots. Intensity plots were then made using the ggplot2 package in R 3.5.1.

To immunocytologically analyse meiosis, fresh buds at floral stage 8 and 9 were dissected to release the anthers that contain male meiocytes (85). Chromosome spreads of meiotic and mitotic cells from anthers were performed, followed by immunofluorescent staining of proteins as described (26). The antibodies used in this study were:  $\alpha$ -ZYP1 (rabbit, 1/500 dilution) (86),  $\alpha$ -H3K9me2 (mouse, 1/200 dilution) (Abcam, ab1220),  $\alpha$ -CENH3 (rabbit, 1/100 dilution) (Abcam, ab72001) and  $\alpha$ -V5 (chicken, 1/200 dilution) (Abcam, ab9113). Chromosomes stained with ZYP1, CENH3 and H3K9me2 were visualized with a DeltaVision Personal DV microscope (Applied Precision/GE Healthcare). Chromosomes stained with DMC1-V5 and CENH3 were visualized with a Leica SP8 confocal microscope. Chromosomes stained with H3K9me2 were visualized with a Stimulated emission depletion nanoscopy mounted on an inverted IX71 Olympus microscope.

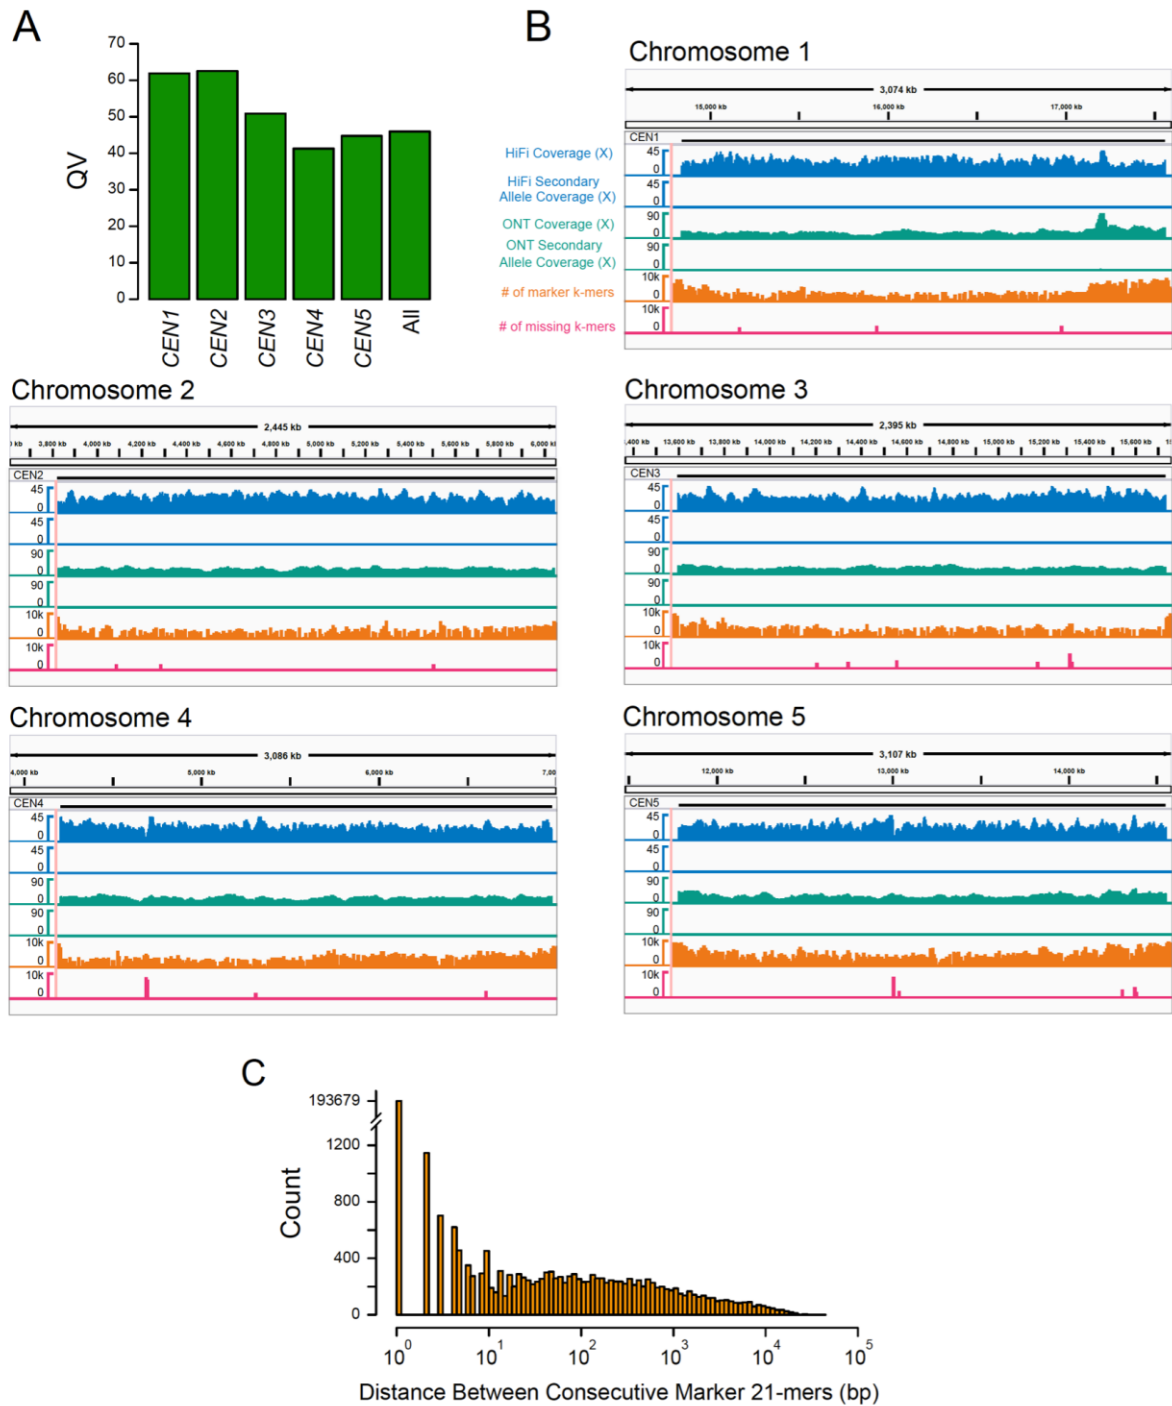

**Figure S1. Validation of the Col-CEN centromere assembly.** **A.** Assembly consensus quality (QV) scores of the individual and collective (All) centromeres. **B.** IGV screenshots depicting quantitative tracks across the five centromeres. All coverage tracks are binned via averaging, whereas the marker and missing k-mer tracks are aggregated in 10 kbp windows with no IGV binning. Secondary Allele Coverage tracks depict the coverage of the most covered alternate sequence (if any) indicated by the

alignments at every position. The “marker” and “missing” k-mer tracks are plotted with a y-axis log scale. C. Distribution of distances (bp) between consecutive marker 21-mers.



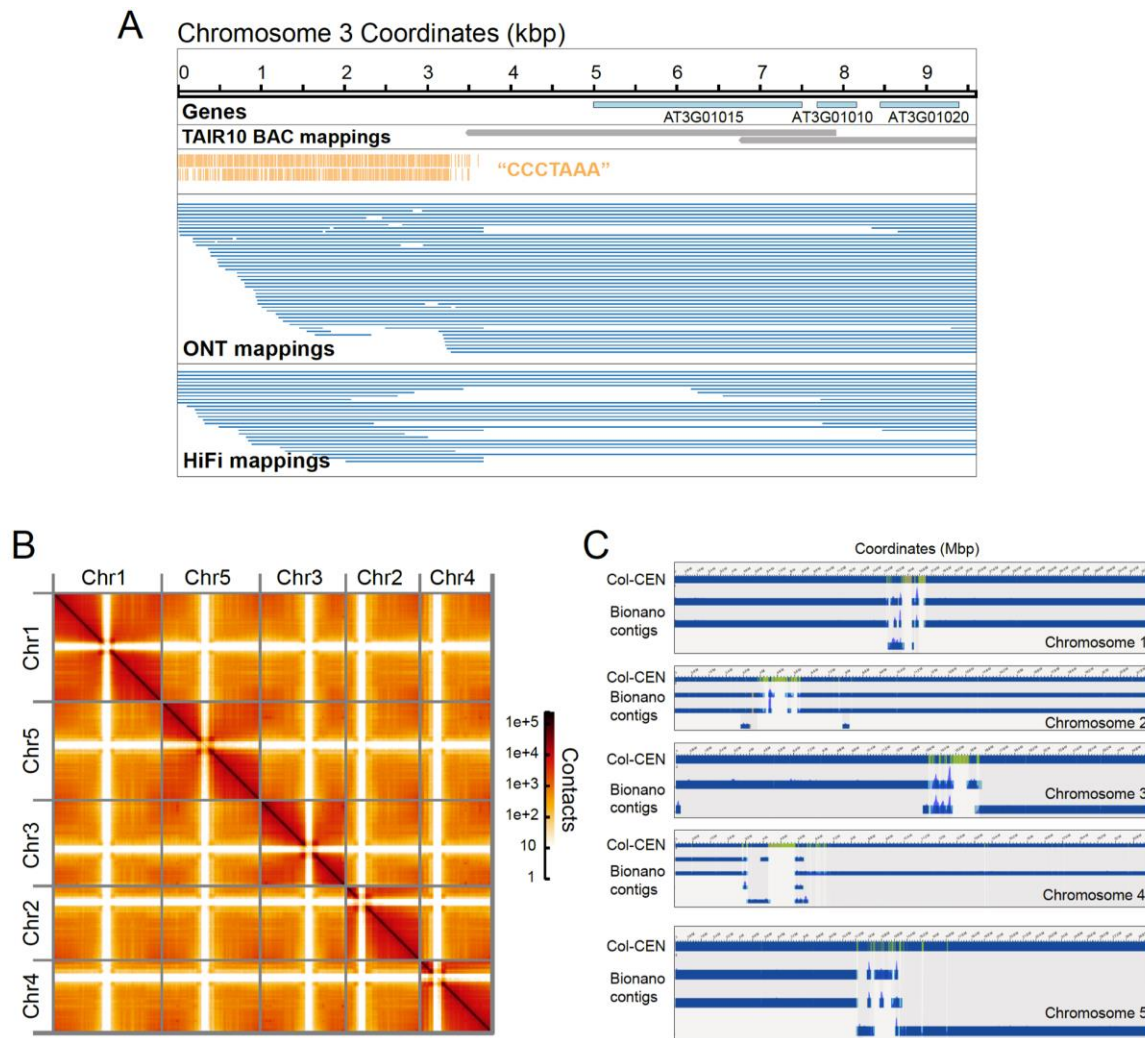

**Figure S2. Telomere assembly and validation of the Col-CEN assembly using Bionano and Hi-C data.** **A.** IGV screenshot showing the start of Col-CEN chromosome 3, including the assembled telomere. Gene models and mapped TAIR10 BACs are indicated, in addition to matches to the telomeric repeat (orange, CCCTAAA). Also shown in blue are ONT and HiFi read mappings to the Col-CEN assembly. **B.** A Hi-C heatmap generated by aligning Col-0 Hi-C reads to the Col-CEN assembly (90). **C.** Bionano *de novo* assembly contigs were mapped to the Col-CEN reference assembly. The green and blue bars represent the expected labeling positions in the ONT reference assembly, where blue bars are expected labeling positions, green regions lack Bionano labels and light brown bars represent predicted labeling positions not linked to a Bionano optical contig. Centromere regions generally lack predicted labeling sequences and therefore Bionano *de novo* assembled contigs are broken.

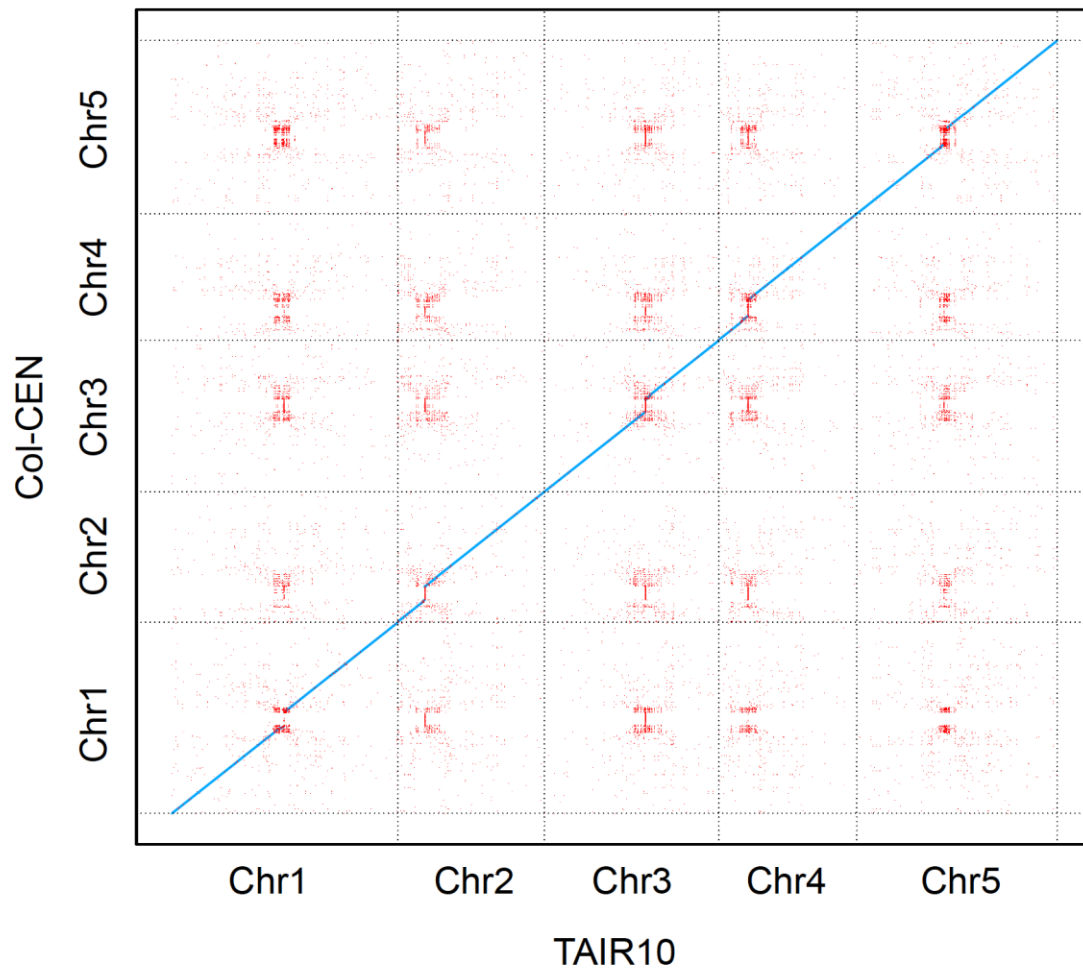

**Figure S3. Dotplot sequence similarity comparison of TAIR10 and the Col-CEN genome assembly.** A dotplot depicting unique (blue) and repetitive (red) Nucmer alignments (`--maxmatch -l 50 -c 250`) between TAIR10 and Col-CEN.

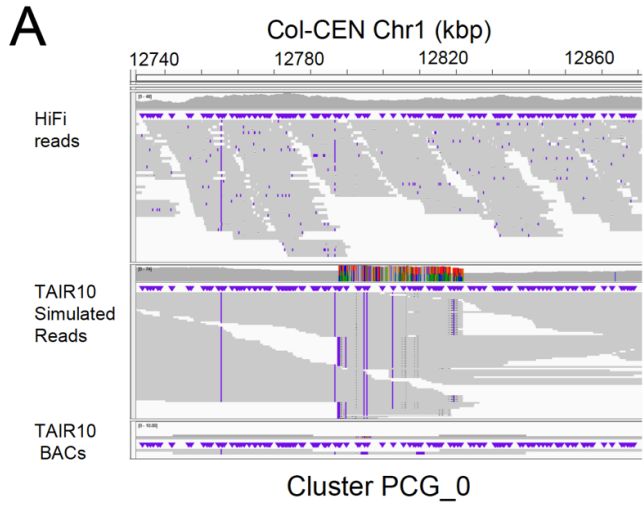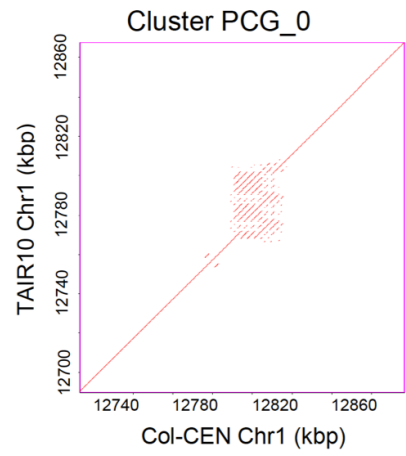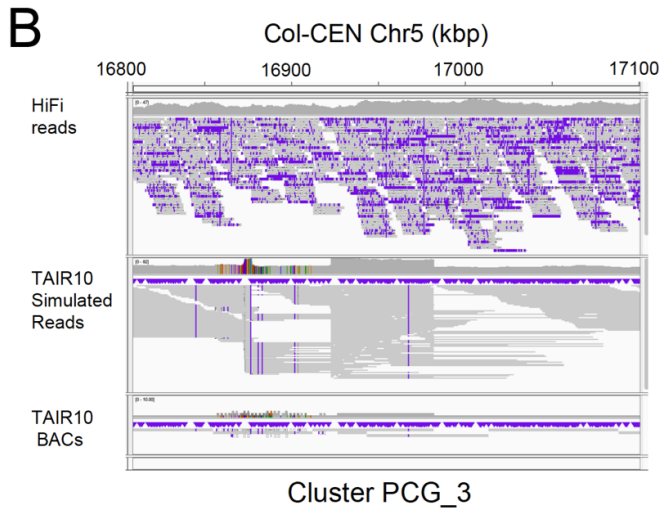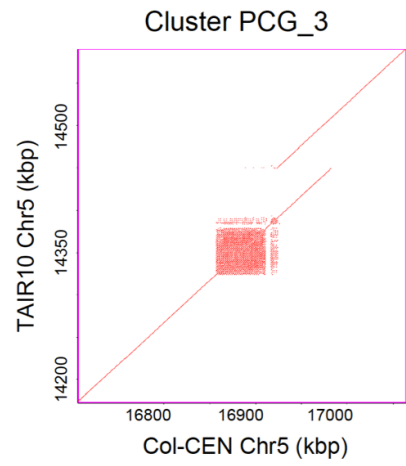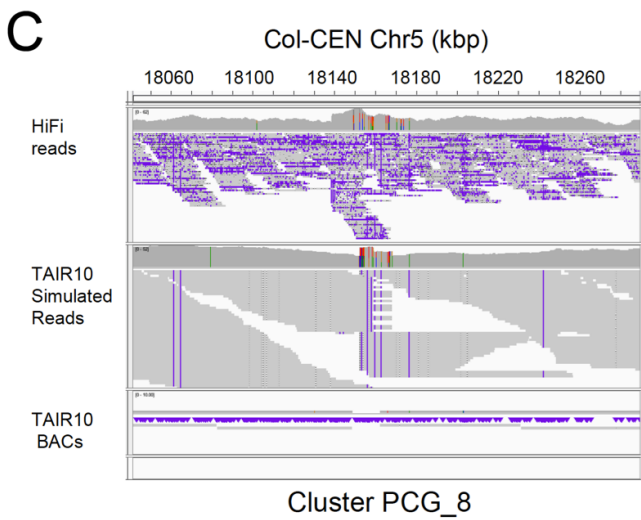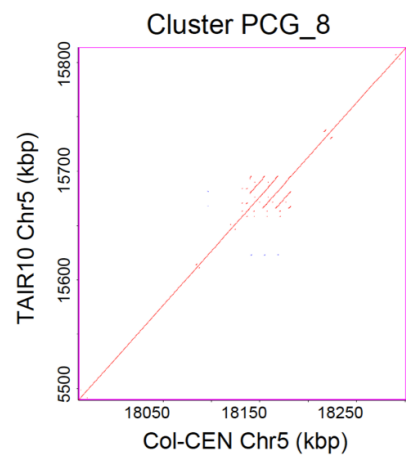

**Figure S4. Genic copy number variation loci between the TAIR10 and Col-CEN assemblies. A.**

On the left is an IGV screenshot showing a region of chromosome 1 from the Col-CEN assembly that contains a thionin gene cluster that shows a deletion relative to TAIR10 with 4 genes that did not map to Col-CEN (Cluster PCG\_0, see **Table S2**). The screenshot shows alignment of PacBio Hifi reads (upper track). Below, 100 kbp exact WGS reads were simulated from TAIR10 and their alignments are shown (middle track). Finally, TAIR10 BAC contig alignments are shown (lower). Purple marks indicate insertions and additional colors in the coverage tracks indicate substitutions. Uneven TAIR10 simulated read and BAC contig coverage indicates a structural difference between TAIR10 and Col-CEN at this locus, yet uniform HiFi coverage supports Col-CEN assembly accuracy, suggesting that this discrepancy is due to genuine biological variation, rather than misassembly. To the right a dotplot of the PCG\_0 cluster in Col-CEN versus TAIR10 is shown. **B.** As for A., but showing Cluster PCG\_3 on chromosome 5, where 8 TAIR10 genes did not map to Col-CEN (see **Table 2**). **C.** As for A., but showing Cluster PCG\_8 on chromosome 5, where 3 TAIR10 genes mapped with an extra copy to Col-CEN (see **Table 3**).

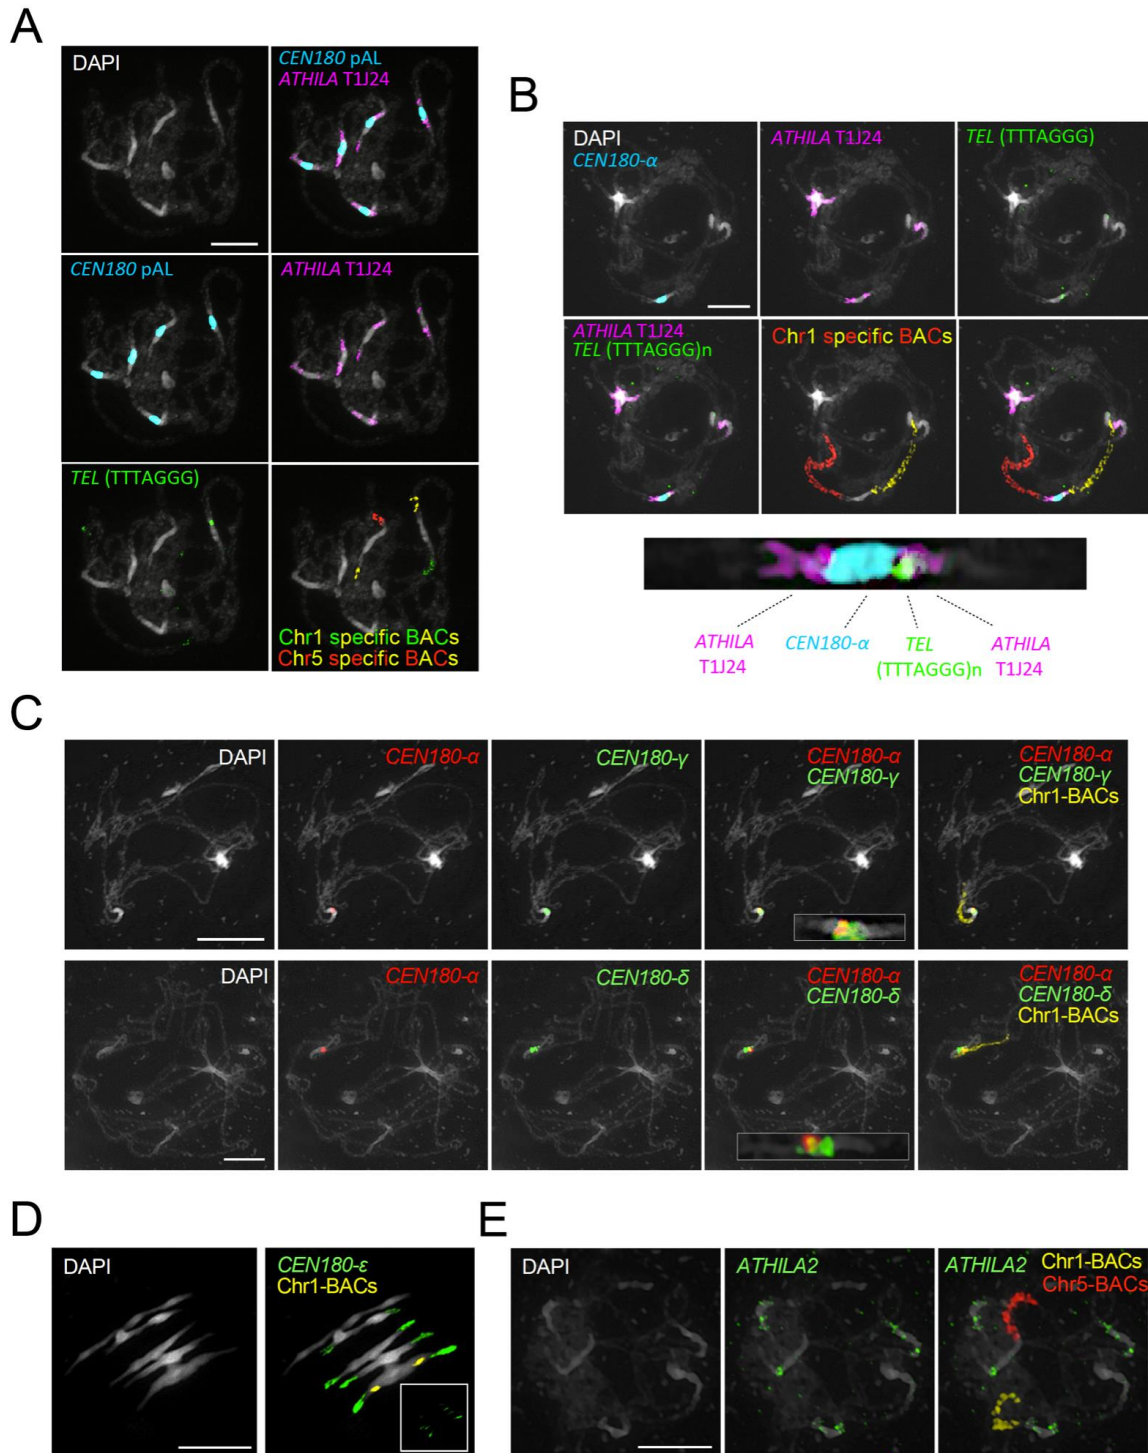

**Figure S5. Fluorescent *in situ* hybridization (FISH) analysis of the Arabidopsis centromeres. A.** Pachytene-stage meiotic chromosomes were spread and stained with DAPI (white), and FISH performed using probes designed to label all *CEN180* (blue, pAL), pericentromeric *ATHILA* (purple, BAC T1J24), the telomeric repeat (green, *TEL* (TTTAGGG)<sub>n</sub>), chromosome 1 specific BACs (yellow and green) and chromosome 5 specific BACs (red and yellow). The scale bar represents 10 μM. **B.** As

for A., apart from the *CEN180-α* probe (blue) was used for FISH, together with chromosome 1 specific BACs labelled in red and yellow. A blow-up of centromere 1 is shown beneath. **C.** As for A., but labelling with the *CEN180-α* (red), *CEN180-γ* (green) and *CEN180-δ* (green) FISH probes, together with chromosome 1 specific BACs (yellow). Blow-ups of the centromere 1 region are shown inset. **D.** A cell dividing at metaphase I of meiosis is shown that was stained by DAPI (white), and the *CEN180-ε* FISH probe (green). **E.** As for A, but labelling with an *ATHILA2* subfamily specific *GAG* probe (green) and chromosome 1 (yellow) and 5 (red) specific BACs.

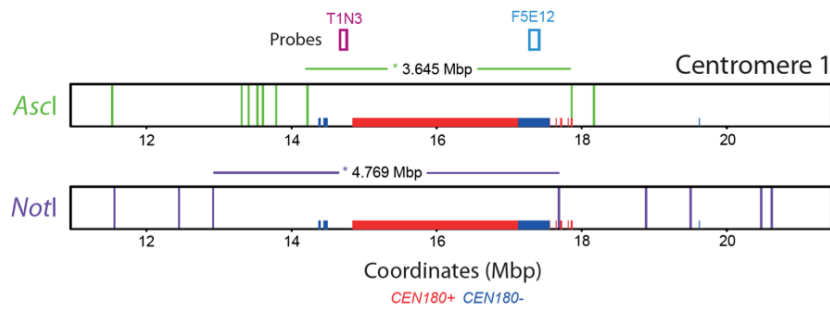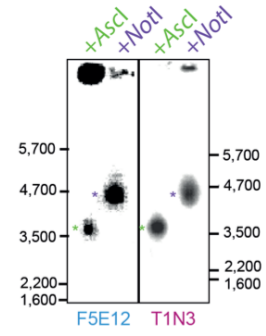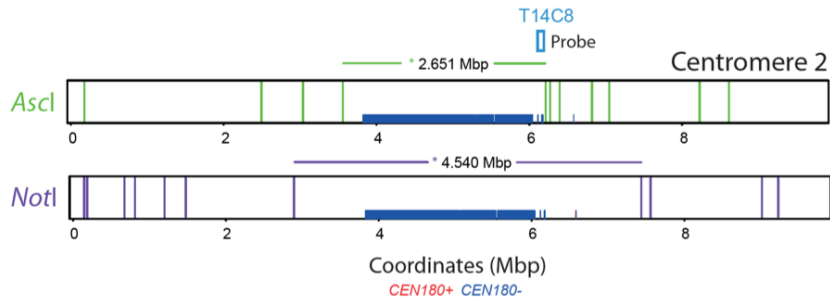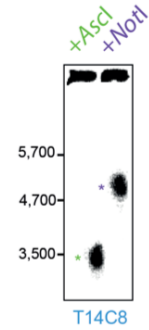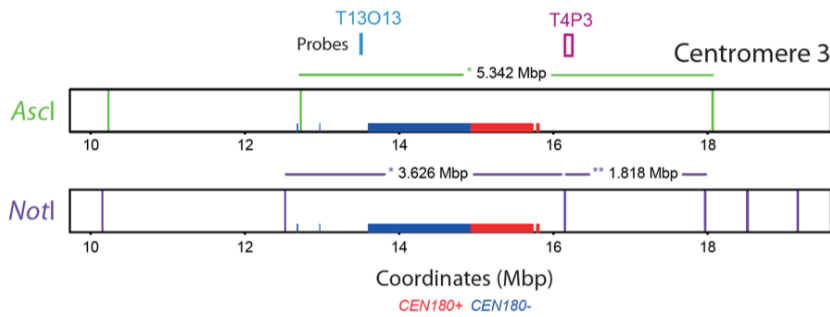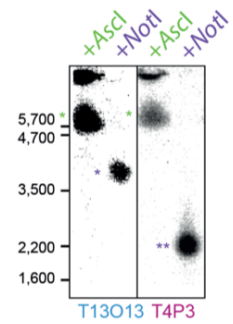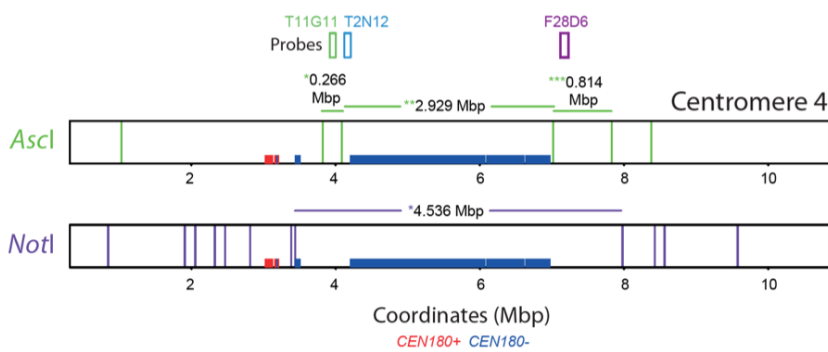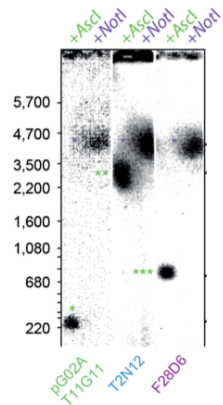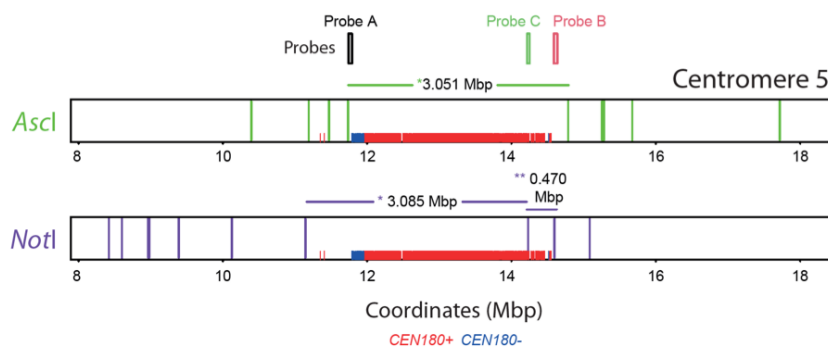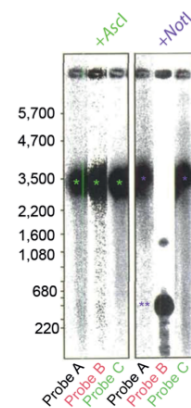

**Figure S6. Comparison of the Col-CEN assembly with physical maps derived from pulsed-field gel electrophoresis and Southern blotting.** On the right hand side of the figure published pulsed-field gel electrophoresis and Southern blotting data are shown, where genomic DNA was digested using either *AscI* or *NotI* (16, 91, 92). The probe used for hybridization is labelled underneath the blots. To the left are physical maps of the Col-CEN assembly that have been virtually digested for *AscI* (green) or *NotI* (purple) and site locations indicated relative to chromosome coordinates. The position of plus strand (red) and minus strand (blue) *CEN180* are indicated on the x axis. Above each physical map the location of the probes used for Southern blot hybridization are indicated. We further annotate the predicted size of cross-hybridizing fragments following restriction digestion, for comparison with the reproduced data. We note that for *CEN1* the authors interpret probe hybridization as indicating binding to two separate ~4.7 Mbp arrays. However, an incorrect BAC sequence used when designing the restriction maps (specifically, BAC F8L2 sequence: <https://www.ncbi.nlm.nih.gov/nucore/AC087569>) predicted an incorrect *NotI* site, which was inside of the *AscI* cutting site. However, based on analysis of our assembly the *NotI* site is in fact outside of the *AscI* site and thus the probes are binding to the same fragment (16). This region has now also been resolved correctly in the TAIR10 reference assembly.



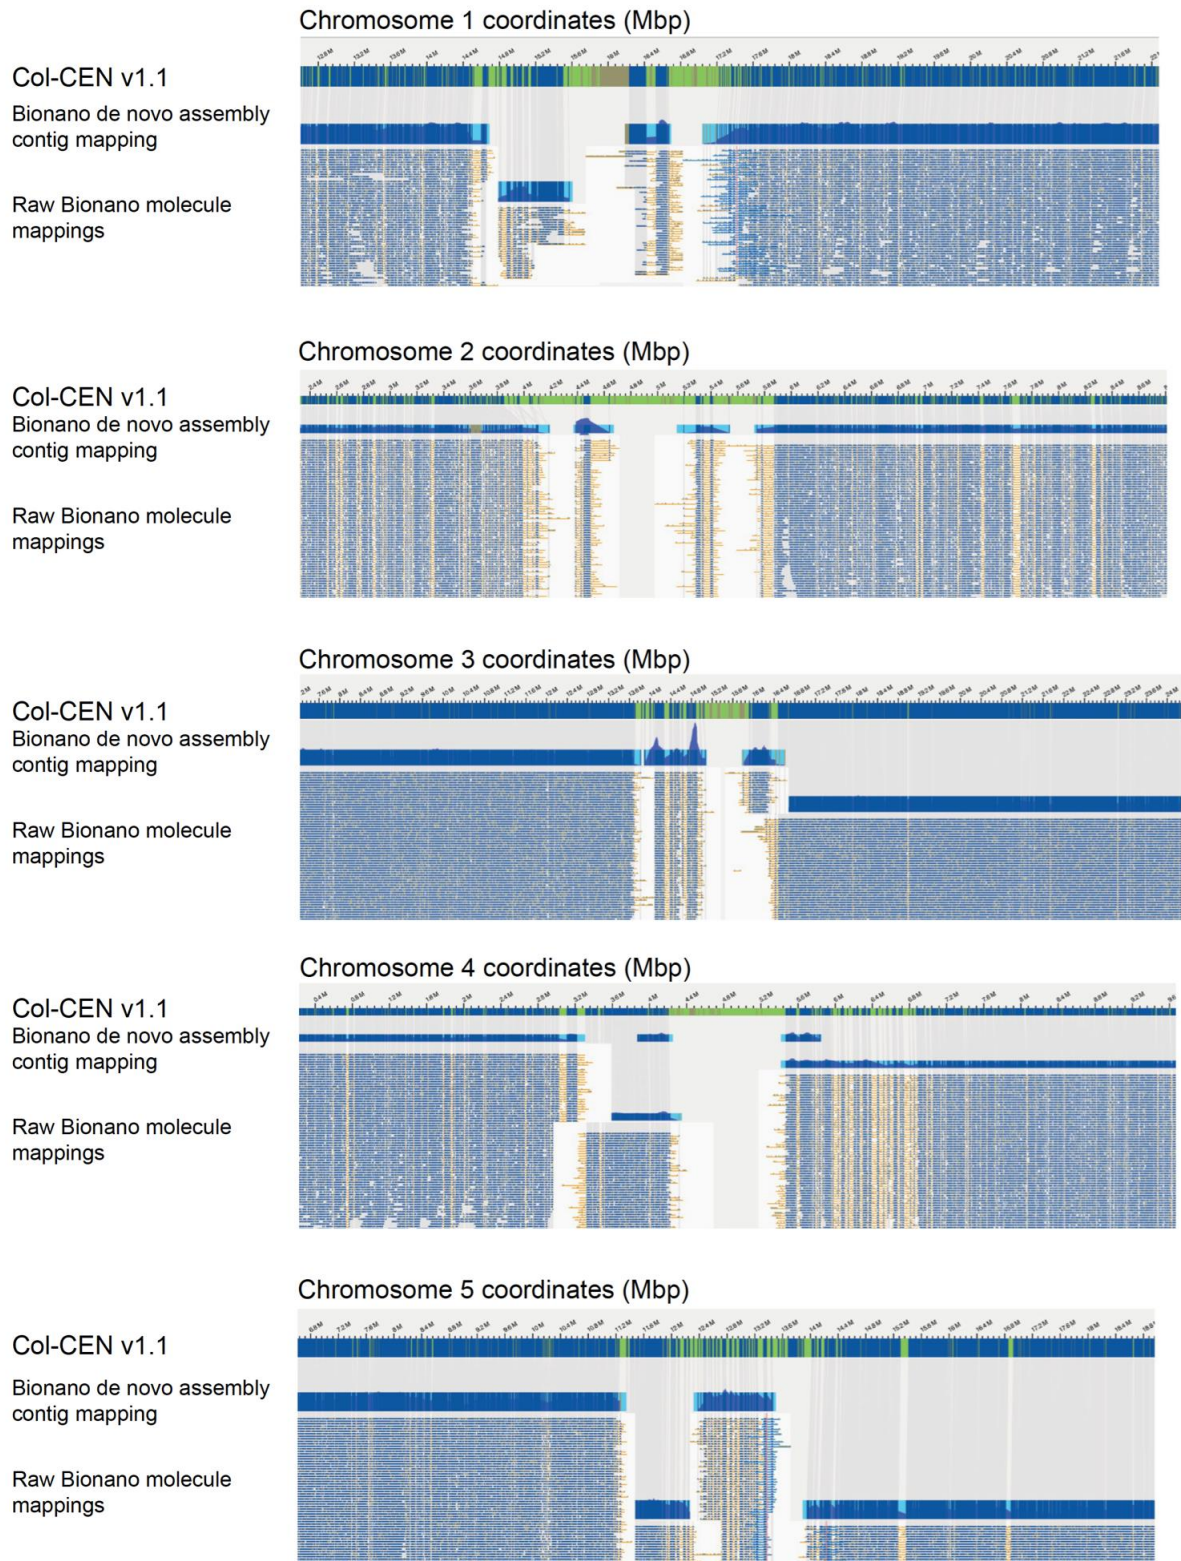

**Figure S7. Bionano optical mapping across the Col-0 centromeres.** Bionano *de novo* assembly contigs mapped to the Col-CEN reference assembly. The green and blue bars represent the expected labeling positions in the ONT reference assembly, where blue bars are expected labeling positions,

green regions lack Bionano labels and light brown bars represent predicted labeling positions not linked to a Bionano optical contig. Centromere regions generally lack predicted labeling sequences and therefore Bionano *de novo* assembled contigs are broken. Below the Bionano contigs (blue background with blue bars) are raw molecule mappings to the Bionano contigs at ~1,000× coverage (yellow background with blue dots indicating labelled sites).

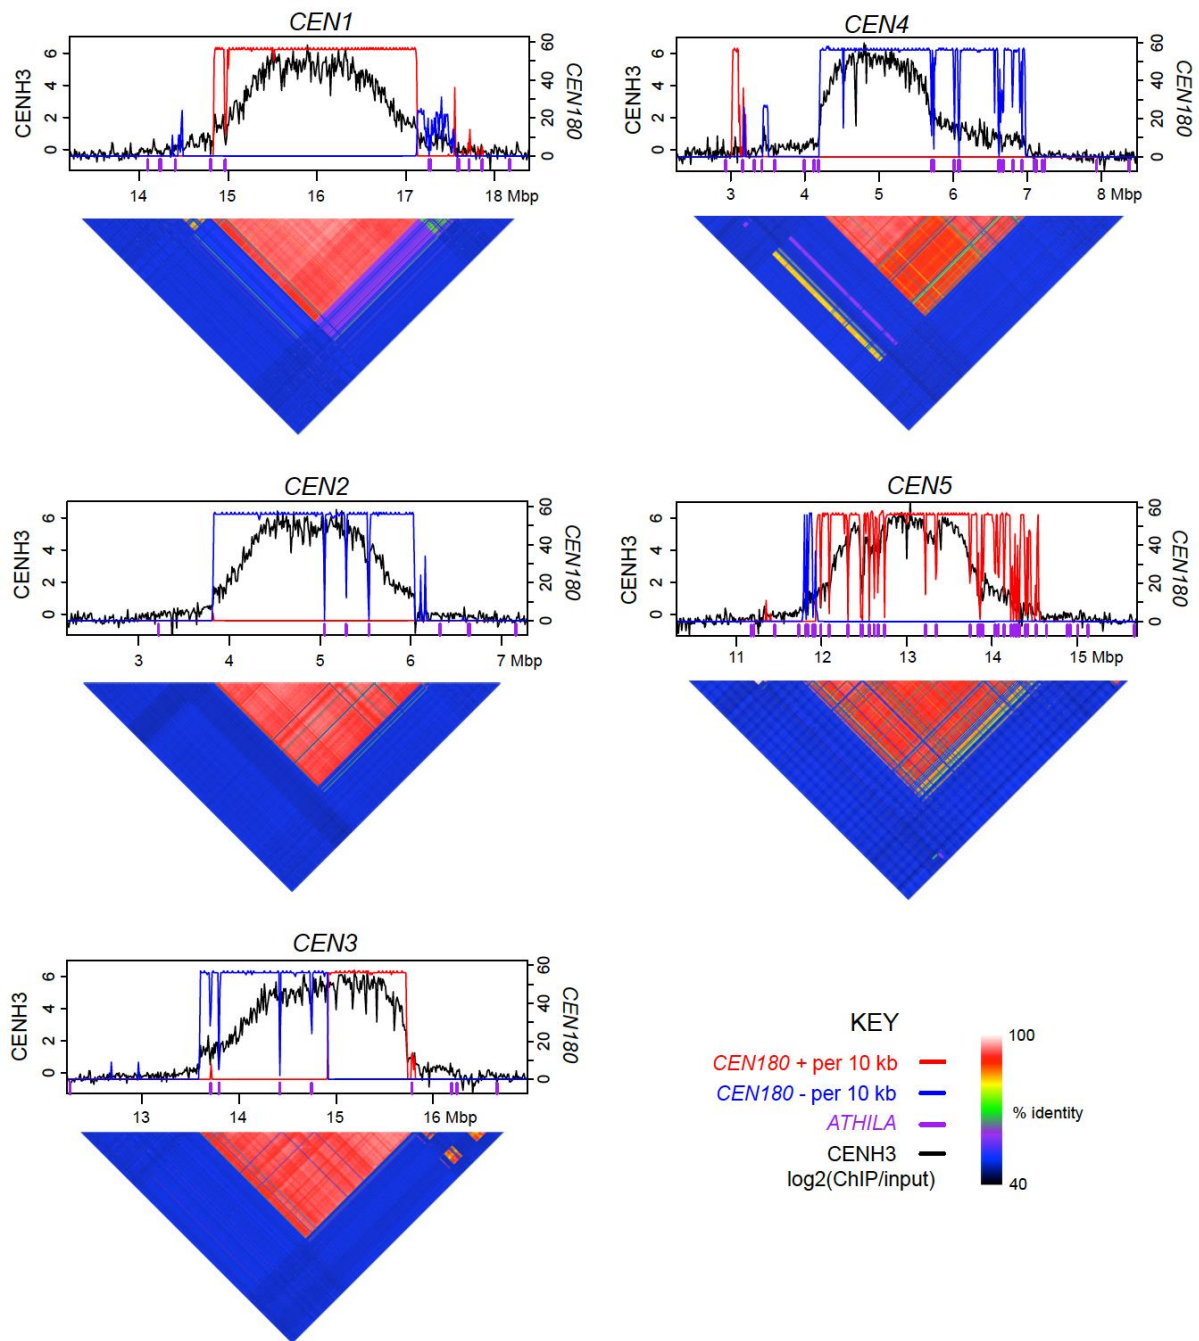

**Figure S8. CENH3, *CEN180* and sequence identity across the Arabidopsis centromeres.** CENH3  $\log_2(\text{ChIP}/\text{input})$  (black) (10), plotted over each centromere. *CEN180* density per 10 kbp is plotted showing forward (red) or reverse (blue) strand orientation. The location of *ATHILA* retrotransposons is indicated by purple ticks on the x axis. Beneath the plot are heatmaps indicating pairwise % identity values of all non-overlapping 5 kbp regions.

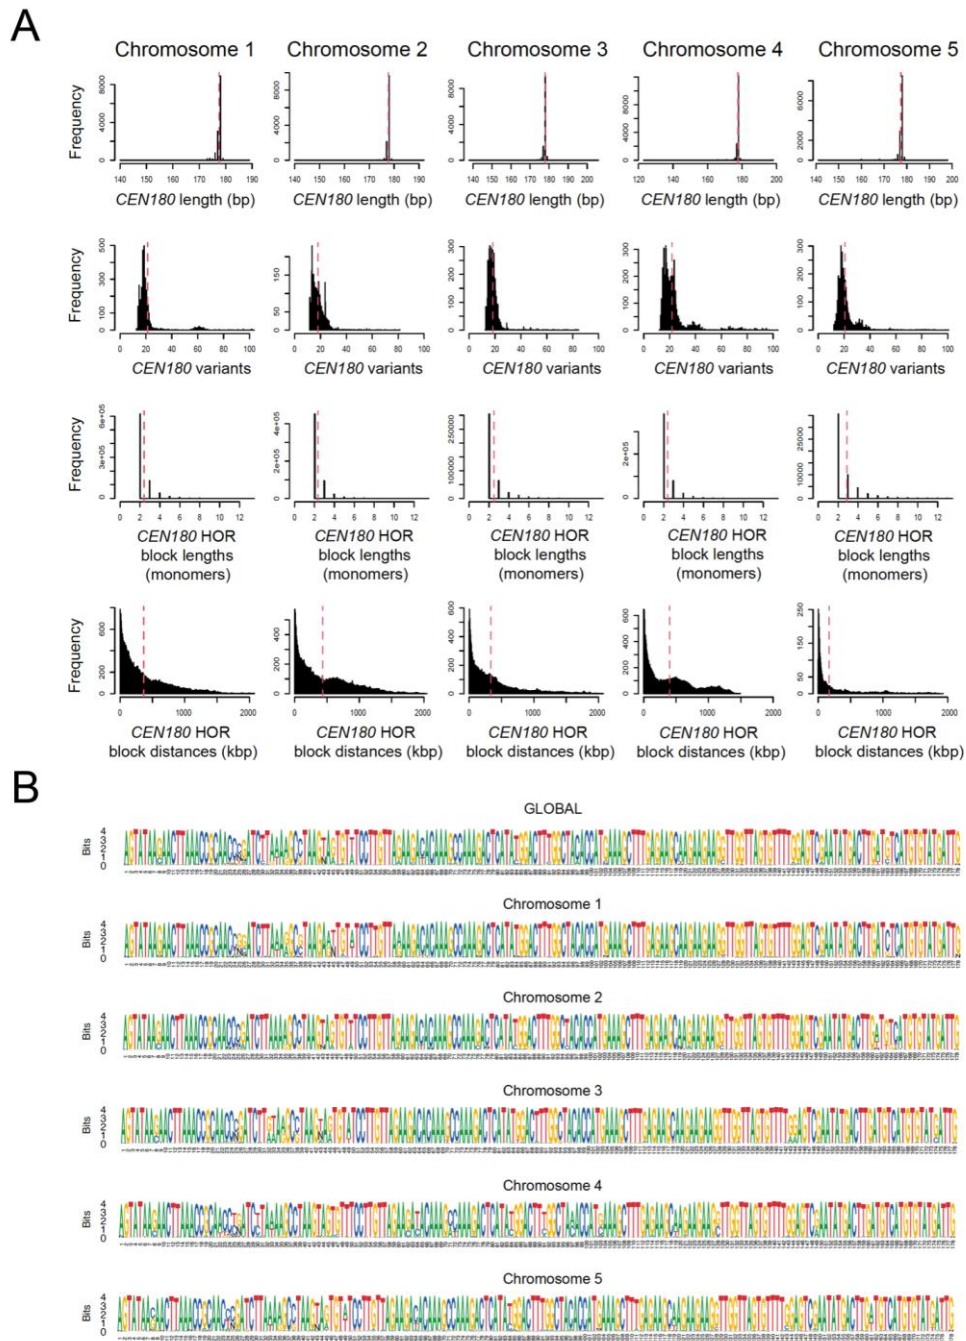

**Figure S9. The Arabidopsis *CEN180* satellite repeat library analysed by chromosome. A.** Histograms of *CEN180* monomer lengths (bp), and variants relative to the genome-wide consensus, shown for each chromosome. Mean values are shown by the red dotted line. **B.** *CEN180* sequence conservation represented by sequence logo plots. The global genome-wide sequence logo is shown first, followed by each individual chromosome. Positions with less than 50% coverage are not shown.

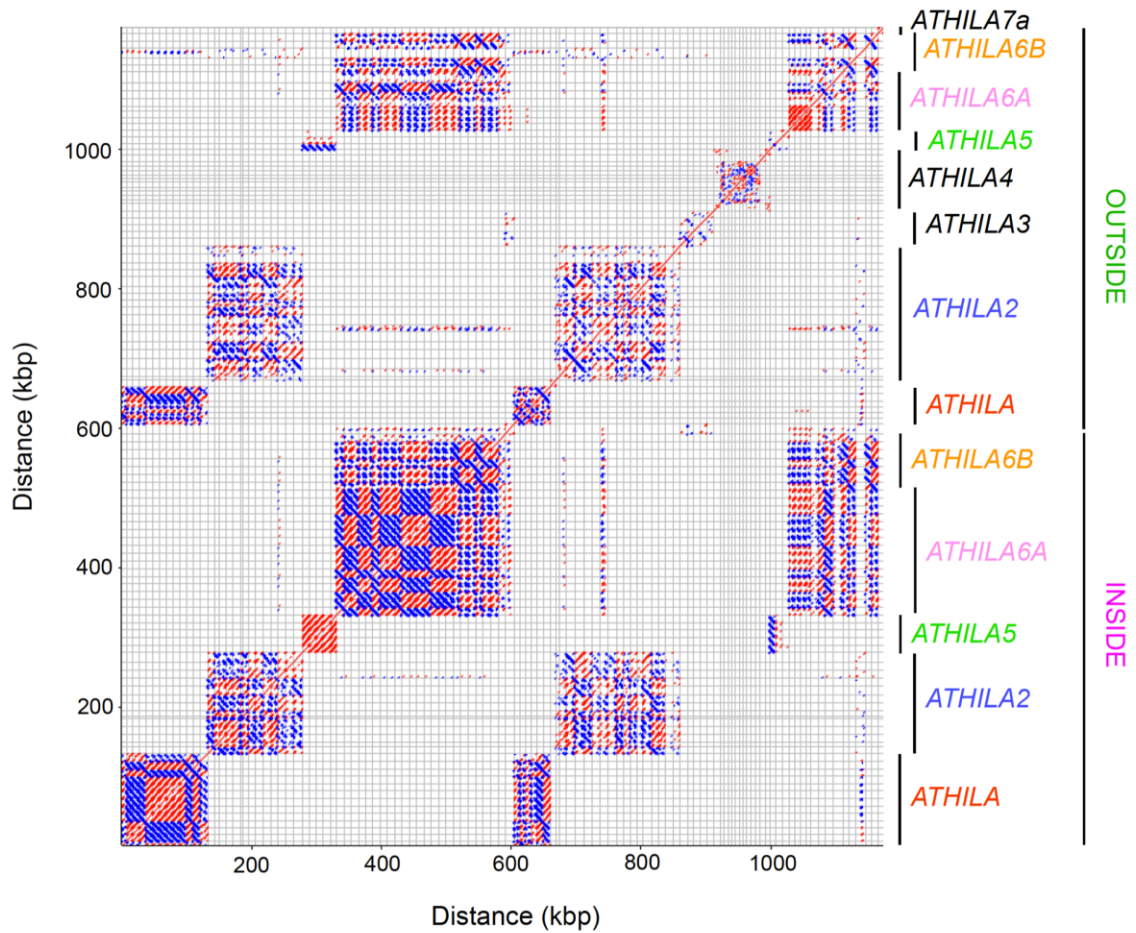

**Figure S10. Dotplot comparison of *ATHILA* retrotransposons located inside or outside the main centromeric *CEN180* arrays.** Dotplot of centromeric *ATHILA* retrotransposons using a search window of 75 bp. Red and blue indicate forward and reverse strand similarity. The elements assigned to different *ATHILA* subfamilies are indicated, in addition to whether they are located inside or outside the main centromeric *CEN180* arrays.

**A**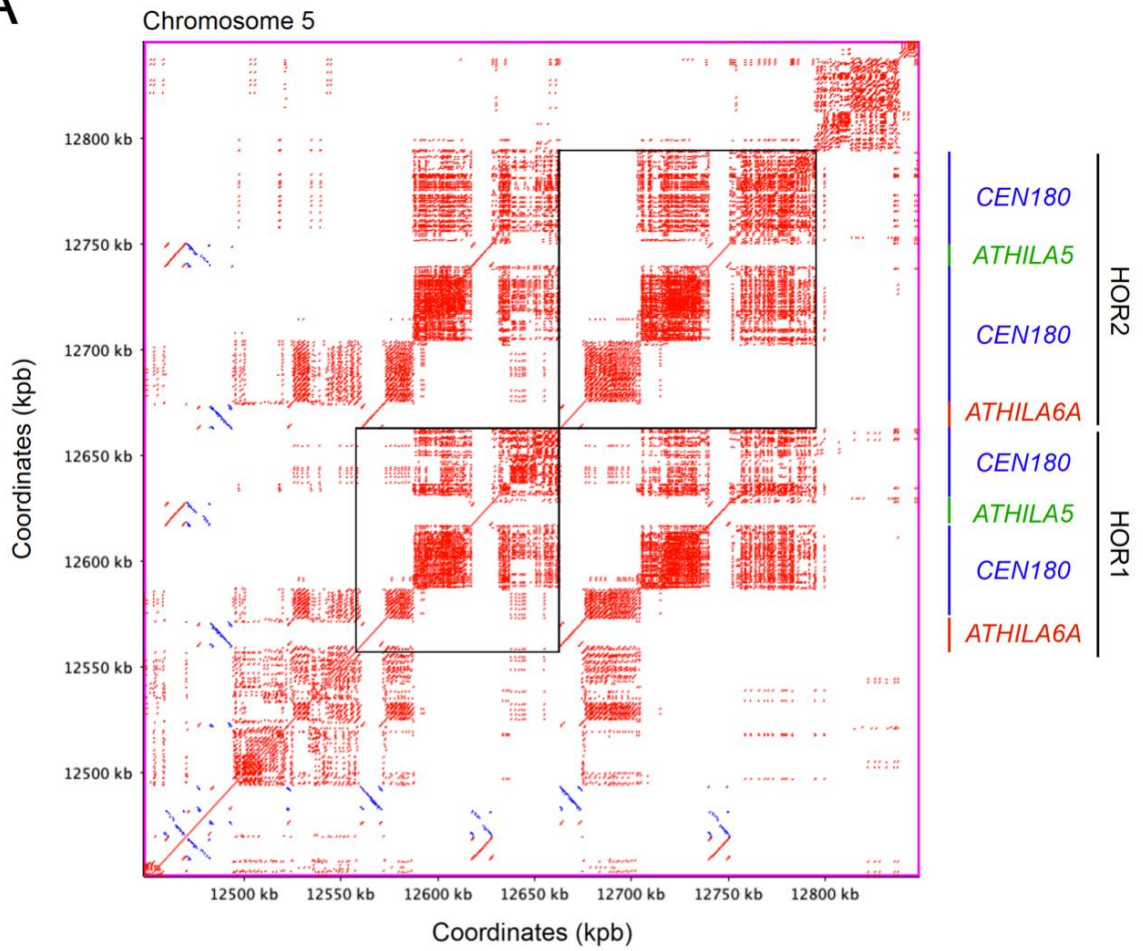**B**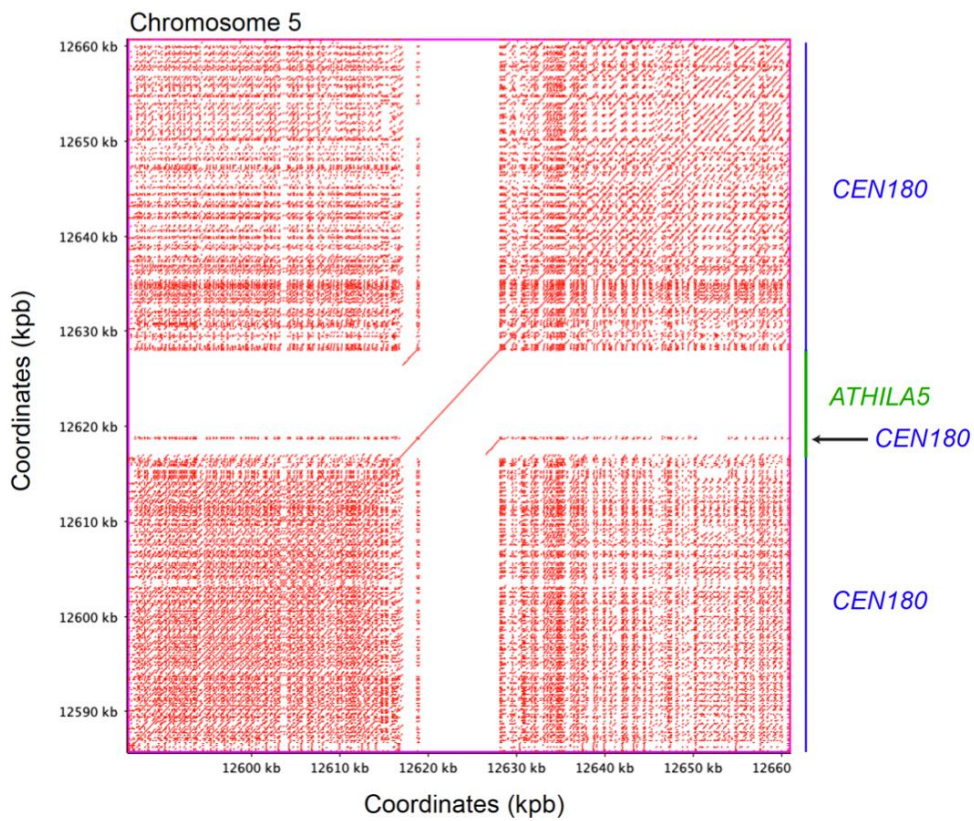

**Figure S11. Higher order duplication of *ATHILA* elements post-integration. A.** Dotplot analysis of a large region that has duplicated within the centromere of chromosome 5, forming higher order repeats (HOR1 and HOR2). The boundaries of each HOR are indicated by the black boxes within the dotplot. Each higher order repeat contains one *ATHILA5* and one *ATHILA6A* element that show high identity (99.5 and 99.6%) between copies. In contrast, the surrounding blocks of *CEN180* repeats within each HOR are more variable in size and show lower sequence identity (94.3-97.3%). Additional evidence that this region was duplicated after the insertion of the *ATHILA5* and *ATHILA6A* copies includes, i) their nearly identical lengths (11,345 vs. 11,346 bp for *ATHILA6A*, and 10,968 vs. 10,961 bp for *ATHILA5*), ii) the identical target site duplication (TSD) for the *ATHILA5* copies (GTAGT), iii) the identical flanking sequences (CCTAAGTAGT for the upstream and GTAGTGTTTC for the downstream region of *ATHILA5*, and AGACACAAAG for the downstream region of *ATHILA6A*), and iv) the fact that both *ATHILA5* contain internal *CEN180* copies in identical positions within their 5'-LTRs (see B). **B.** Dotplot analysis of one of the duplicated *ATHILA5* elements from A, which contains one complete and one partial copy of *CEN180*, located internally and downstream of the 5'-LTR. We postulate that the *CEN180* repeats inserted within the original *ATHILA5* copy prior to this region being duplicated.

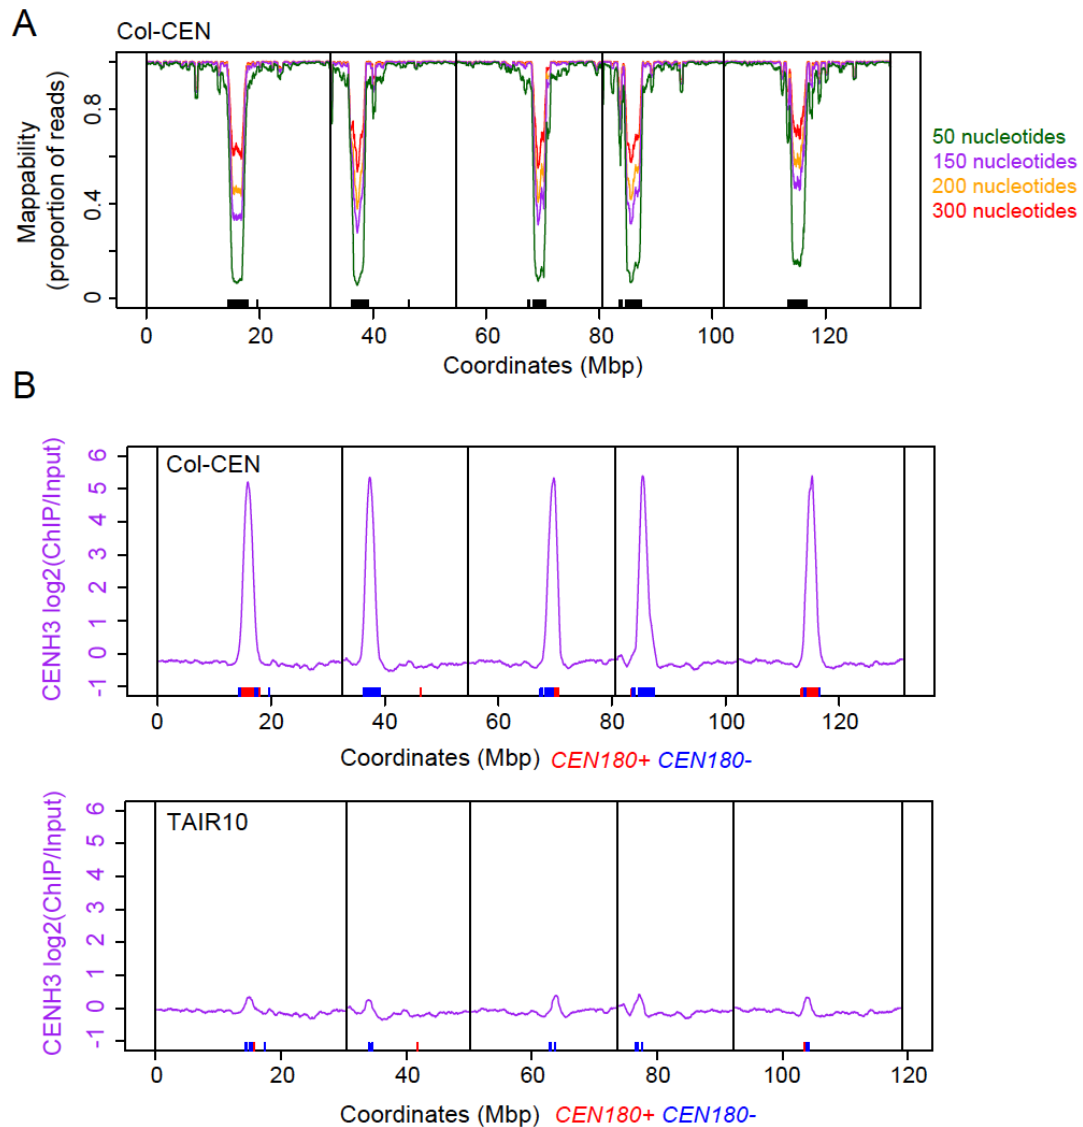

**Figure S12. Mappability within the centromeres and CENH3 ChIP-enrichment compared between the Col-CEN and TAIR10 assemblies. A.** Genome mappability was computed based on the uniqueness of  $k$ -mers for each genomic position, with up to  $e$  mismatches permitted (zero mismatches were permitted) using GenMap v1.3.0 (93, 94). The uniqueness of  $k$ -mers, or  $(k,e)$ -mappability, was calculated for each position using 50-, 150-, 200- and 300-mers.  $(k,e)$ -mappability for a given position represents the reciprocal value of the frequency with which the  $k$ -mer occurs in the genome. Chromosome-scale profiles were generated by calculating mean  $(k,e)$ -mappability values within adjacent 10-kb genomic windows. **B.** CENH3 log<sub>2</sub>(ChIP/Input) (purple) plotted along the Col-CEN (upper) or TAIR10 (lower) chromosomes. *CEN180* are indicated as ticks on the x-axis for forward (red) and reverse (blue) strand.



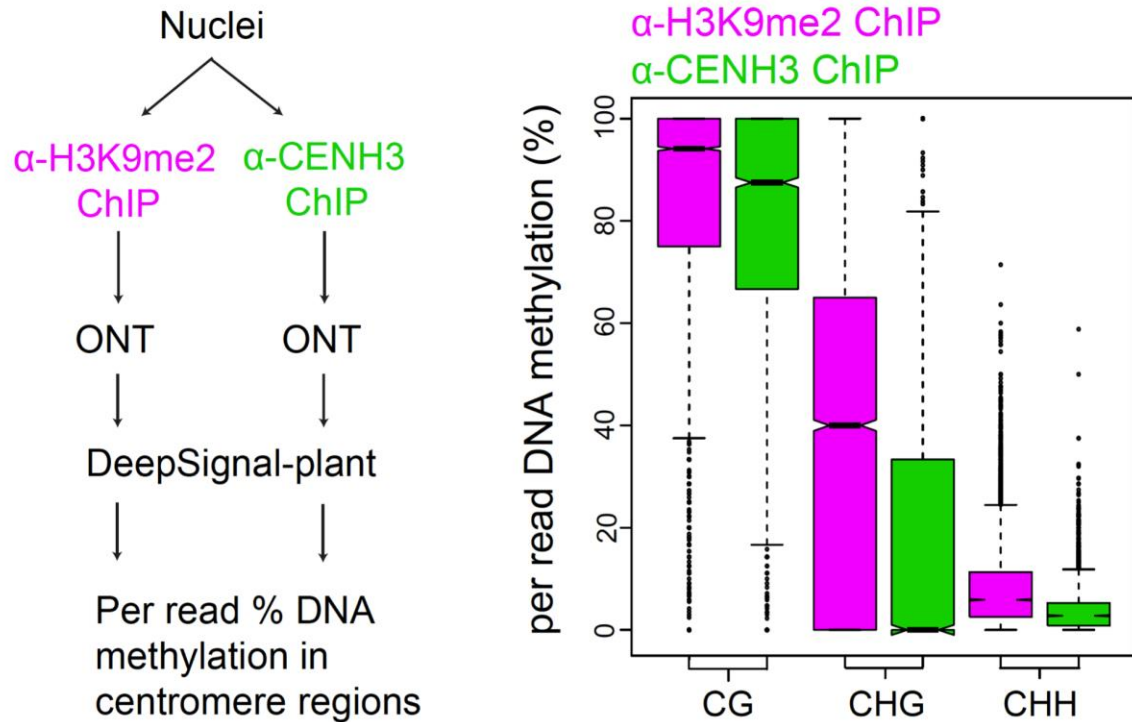

**Figure S13. Profiling DNA methylation of H3K9me2 and CENH3 ChIP DNA using ONT.** We performed ChIP-seq on Col-0 nuclei using H3K9me2 or CENH3 antibodies. The resulting DNA was then sequenced using a ONT Flongle flow cell. Reads were mapped to the Col-CEN assembly and filtered for those aligning within the centromeres. Read IDs were extracted, duplicates removed, and then used to extract fast5 files. The fast5 files were then analysed using DeepSignal-plant in order to calculate the mean methylation value for each context across each read. The boxplot shows mean DNA methylation levels across single reads for the CG, CHG and CHH sequence contexts. We observe that methylation is significantly lower in the CENH3 ChIP reads compared to H3K9me2, and that the difference is strongest for the CHG and CHH sequence contexts. CG context methylation is high in both H3K9me2 or CENH3 ChIP-seq read sets.

**A**

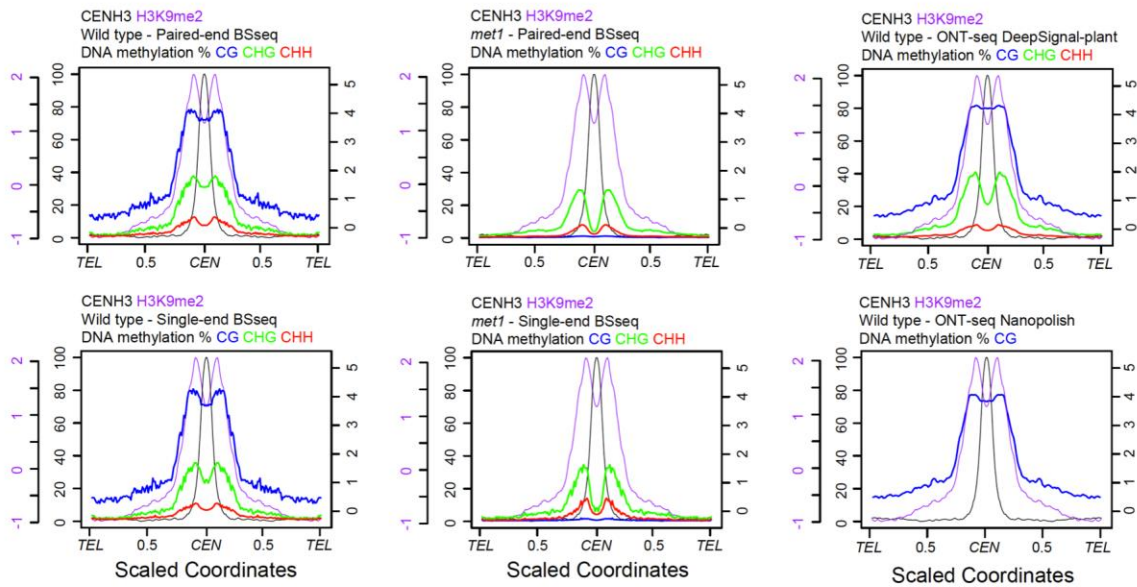

**B**

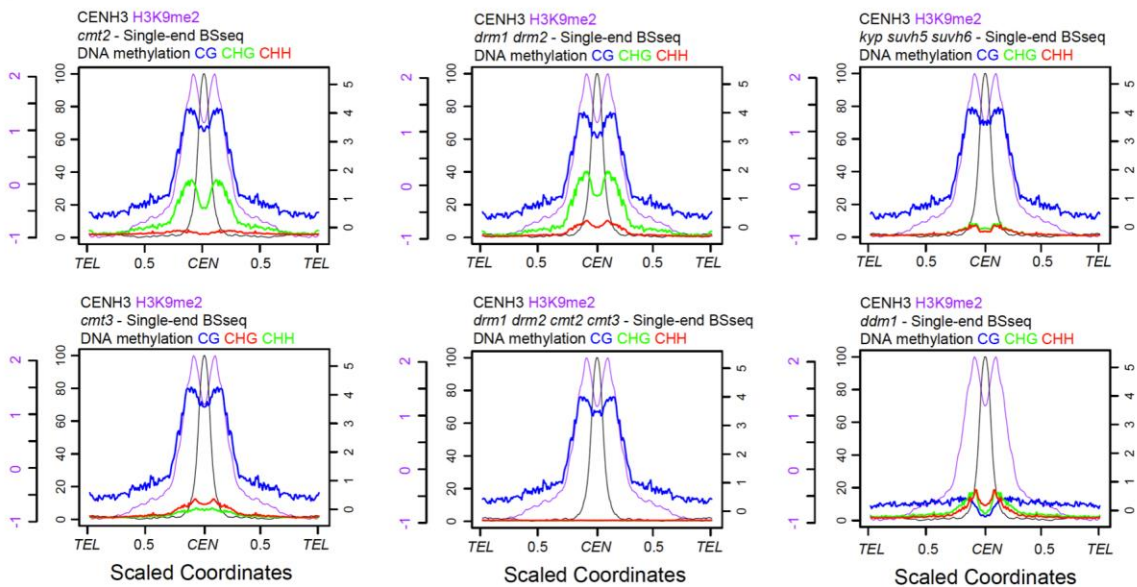

**Figure S14. Centromeric DNA methylation in wild type and CG and non-CG context pathway**

**mutants. A.** Plots of CENH3 (black) and H3K9me2 (purple) ChIP-seq enrichment along chromosomes scaled proportionally along the telomere-centromere axes (10, 26). DNA methylation profiles calculated from BS-seq data are plotted for CG (blue), CHG (red) and CHH (green) sequence contexts in the indicated genotypes (22, 29). Comparison of Col-0 and *met1* is shown using independent data sets that were sequenced with either paired-end or single-end reads (22, 29). As a comparison, DNA methylation profiles generated from ONT reads using the DeepSignal-plant and Nanopolish algorithms

are shown to the right. **B.** As for A., but comparing data from *cmt2*, *cmt3*, *drm1 drm2*, *drm1 drm2 cmt2*  
*cmt3*, *kyp suvh5 suvh6* and *ddm1* (21, 22).

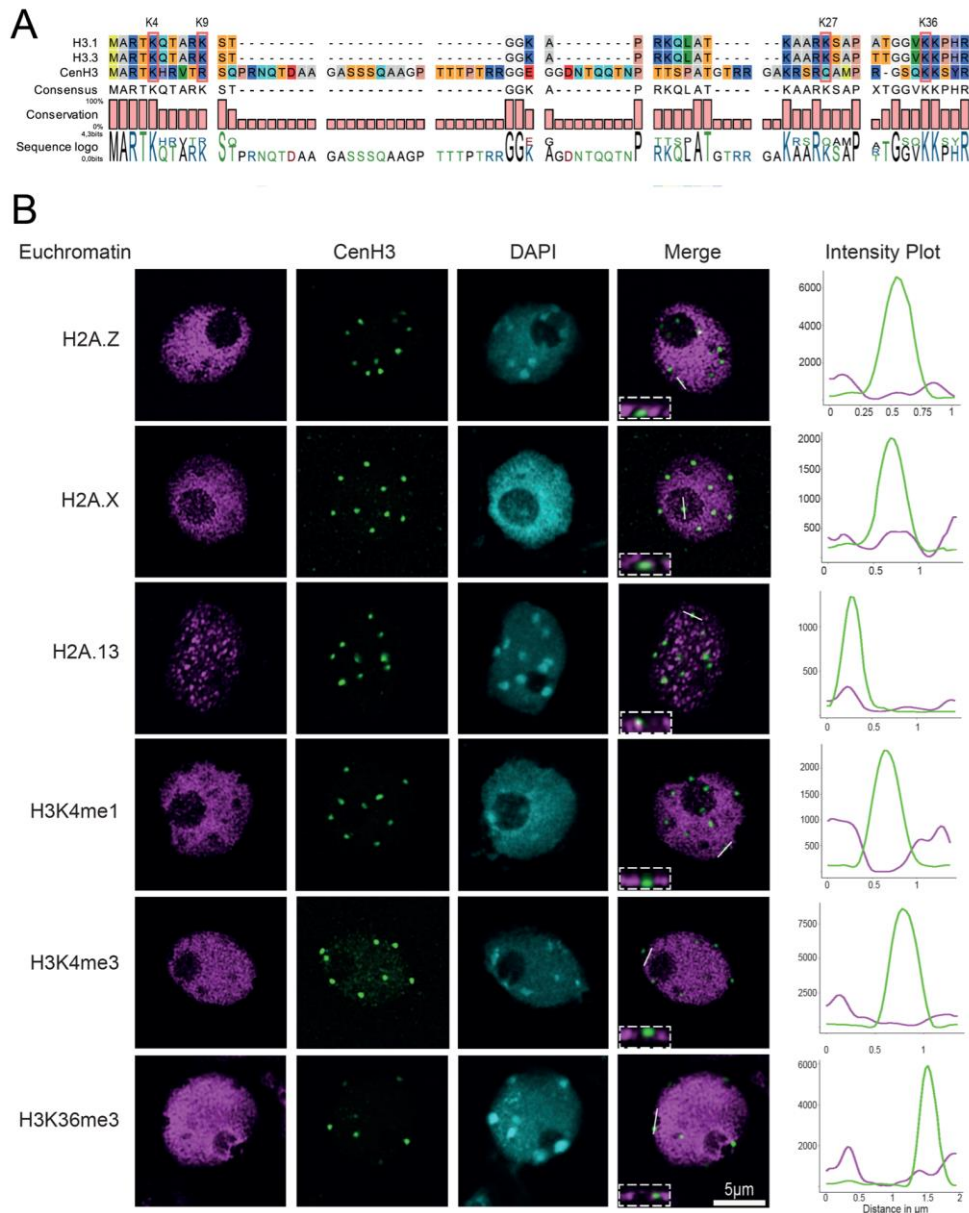

**Figure S15. Immunofluorescence analysis of euchromatic marks in isolated nuclei relative to CENH3.** **A.** Protein sequences of Arabidopsis H3.1, H3.3 and CENH3 were aligned using CLC Main Workbench. H3 N-terminal lysine residues known to be modified and investigated here are highlighted in red. **B.** Arabidopsis nuclei were stained for euchromatic marks (Magenta) and CENH3-GFP (green) and DNA (cyan=DAPI). The white line indicates the area of the confocal section. The confocal section is also depicted at the left bottom of each merged image. The intensity plot for the confocal section is shown on the right. Scale bars are 5 $\mu$ m.

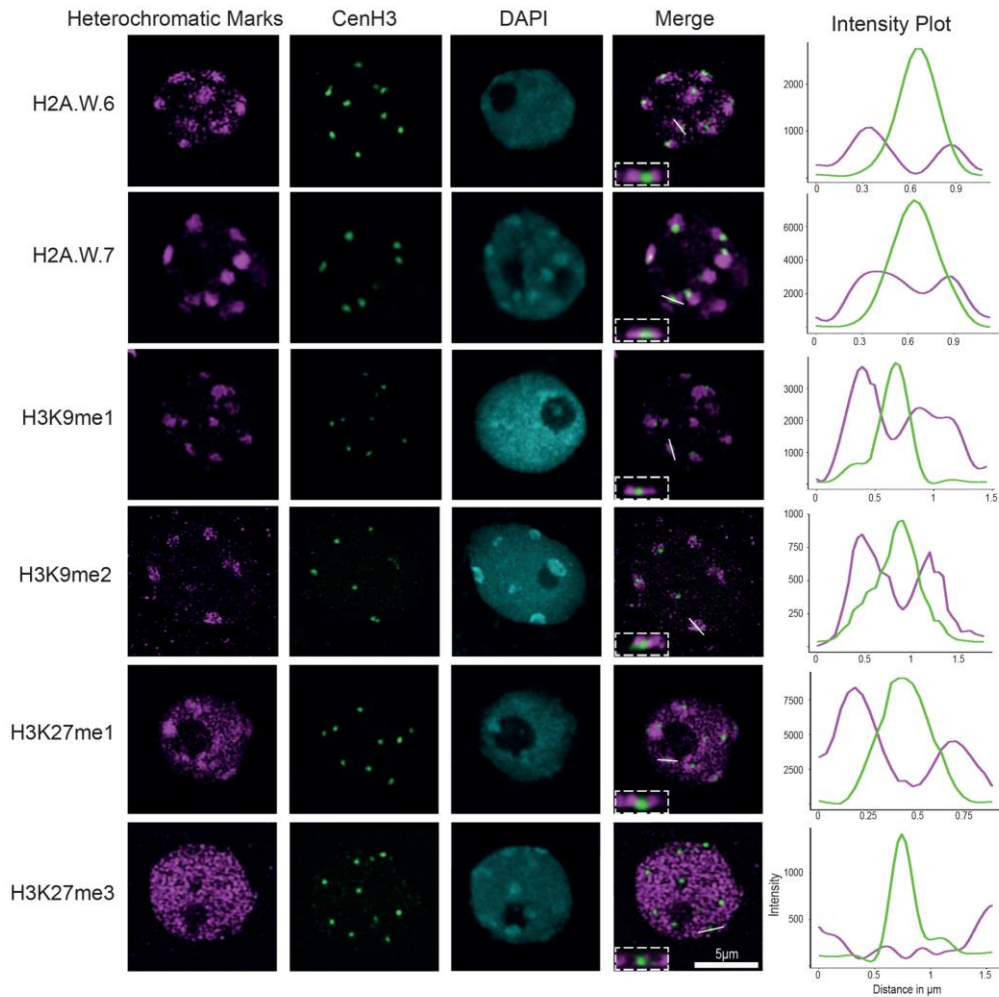

**Figure S16. Immunofluorescence analysis of heterochromatic marks in isolated nuclei relative to CENH3.** Arabidopsis nuclei were stained for heterochromatic marks (Magenta) and CENH3-GFP (green) and DNA (cyan=DAPI). The white line indicates the area of the confocal section. The confocal section is also depicted at the left bottom of each merged image. The intensity plot for the confocal section is shown on the right. Scale bars are 5 µm.

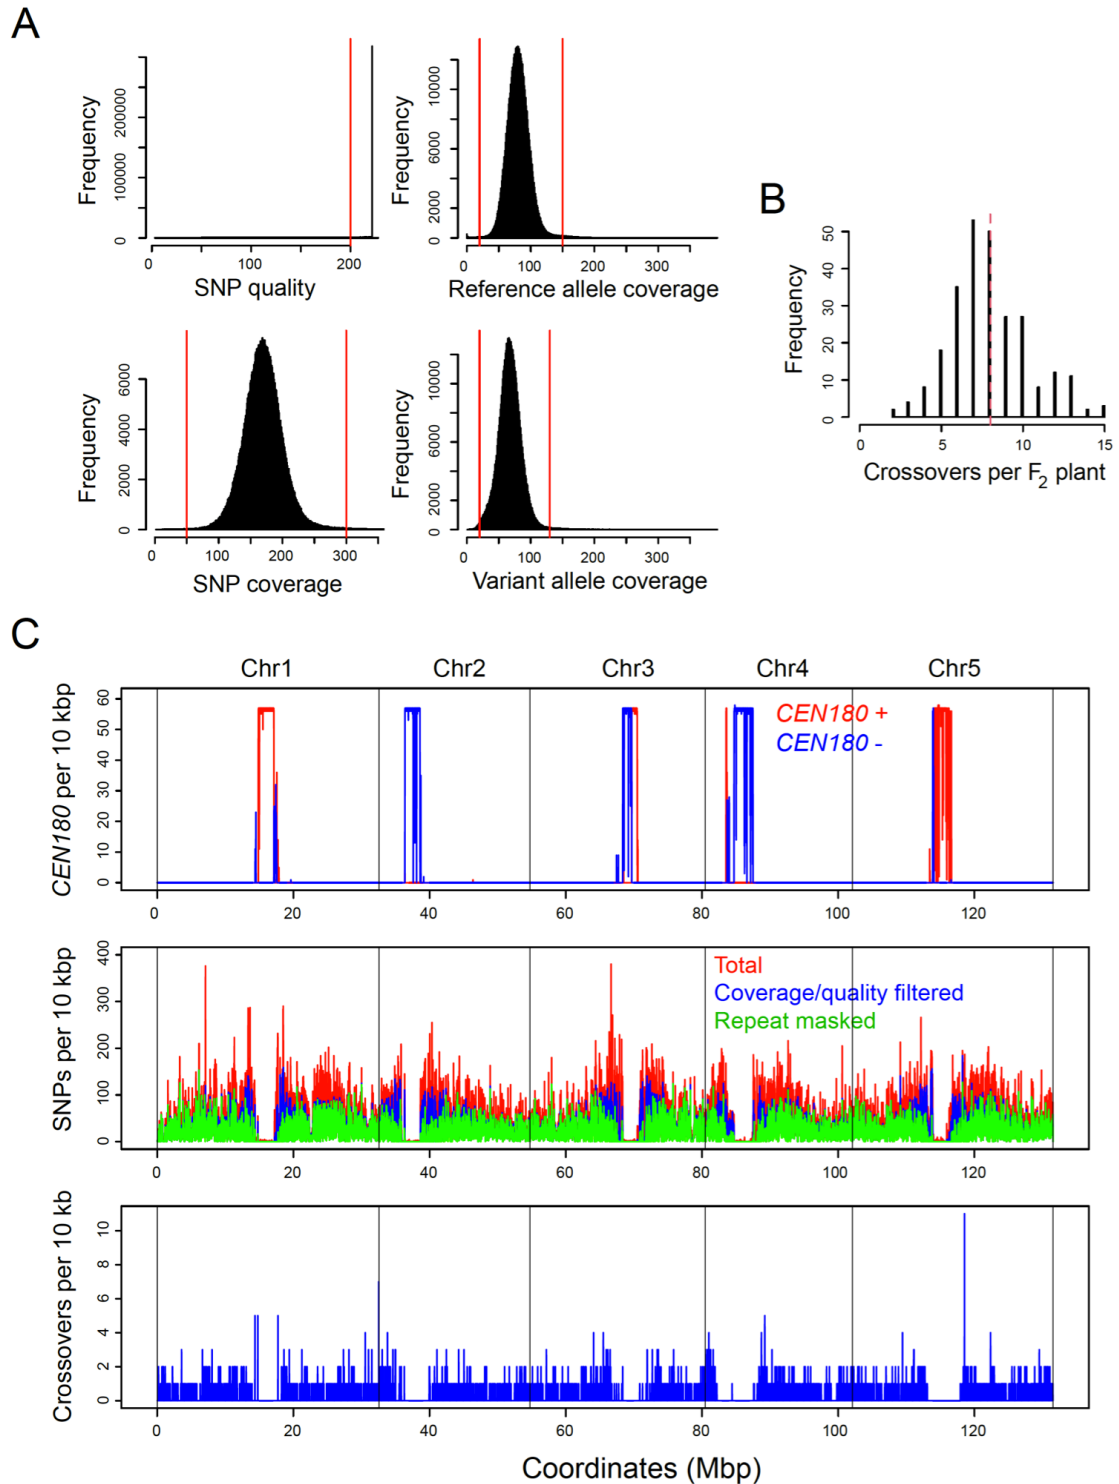

**Figure S17. Mapping Col×Ler single nucleotide polymorphisms (SNPs) and crossovers against the Col-0 centromere assembly. A.** Histograms showing the frequency of qualities, coverage, reference and variant allele coverages for single nucleotide polymorphisms (SNPs) called against the assembly using data from 260 Col×Ler genomic DNA  $F_2$  sequencing libraries. The red lines indicate thresholds where sites were filtered out of analysis. **B.** Histogram of crossovers mapped against the

assembly per Col×Ler F<sub>2</sub> plant. The red dotted line indicates the mean value. **C.** Plot of the assembly showing *CEN180* satellite density per 10 kbp for forward (red) and reverse (blue) strands (upper). Beneath, the frequency per 10 kbp of total Col×Ler SNPs (red) are plotted, in addition to SNP frequency filtered for quality and coverage values, as in A (blue), and SNPs following repeat-masking (green). The lower plot shows crossovers per 10 kbp (blue) mapped against the assembly.

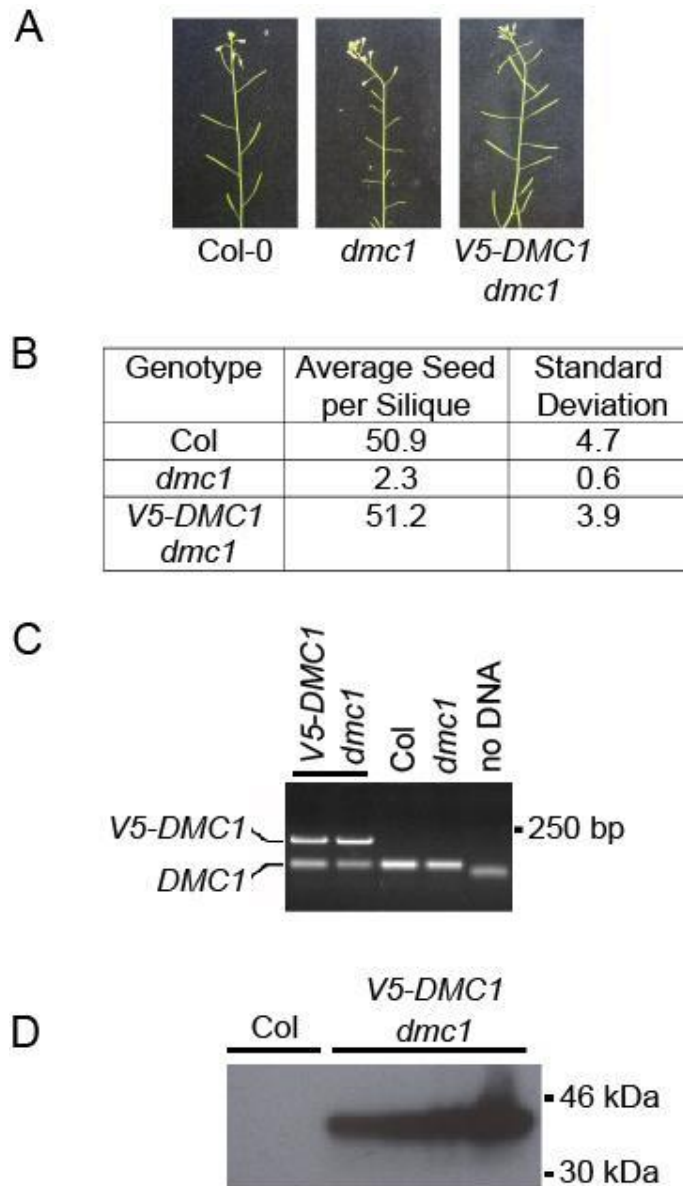

**Figure S18. Epitope-tagging and functional complementation of *V5-DMC1*.** **A.** Inflorescences of wild type (Col-0), *dmc1-3* and *V5-DMC1 dmc1-3*. Fertility is evident from silique length. **B.** Quantification of seed set per silique in wild type (Col-0), *dmc1-3* and *V5-DMC1 dmc1-3*. **C.** PCR based detection of the N-terminally epitope-tagged *V5-DMC1* transgene, alongside Col-0 and *dmc1-3* null controls. PCR primers flank the *DMC1* ATG translation start site. The expected PCR product sizes are 203 and 74 bp for epitope-tagged and wildtype *DMC1*, respectively. Unincorporated oligonucleotides are seen in ‘no DNA’ control. **D.**  $\alpha$ -V5 western blot from Col-0 and *V5-DMC1 dmc1-3* protein extracts from closed flower buds. The expected size of *V5-DMC1* is 41.7 kDa.



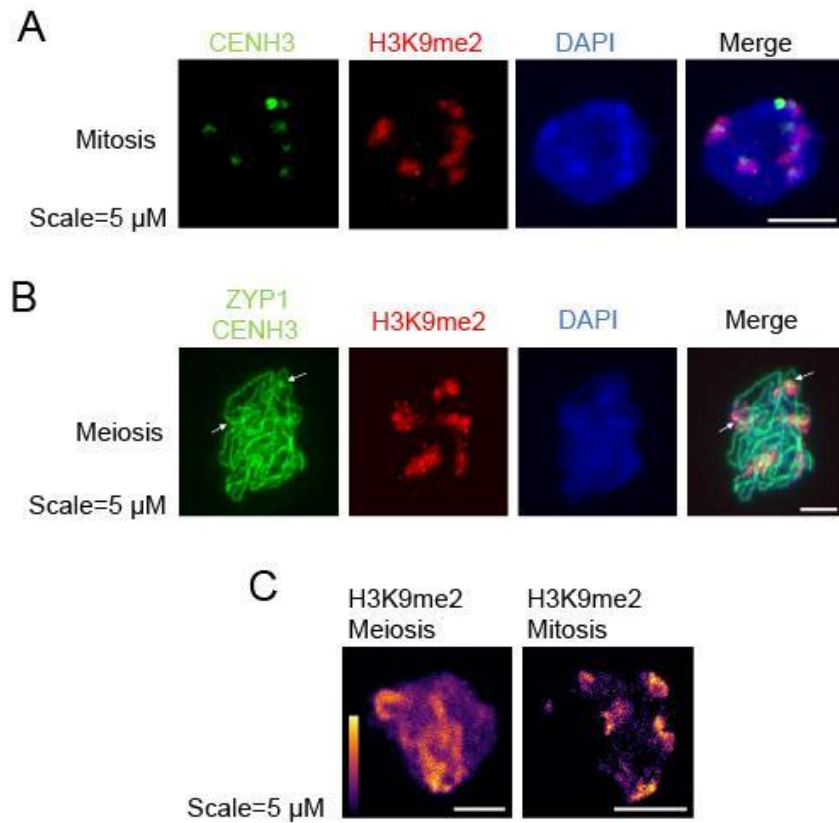

**Figure S19. Immunocytological staining of the Arabidopsis centromeres.** **A.** Somatic interphase nucleus immunostained for CENH3 (green), H3K9me2 (red) and stained for DAPI. Scale bar = 5  $\mu$ M. **B.** As for A, but showing an Arabidopsis male meiocyte in pachytene immunostained for CENH3 (green), ZYP1 (green) and H3K9me2 (red), and stained for DAPI (blue). Scale bar=5  $\mu$ M. **C.** Mitotic and meiotic cells immunostained for H3K9me2 and imaged using STED super resolution microscopy. The colour-scale indicates the intensity of staining, with yellow representing the maximum intensity. Scale bars = 5  $\mu$ M.

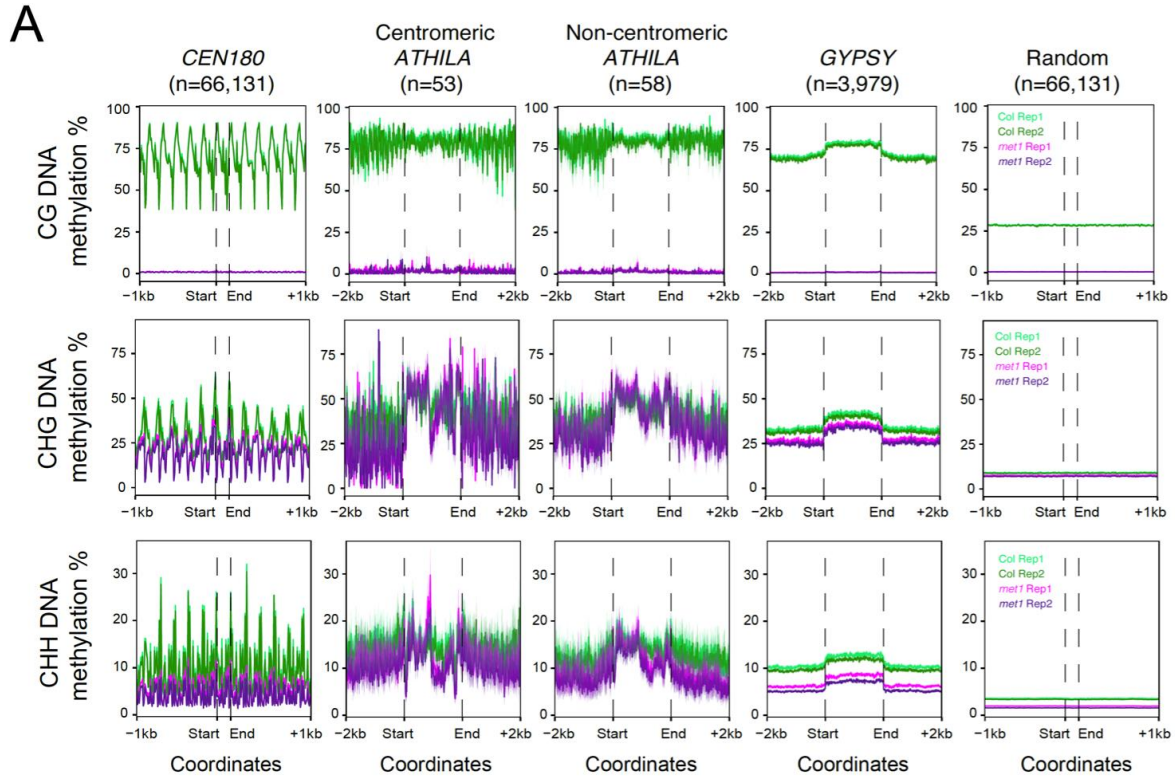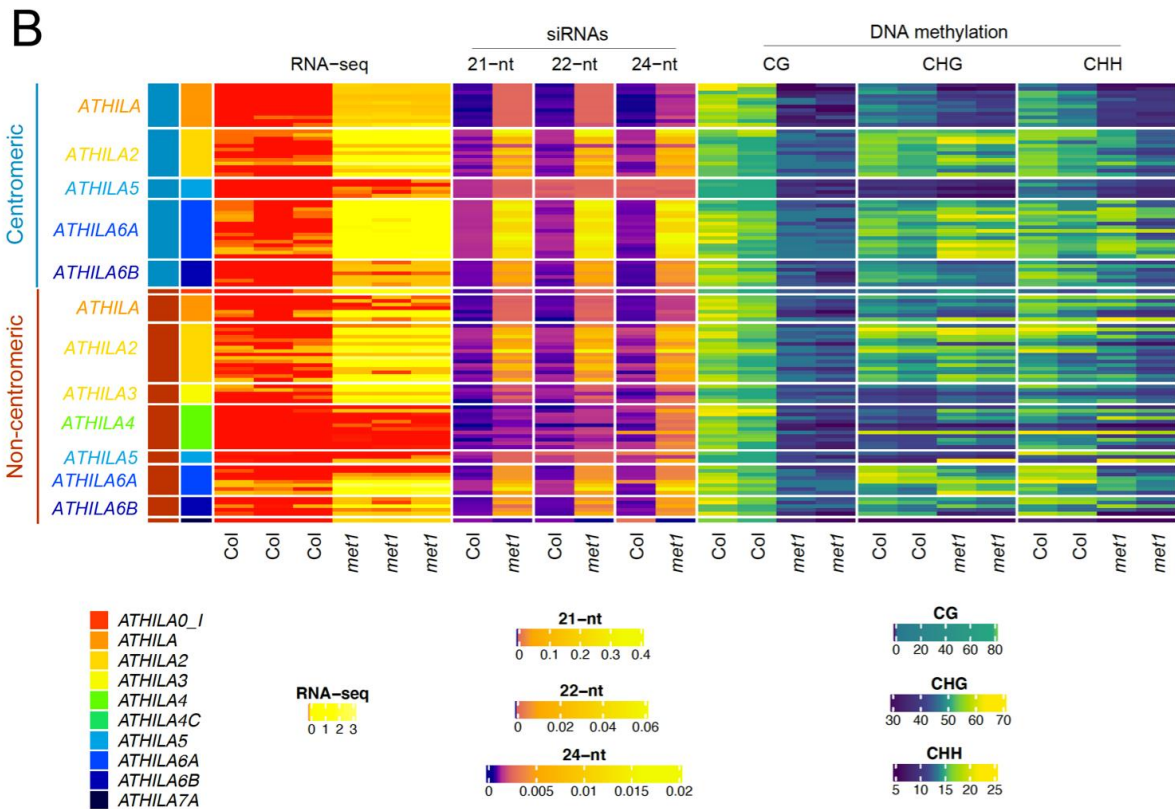

**Figure S20. DNA methylation, RNA and siRNA expression associated with *ATHILA* elements in wild type and *met1*.** A. CG, CHG and CHH context DNA methylation in wild type (Col-0, green) or *met1* (pink/purple) measured using BS-seq (29), over *CEN180* (n=66,131), centromeric *ATHILA*

(n=53), non-centromeric *ATHILA* (n=58), all *GYPHY* retrotransposons in the genome (n=3,979) and random positions (n=66,131). Shaded ribbons represent 95% confidence intervals for windowed mean values. **B.** Heatmap analysis of RNA-seq (29), siRNA-seq (29) and DNA methylation (29) data from wild type (Col-0) or *met1*. Each row represents an individual *ATHILA*, ordered according to their location within or outside the main centromeric *CEN180* arrays, and then by subfamily.

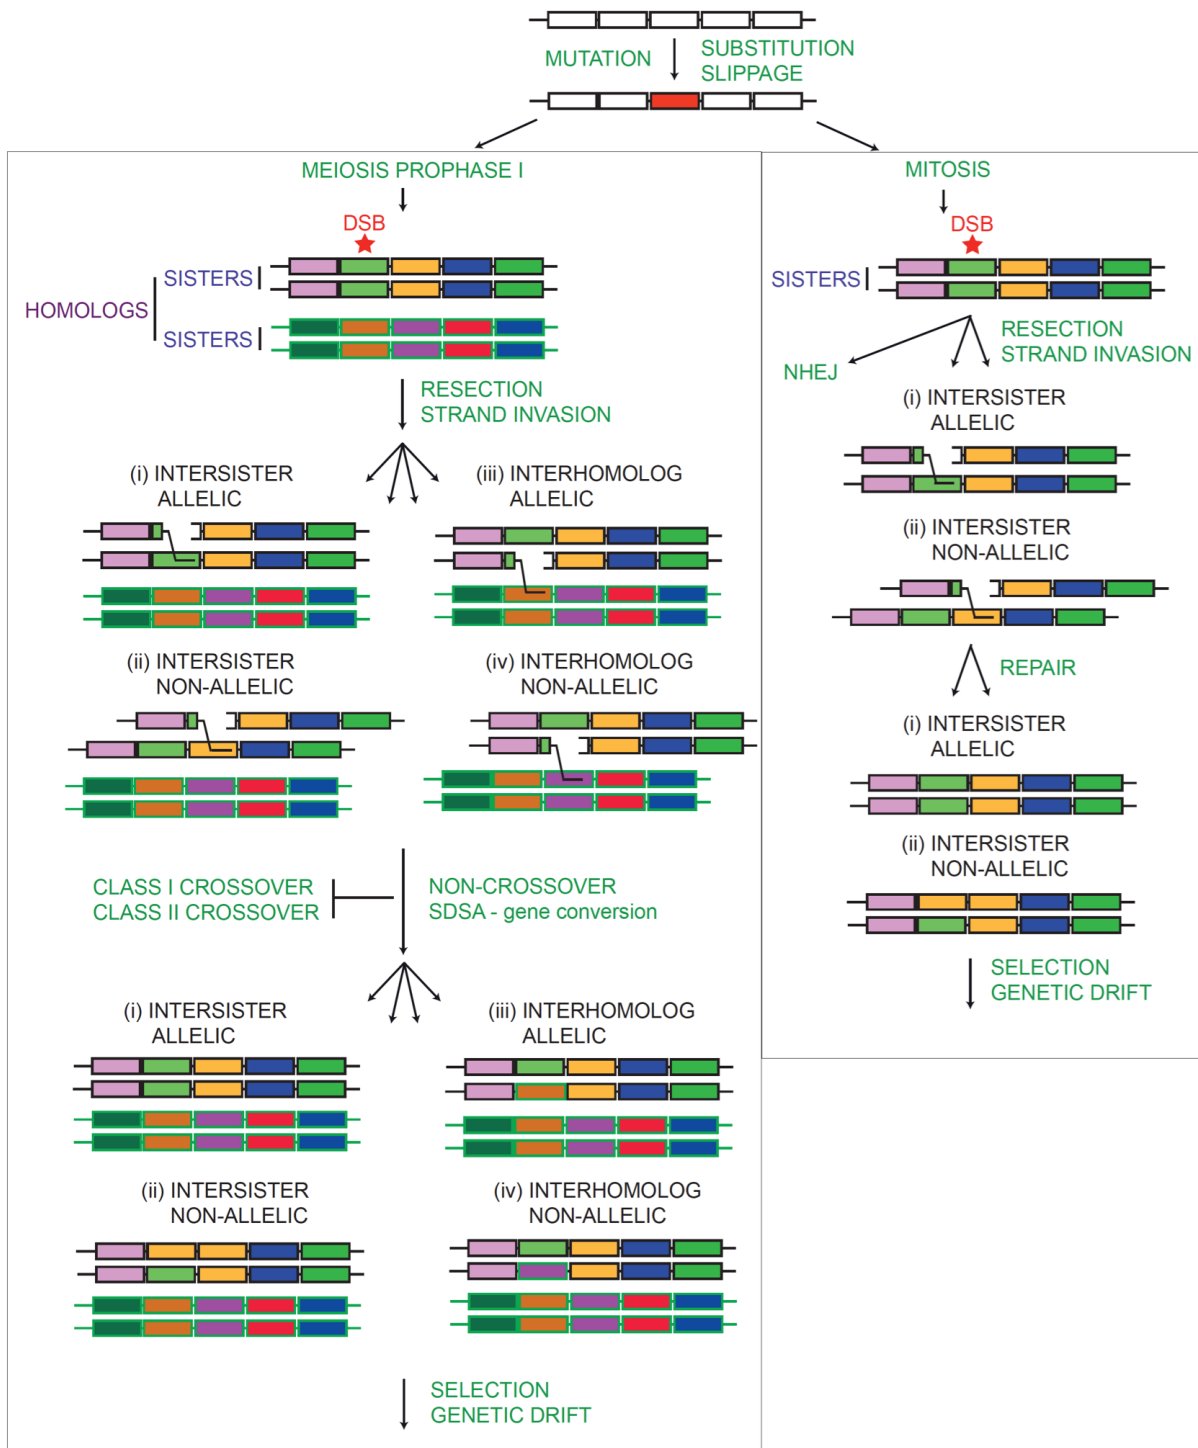

**Figure S21. Model for *CEN180* sequence evolution in Arabidopsis.** At the top of the diagram a representative array of five *CEN180* monomers (rectangles) is shown. Mutations, including base substitutions and replication slippage, generate monomer sequence variants (red). On the left hand side of the diagram we consider a similar representative region of five *CEN180* passing through meiosis, each of which has a distinct sequence, indicated by color. The 4 chromosomes are shown as two sisters

of each homolog. During meiotic prophase I, one chromosome experiences a DNA double strand break (DSB, red star). The DSB is processed via resection to form single stranded DNA that is bound by RAD51/DMC1, which promote invasion of another chromosome. We show four possible scenarios where the invading strand enters, (i) an allelic location on the sister chromatid, (ii) a non-allelic location on the sister chromatid, (iii) an allelic location on a homolog, or (iv) a non-allelic location on a homolog. Crossover repair, via either the Class I or Class II pathways, are suppressed within the centromere. Therefore, we propose that centromeric strand invasion events are instead repaired via meiotic non-crossover pathways, including synthesis-dependent strand annealing (SDSA), which can result in gene conversion. For simplicity conversion of single *CEN180* repeats is indicated, although based on patterns of higher order repetition we propose resection and conversion may involve multiple monomer repeats (up to 60). Recombinant *CEN180* arrays generated by these pathways are then subject to selection and genetic drift in populations. On the right hand side of the diagram, we indicate that DSB formation and repair within the *CEN180* arrays may also occur outside of meiosis. In this case, repair may proceed via non-homologous end joining (NHEJ), or using intersister homologous recombination in either allelic or non-allelic locations. These pathways may also generate variation in *CEN180* arrays that will be subject to selection and genetic drift.

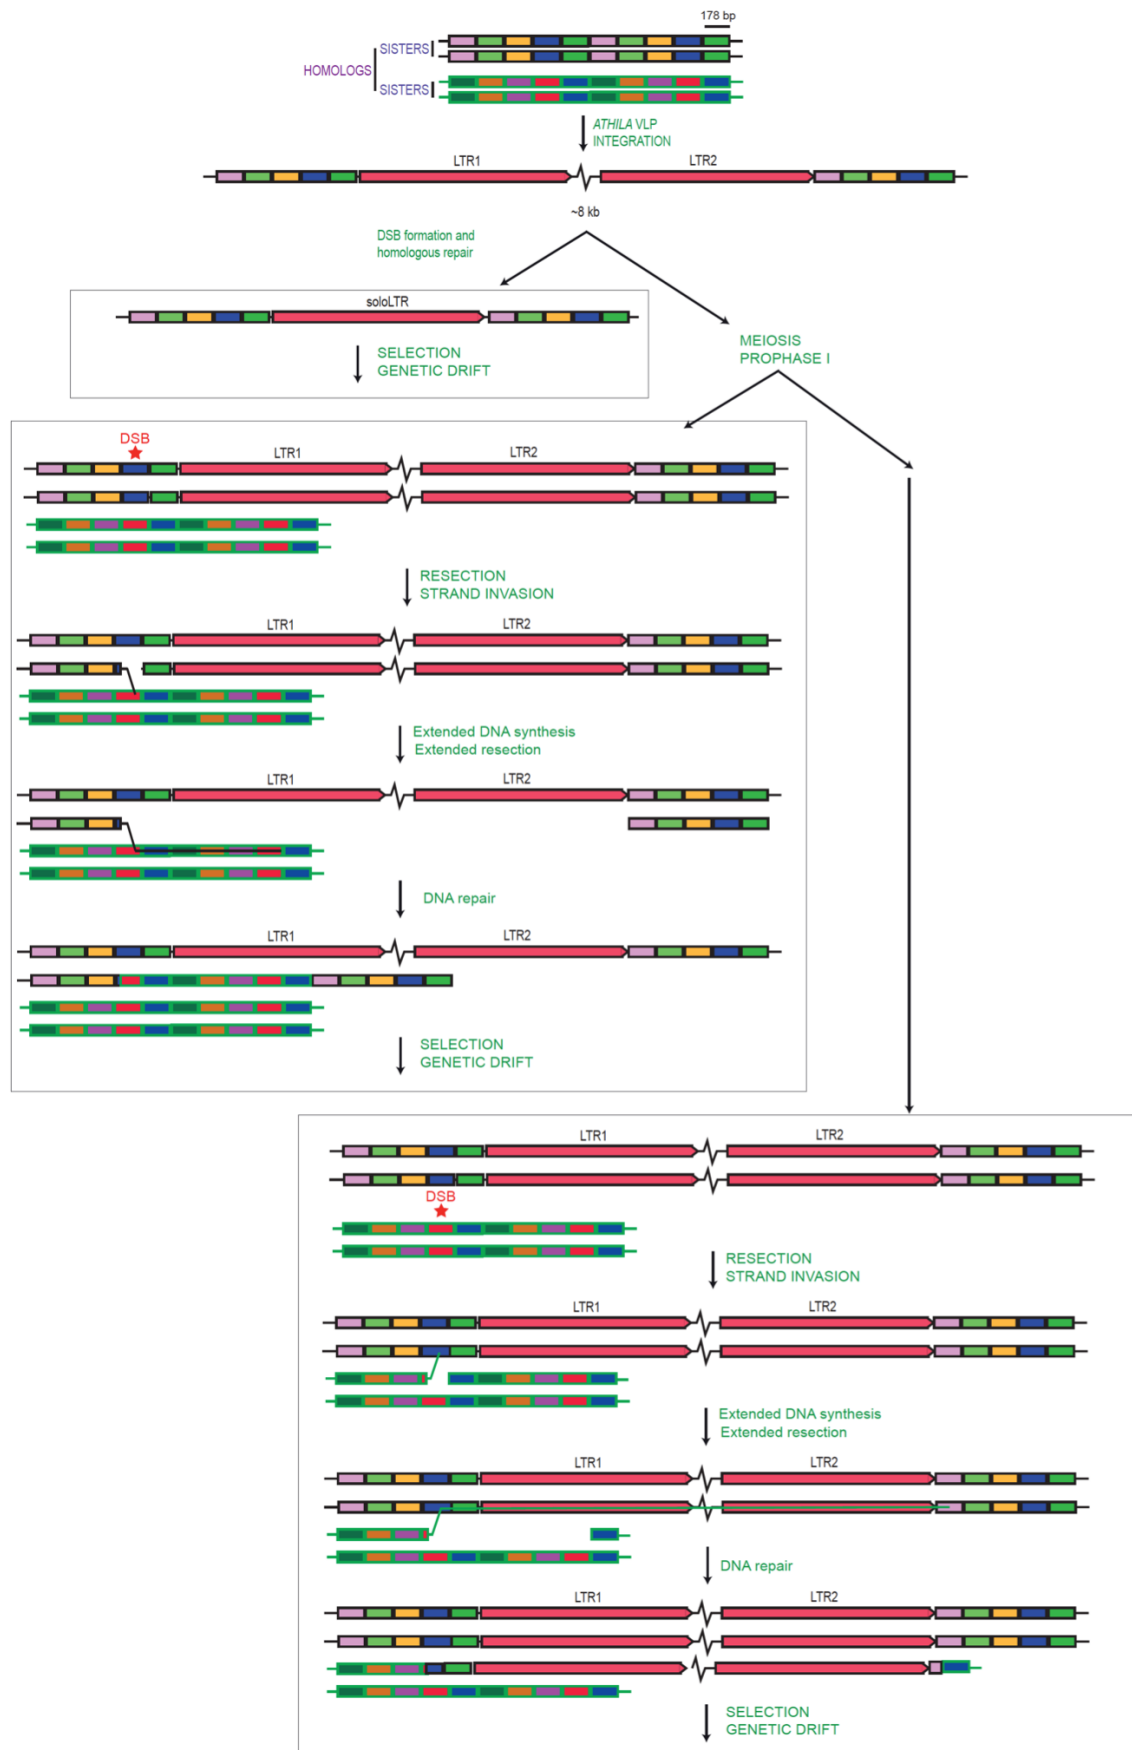

**Figure S22. Model for *ATHILA* integration and sequence evolution within the Arabidopsis centromeres.** We consider a representative region of ten *CEN180* monomers, with distinct monomers color-coded. The sister and homologous chromosomes are shown. A *de novo* *ATHILA* integration event is shown within one of the chromosomes. The paired long terminal repeats (LTRs, red) are shown approximately to scale, but the internal region of the transposon is not represented, but would typically consist of ~8 kbp of sequence. Following integration we consider three potential further changes to the *ATHILA* insertion. As we observe multiple centromeric *ATHILA* solo LTRs, we propose that DNA double strand break (DSB) formation and repair may occur within the *ATHILA* that results in formation of a solo LTR. This pathway may occur during mitosis or meiosis, and the resulting solo LTR would then be subject to selection and/or genetic drift. On the right hand side of the diagram we consider an alternative pathway during meiotic prophase I, showing two potential outcomes. In the left hand branch, a meiotic DSB (red star) forms in a *CEN180* linked to the *ATHILA* insertion (which is hemizygous). The DSB undergoes resection to form single stranded DNA (ssDNA) which is able to invade a homologous chromosome that lacks the *ATHILA* insertion. Based on the large size (10-100s kbp) of *CEN180* higher order repeats that we observe, we propose that an extended form of resection may occur that causes deletion of the *ATHILA* from the donor chromosome. The invading strand then undergoes template driven DNA synthesis that copies *CEN180* sequence from a different chromosome. Following dissolution of strand invasion and non-crossover repair with the parental chromosome, the *ATHILA* has effectively been eliminated. The resulting chromosomes are then subject to selection and genetic drift. An alternative outcome of this pathway is shown on the right hand side. In this case, a meiotic DSB forms on the homolog that lacks the *ATHILA*, followed by resection, ssDNA formation and strand invasion of the homolog that carries an *ATHILA* insertion. In this case, template driven DNA synthesis and non-crossover repair copies and duplicates the *ATHILA*. We propose that this recombination process represents a mechanism to eliminate the *ATHILA*, as although in some situations new copies of *ATHILA* are generated, due to the greater abundance of *CEN180* satellites in the centromeres there is a higher chance overall of this pathway eliminating the transposons.

**Table S1. Consensus quality (QV) score of the Col-CEN Arabidopsis genome assembly.** Consensus quality scores (QV) were calculated from “missing” 21-mers (k\_asm) present in the Col-CEN assembly, but not present in the short read Illumina library. k\_total shows the total number of 21-mers. QV scores were calculated for Col-CEN individual chromosomes (green), centromeres (blue), chromosome arms (orange), or the whole genome (yellow).

| feature_label             | chrom | start    | end      | k_asm | region_len | k_total   | error_rate             | QV    |
|---------------------------|-------|----------|----------|-------|------------|-----------|------------------------|-------|
| Chr1                      | Chr1  | 0        | 32540122 | 491   | 32540122   | 32540102  | 0.00000071<br>85324858 | 61.44 |
| Chr2                      | Chr2  | 0        | 22217084 | 12938 | 22217084   | 22217064  | 0.00002773<br>841542   | 45.57 |
| Chr3                      | Chr3  | 0        | 25743512 | 956   | 25743512   | 25743492  | 0.00000176<br>8393137  | 57.52 |
| Chr4                      | Chr4  | 0        | 21578073 | 4606  | 21578073   | 21578053  | 0.00001016<br>568227   | 49.93 |
| Chr5                      | Chr5  | 0        | 29480885 | 4525  | 29480885   | 29480865  | 0.00000730<br>9552866  | 51.36 |
| CEN1                      | Chr1  | 14841109 | 17559778 | 37    | 2718669    | 2718649   | 0.00000064<br>80851998 | 61.88 |
| CEN2                      | Chr2  | 3823791  | 6045243  | 26    | 2221452    | 2221432   | 0.00000055<br>73441539 | 62.54 |
| CEN3                      | Chr3  | 13597187 | 15733925 | 368   | 2136738    | 2136718   | 0.00000820<br>1946565  | 50.86 |
| CEN4                      | Chr4  | 4203901  | 6977949  | 4308  | 2774048    | 2774028   | 0.00007400<br>600007   | 41.31 |
| CEN5                      | Chr5  | 11784130 | 14551809 | 1934  | 2767679    | 2767659   | 0.00003328<br>6578     | 44.78 |
| Chr1-CEN1                 | NA    | NA       | NA       | 454   | 29821453   | 29821433  | 0.00000072<br>49552477 | 61.40 |
| Chr2-CEN2                 | NA    | NA       | NA       | 12912 | 19995632   | 19995612  | 0.00003075<br>906296   | 45.12 |
| Chr3-CEN3                 | NA    | NA       | NA       | 588   | 23606774   | 23606754  | 0.00000118<br>61153    | 59.26 |
| Chr4-CEN4                 | NA    | NA       | NA       | 298   | 18804025   | 18804005  | 0.00000075<br>46574935 | 61.22 |
| Chr5-CEN5                 | NA    | NA       | NA       | 2591  | 26713206   | 26713186  | 0.00000461<br>8941798  | 53.35 |
| Whole Genome              | NA    | NA       | NA       | 23516 | NA         | 131559576 | 0.00000851<br>2530102  | 50.70 |
| All CEN                   | NA    | NA       | NA       | 6673  | NA         | 12618486  | 0.00002518<br>859647   | 45.99 |
| Whole Genome -<br>All CEN | NA    | NA       | NA       | 16843 | NA         | 118941090 | 0.00000674<br>3688897  | 51.71 |



**Table S2. TAIR10 gene models that show presence-absence variation (PAV) in Col-CEN.** TAIR10 gene models were mapped onto Col-CEN using Liftoff (64). Genes that occurred as presence-absence variants (PAVs), as they did not map to Col-CEN, are listed and classified as loci in the CLUSTER\_ID column.

| ID        | CHROM | START (1-based) | END      | LEN  | PLUS_STRAND | NOTE                | CLUSTER_ID         |
|-----------|-------|-----------------|----------|------|-------------|---------------------|--------------------|
| AT1G34800 | Chr1  | 12773164        | 12773442 | 279  | 0           | protein_coding_gene | PCG_0<br>(THIONIN) |
| AT1G34805 | Chr1  | 12776578        | 12776856 | 279  | 0           | protein_coding_gene | PCG_0<br>(THIONIN) |
| AT1G34830 | Chr1  | 12793536        | 12794023 | 488  | 0           | protein_coding_gene | PCG_0<br>(THIONIN) |
| AT1G34840 | Chr1  | 12796984        | 12797247 | 264  | 0           | protein_coding_gene | PCG_0<br>(THIONIN) |
| AT1G38065 | Chr1  | 14289578        | 14292060 | 2483 | 0           | protein_coding_gene | PCG_1              |
| AT1G56820 | Chr1  | 21273314        | 21273395 | 82   | 1           | tRNA                | TRNA_6             |
| AT1G56910 | Chr1  | 21277861        | 21277942 | 82   | 1           | tRNA                | TRNA_6             |
| AT1G57030 | Chr1  | 21283986        | 21284067 | 82   | 1           | tRNA                | TRNA_6             |
| AT1G57210 | Chr1  | 21292992        | 21293073 | 82   | 1           | tRNA                | TRNA_6             |
| AT1G57240 | Chr1  | 21294341        | 21294422 | 82   | 1           | tRNA                | TRNA_6             |
| AT1G57300 | Chr1  | 21297221        | 21297302 | 82   | 1           | tRNA                | TRNA_6             |
| AT1G57330 | Chr1  | 21298753        | 21298834 | 82   | 1           | tRNA                | TRNA_6             |
| AT1G58808 | Chr1  | 21784645        | 21786869 | 2225 | 1           | other_RNA           | PCG_2              |
| AT1G58848 | Chr1  | 21791783        | 21797050 | 5268 | 1           | protein_coding_gene | PCG_2              |
| AT1G58983 | Chr1  | 21806020        | 21807487 | 1468 | 0           | protein_coding_gene | PCG_2              |
| AT1G59030 | Chr1  | 21808193        | 21809509 | 1317 | 0           | protein_coding_gene | PCG_2              |
| AT1G59077 | Chr1  | 21810644        | 21813023 | 2380 | 0           | protein_coding_gene | PCG_2              |
| AT1G59124 | Chr1  | 21816443        | 21820572 | 4130 | 1           | protein_coding_gene | PCG_2              |
| AT1G59312 | Chr1  | 21839858        | 21841972 | 2115 | 1           | protein_coding_gene | PCG_2              |
| AT5G36670 | Chr5  | 14401491        | 14406427 | 4937 | 1           | protein_coding_gene | PCG_3              |

|           |      |          |          |      |   |                     |       |
|-----------|------|----------|----------|------|---|---------------------|-------|
| AT5G36680 | Chr5 | 14406802 | 14409137 | 2336 | 0 | protein_coding_gene | PCG_3 |
| AT5G36690 | Chr5 | 14415185 | 14417288 | 2104 | 0 | protein_coding_gene | PCG_3 |
| AT5G36700 | Chr5 | 14421576 | 14424511 | 2936 | 0 | protein_coding_gene | PCG_3 |
| AT5G36720 | Chr5 | 14429661 | 14429924 | 264  | 0 | protein_coding_gene | PCG_3 |
| AT5G36722 | Chr5 | 14431599 | 14432216 | 618  | 0 | protein_coding_gene | PCG_3 |
| AT5G36800 | Chr5 | 14484565 | 14485409 | 845  | 0 | protein_coding_gene | PCG_3 |
| AT5G36820 | Chr5 | 14495617 | 14496849 | 1233 | 1 | protein_coding_gene | PCG_3 |

**Table S3. TAIR10 gene models that mapped as additional copies to Col-CEN.** TAIR10 gene models are listed that mapped via LiftOff to more than one location in Col-CEN (64). The CLUSTER\_ID column indicates close linkage of the duplicated genes.

| TAIR10 ID | TAIR10 CHR | TAIR10 START | TAIR10 LEN | TAIR10 NOTE    | COLCEN ID   | ColCEN CHR | ColCEN START | Col-CEN LEN | CLUSTER_ID |
|-----------|------------|--------------|------------|----------------|-------------|------------|--------------|-------------|------------|
| AT2G16145 | Chr2       | 7008520      | 80         | miRNA          | AT2G16145   | Chr2       | 9512451      | 80          | miRNA_1    |
| AT2G16145 | Chr2       | 7008520      | 80         | miRNA          | AT2G16145_1 | Chr2       | 9517494      | 80          | miRNA_1    |
| AT1G24822 | Chr1       | 8774997      | 2886       | protein_coding | AT1G24822   | Chr1       | 8780249      | 2886        | PCG_5      |
| AT1G24822 | Chr1       | 8774997      | 2886       | protein_coding | AT1G24822_1 | Chr1       | 8848453      | 2884        | PCG_5      |
| AT1G24909 | Chr1       | 8785785      | 2130       | protein_coding | AT1G24909   | Chr1       | 8830487      | 2130        | PCG_5      |
| AT1G24909 | Chr1       | 8785785      | 2130       | protein_coding | AT1G24909_1 | Chr1       | 8844863      | 2130        | PCG_5      |
| AT1G25141 | Chr1       | 8817678      | 705        | protein_coding | AT1G25141_2 | Chr1       | 8802028      | 705         | PCG_5      |
| AT1G25141 | Chr1       | 8817678      | 705        | protein_coding | AT1G25141_1 | Chr1       | 8839849      | 705         | PCG_5      |
| AT1G25141 | Chr1       | 8817678      | 705        | protein_coding | AT1G25141   | Chr1       | 8854226      | 705         | PCG_5      |
| AT1G25210 | Chr1       | 8833018      | 2095       | protein_coding | AT1G25210_1 | Chr1       | 8772607      | 2094        | PCG_5      |
| AT1G25210 | Chr1       | 8833018      | 2095       | protein_coding | AT1G25210   | Chr1       | 8840811      | 2093        | PCG_5      |
| AT1G59930 | Chr1       | 2206108<br>3 | 399        | protein_coding | AT1G59930   | Chr1       | 24161766     | 399         | PCG_6      |
| AT1G59930 | Chr1       | 2206108<br>3 | 399        | protein_coding | AT1G59930_1 | Chr1       | 24163425     | 399         | PCG_6      |
| AT1G77932 | Chr1       | 2930272<br>5 | 795        | protein_coding | AT1G77932   | Chr1       | 31405241     | 795         | PCG_7      |
| AT1G77932 | Chr1       | 2930272<br>5 | 795        | protein_coding | AT1G77932_1 | Chr1       | 31411502     | 795         | PCG_7      |
| AT1G77940 | Chr1       | 2930389<br>7 | 1486       | protein_coding | AT1G77940   | Chr1       | 31406413     | 1486        | PCG_7      |
| AT1G77940 | Chr1       | 2930389<br>7 | 1486       | protein_coding | AT1G77940_1 | Chr1       | 31412674     | 1486        | PCG_7      |
| AT5G39150 | Chr5       | 1566989<br>8 | 911        | protein_coding | AT5G39150   | Chr5       | 18143268     | 911         | PCG_8      |
| AT5G39150 | Chr5       | 1566989<br>8 | 911        | protein_coding | AT5G39150_1 | Chr5       | 18156831     | 911         | PCG_8      |
| AT5G39170 | Chr5       | 1568073<br>1 | 595        | protein_coding | AT5G39170_1 | Chr5       | 18154101     | 595         | PCG_8      |
| AT5G39170 | Chr5       | 1568073<br>1 | 595        | protein_coding | AT5G39170   | Chr5       | 18167662     | 595         | PCG_8      |

|           |      |              |      |                |             |      |          |      |        |
|-----------|------|--------------|------|----------------|-------------|------|----------|------|--------|
| AT5G39190 | Chr5 | 1569259<br>1 | 991  | protein_coding | AT5G39190_1 | Chr5 | 18152385 | 991  | PCG_8  |
| AT5G39190 | Chr5 | 1569259<br>1 | 991  | protein_coding | AT5G39190   | Chr5 | 18179541 | 991  | PCG_8  |
| AT5G40910 | Chr5 | 1639550<br>7 | 3623 | protein_coding | AT5G40910   | Chr5 | 18882480 | 3623 | PCG_9  |
| AT5G40910 | Chr5 | 1639550<br>7 | 3623 | protein_coding | AT5G40910_1 | Chr5 | 18887652 | 3623 | PCG_9  |
| ATCG00910 | ChrC | 100709       | 72   | tRNA           | ATCG00910_1 | Chr4 | 8541426  | 72   | tRNA_1 |
| ATCG00910 | ChrC | 100709       | 72   | tRNA           | ATCG00910   | ChrC | 100709   | 72   | tRNA_1 |

**Table S4. Unique and repeated *CEN180* monomer sequences within and between chromosomes.**

*CEN180* monomers were compared across the genome to identify unique versus repeated sequences.

For repeated sequences we show which chromosomes they occurred on.

| Chr  | Total  | Unique | Repeated | Chr1  | Chr2  | Chr3  | Chr4   | Chr5  | Chr2,<br>Chr4, Chr5 |
|------|--------|--------|----------|-------|-------|-------|--------|-------|---------------------|
| Chr1 | 13,578 | 4,174  | Chr1     | 9,372 | 0     | 265   | 0      | 2     | 25                  |
| Chr2 | 12,293 | 3,887  | Chr2     |       | 8,363 | 20    | 20     | 7     |                     |
| Chr3 | 11,848 | 3,944  | Chr3     |       |       | 7,662 | 0      | 7     |                     |
| Chr4 | 15,613 | 4,951  | Chr4     |       |       |       | 10,660 | 0     |                     |
| Chr5 | 12,799 | 5,484  | Chr5     |       |       |       |        | 7,287 |                     |
| All  | 66,131 | 22,440 | Total    | 9,372 | 8,363 | 7,947 | 10,680 | 7,303 | 43,691              |

**Table S5. *CEN180* higher order repeats.** *CEN180* monomers were classified as being the same if they shared 5 or fewer pairwise variants, and consecutive blocks identified as higher order repeats (HORs). HORs are all in a tandem orientation and are classified as being intra- or inter-chromosome. The mean HOR block size, in monomers and bp, and the mean distance between intra-chromosome HORs (bp) are listed.

| <b>Chr</b> | <b>Monomers</b> | <b>Intra-chromosome HORs</b> | <b>Inter-chromosome HORs</b> | <b>Mean HOR monomers</b> | <b>Mean HOR block (bp)</b> | <b>Mean HOR distance (bp)</b> |
|------------|-----------------|------------------------------|------------------------------|--------------------------|----------------------------|-------------------------------|
| 1          | 13,578          | 814,715                      | 24,110                       | 2.41                     | 429                        | 365,291                       |
| 2          | 12,293          | 584,684                      | 13,757                       | 2.35                     | 418                        | 434,776                       |
| 3          | 11,848          | 413,642                      | 2,743                        | 2.50                     | 446                        | 334,277                       |
| 4          | 15,613          | 498,876                      | 611                          | 2.40                     | 427                        | 402,170                       |
| 5          | 12,799          | 55,515                       | 0                            | 2.86                     | 509                        | 167,045                       |
| All        | 66,131          | 2,367,432                    | 41,221                       | 2.41                     | 429                        | 365,291                       |

**Table S6. Structural and sequence characteristics of centromeric *ATHILA* retrotransposons.**

Analysis of 111 gaps greater than 1 kbp in the main *CEN180* arrays identified 53 intact and 20 fragmented *ATHILA* retrotransposons, as well as 12 solo LTRs. For each sequence we report the *ATHILA* subfamily class based on the TAIR10 classification and our phylogenetic analysis, and information on element length, strand, target site duplications (TSDs), long terminal repeat (LTR) position and length, and hits with Hidden Markov Models (HMMs) that describe *GYPSY* LTR retrotransposon open reading frames (see Methods). The ‘quality’ column indicates whether the *ATHILA* is an ‘intact’ full-length element, i.e. it contains clearly identified LTRs and, possibly, a TSD; a fragment - note that we also included as fragments and not as intact elements, i) *ATHILA* copies with large internal deletions (e.g. the 4872 bp *ATHILA2* element in centromere 4 has complete and highly similar LTRs but also a ~6 kbp internal deletion), and ii) *ATHILA* copies with a deletion that included the whole LTR plus additional sequence in the internal domain; or a solo LTR. The ‘comment’ column includes notes on interesting characteristics for some elements. For example, it highlights the *ATHILA5* duplicates in centromere 5 that contain the internal *CEN180* repeats, and some cases where two intact *ATHILA* of the same subfamily share one LTR (LTR-internal.region-LTR-internal.region-LTR), possibly as a result of post-integration interelement homologous recombination. Given that the LTRs of the *ATHILA6A* and *ATHILA6B* subfamilies appear identical, it was not possible to further allocate solo LTRs of the *ATHILA6* clade into their respective subfamilies. In addition to the *ATHILA* elements, a small number of other TEs were identified but not further analyzed due to their fragmented organization. The majority of these elements occur in centromere 1 and are shown at the end of the Table. Note that for these elements the coordinates refer to the position of the gaps and not the TEs within the gaps. Due to size, Table S6 is attached as a separate file ‘Table\_S6.xlsx’.

**Table S7. Summary of short-read Illumina sequencing libraries aligned to the Col-CEN assembly.**

All data sets were generated from plants in a Col-0 background, with the exception of the Col×Ler F<sub>2</sub> genomic DNA sequencing libraries that were used to identify meiotic crossovers.

| Library              | Study accession | Run accession | Read length | Tissue     | References |
|----------------------|-----------------|---------------|-------------|------------|------------|
| CENH3<br>ChIP-seq    | PRJNA349052     | SRR4430537    | 2×100 bp    | Seedling   | (10)       |
| H3K9me2<br>ChIP-seq  | PRJEB36221      | ERR3813867    | 2×75 bp     | Floral bud | (26)       |
| H3K27me1<br>ChIP-seq | PRJEB36221      | ERR3813864    | 2×75 bp     | Floral bud | (26)       |
| H3K4me1<br>ChIP-seq  | PRJEB36221      | ERR3813865    | 2×75 bp     | Floral bud | (26)       |
| H3K4me2<br>ChIP-seq  | PRJEB36221      | ERR3813866    | 2×75 bp     | Floral bud | (26)       |
| H3K4me3<br>ChIP-seq  | PRJEB15183      | ERR1590146    | 2×150 bp    | Floral bud | (28)       |
| H3K27me3<br>ChIP-seq | PRJNA252965     | SRR1509478    | 2×100 bp    | Floral bud | (87)       |
| H2A.W6<br>ChIP-seq   | N/A             | N/A           | 50 bp       | Seedling   | This study |
| H2A.W7<br>ChIP-seq   | N/A             | N/A           | 50 bp       | Seedling   | This study |



|                                          |                             |                                                       |          |            |          |
|------------------------------------------|-----------------------------|-------------------------------------------------------|----------|------------|----------|
| H2A.Z ChIP-seq                           | PRJNA219442                 | SRR988546                                             | 50 bp    | Leaf       | (24)     |
| REC8 ChIP-seq                            | PRJEB36221                  | ERR3813871                                            | 2×75 bp  | Floral bud | (26)     |
| ASY1 ChIP-seq                            | PRJEB36320                  | ERR3829803                                            | 2×75 bp  | Floral bud | (27)     |
| SPO11-1-oligos                           | PRJEB15185                  | ERR1590157                                            | 50 bp    | Floral bud | (28)     |
| MNase-seq                                | PRJEB15184                  | ERR1590154                                            | 2×100 bp | Floral bud | (28)     |
| gDNA                                     | PRJEB23842                  | ERR2215865                                            | 2×100 bp | Floral bud | (28)     |
| RNA-seq (Col-0 and <i>met1-3</i> )       | PRJEB9919                   | ERR966157–<br>ERR966162                               | 2×100 bp | Leaf       | (29)     |
| Bisulfite-seq (Col-0 and <i>met1-3</i> ) | PRJEB9919                   | ERR965674–<br>ERR965677                               | 2×90 bp  | Leaf       | (29)     |
| Bisulfite-seq (Col-0 and mutants)        | PRJNA172021,<br>PRJNA222364 | SRR534177–<br>SRR869314,<br>SRR1005412–<br>SRR1005415 | 50 bp    | Leaf       | (21, 22) |
| Small RNA-seq (Col-0 and <i>met1-3</i> ) | PRJEB9919                   | ERR966148–<br>ERR966149                               | 50 bp    | Leaf       | (29)     |

|                                              |                            |                            |          |      |          |
|----------------------------------------------|----------------------------|----------------------------|----------|------|----------|
| Col-0×Ler-0<br>genomic DNA<br>F <sub>2</sub> | E-MTAB-4657<br>E-MTAB-6577 | E-MTAB-4657<br>E-MTAB-6577 | 2×150 bp | Leaf | (88, 89) |
| Hi-C (Col-0)                                 | PRJNA253621                | SRR1504819                 | 2×50 bp  | Leaf | (90)     |

**Table S8. Oligonucleotides.** The sequence of oligonucleotides used for *V5-DMC1* construction and genotyping, and FISH, are listed.

| Oligo name       | Sequence 5' to 3'                                                                                                         | Purpose                                               |
|------------------|---------------------------------------------------------------------------------------------------------------------------|-------------------------------------------------------|
| Dmc1-PstI-fw     | ATATATACTGCAGGATATCAAACATTTACC<br>TGAAAAGA                                                                                | Cloning <i>3V5-DMC1</i>                               |
| Dmc1-SphI-rev    | ATATATGCATGCTTCTTTTAACTCTTCTCAT                                                                                           | Cloning <i>3V5-DMC1</i>                               |
| Dmc1-SphI-fw     | AAAGAAGCATGCTTAAGCCAACAGAG                                                                                                | Cloning <i>3V5-DMC1</i>                               |
| Dmc1-NotI-rev    | ATATATATATATGCGGCCGCGAGTTTTGCA<br>GCAATTATGAAA                                                                            | Cloning <i>3V5-DMC1</i>                               |
| Dmc1-Spe-rev     | TATCAAAGTAGTGTAAGTAAACCTTGGTT                                                                                             | Cloning <i>3V5-DMC1</i> ,<br>genotyping <i>dmc1-3</i> |
| DMC1-Nco-F       | TTTCTTTCCATGGATTAAAAAAATTTG                                                                                               | Cloning <i>3V5-DMC1</i>                               |
| 3N-V5-F          | GGTAAACCAATCCCAAACCCACTCCTCGGT<br>CTCGACTCAACAGGAAAGCCTATTCCTAAT<br>CCTCTTCTTGGACTTGATTCTACTATGATG<br>GCTTCTCTTAAGTAAGTGA | Cloning <i>3V5-DMC1</i>                               |
| 3N-V5-R          | GGGTTTGGGATTGGTTTACCAGTAGAATCA<br>AGTCCAAGAAGAGGATTAGGAATAGGCTT<br>TCCCATTTTCTCGCTCTAAGAGTCTCTA                           | Cloning <i>3V5-DMC1</i>                               |
| Dmc1-screen-N-fw | CTCTCACTCTTCCAAGCTTA                                                                                                      | Genotyping <i>3V5-DMC1</i>                            |

|                    |                                                                       |                                                             |
|--------------------|-----------------------------------------------------------------------|-------------------------------------------------------------|
| Dmc1-screen-N-rev  | AGAGATCAATCACTTACTTAAGAG                                              | Genotyping <i>3V5-DMC1</i>                                  |
| LA27               | TAGCATCTGAATTTTCATAACCAATCTCGAT<br>ACAC                               | Genotyping <i>dmc1-3</i>                                    |
| DMC1-genot-compl-F | CATACATTGACACAGAGGGAACC                                               | Genotyping <i>dmc1-3</i> in the presence of <i>3V5-DMC1</i> |
| DMC1-genot-compl-R | ATGGAACCCAAAAGAGGAGAC                                                 | Genotyping <i>dmc1-3</i> in the presence of <i>3V5-DMC1</i> |
| ATH_cecen180F      | CATATTCGACTCCAAAACACTAACC                                             | Amplification of pAL universal <i>CEN180</i> probe          |
| ATH_cen180R        | AGAAGATACAAAGCCAAAGACTCAT                                             | Amplification of pAL universal <i>CEN180</i> probe          |
| <i>CEN180-α</i>    | CCGCAACAGGATCTTAAAGGCGTAAGAAT<br>TTTATTCTGTAAAAGACACAAAGCCAAA<br>GA   | <i>CEN180</i> FISH probe                                    |
| <i>CEN180-β</i>    | ATTGAATCTTTGTTAGAAGATACAAAGAC<br>AAAGACTCATAACGGACTTCGACTACACTAT<br>C | <i>CEN180</i> FISH probe                                    |
| <i>CEN180-γ</i>    | TTAAACTGCAATTGGATCTTAAAGGCGTAA<br>GAATTGTATCCTTGTAAAAGACACAAAG<br>C   | <i>CEN180</i> FISH probe                                    |

|                                    |                                                                      |                                                       |
|------------------------------------|----------------------------------------------------------------------|-------------------------------------------------------|
| <i>CEN180-δ</i>                    | CGCATCTTATAAGCCTAAGTAGTATTTCTT<br>TGTTAGAATACACAAAGTCAAAGACTCAT<br>A | <i>CEN180</i> FISH probe                              |
| <i>CEN180-ε</i>                    | TCTTATAAGCCTAAGTAGTGTTTCCTTGTT<br>AGAAGACACAAAGCCAATGACTCATATCG<br>C | <i>CEN180</i> FISH probe                              |
| <i>ATHILA2_GAG_F</i>               | GGATCCACTCGACCACCTTG                                                 | Amplification of the <i>ATHILA2</i><br>FISH probe     |
| <i>ATHILA2_GAG_R</i>               | AACCCTTGAAACGCTCCCAT                                                 | Amplification of the <i>ATHILA2</i><br>FISH probe     |
| <i>ATHILA6A6B_GAG_</i><br><i>F</i> | GATCCACTCGATCACCTGGAC                                                | Amplification of the<br><i>ATHILA6A/6B</i> FISH probe |
| <i>ATHILA6A6B_GAG_</i><br><i>R</i> | TCCCATGCTTCGCAGAAAGT                                                 | Amplification of the<br><i>ATHILA6A/6B</i> FISH probe |

## References and Notes

1. H. S. Malik, S. Henikoff, Major evolutionary transitions in centromere complexity. *Cell* **138**, 1067–1082 (2009). [doi:10.1016/j.cell.2009.08.036](https://doi.org/10.1016/j.cell.2009.08.036) [Medline](#)
2. D. P. Melters, K. R. Bradnam, H. A. Young, N. Telis, M. R. May, J. G. Ruby, R. Sebra, P. Peluso, J. Eid, D. Rank, J. F. Garcia, J. L. DeRisi, T. Smith, C. Tobias, J. Ross-Ibarra, I. Korf, S. W. L. Chan, Comparative analysis of tandem repeats from hundreds of species reveals unique insights into centromere evolution. *Genome Biol.* **14**, R10 (2013). [doi:10.1186/gb-2013-14-1-r10](https://doi.org/10.1186/gb-2013-14-1-r10) [Medline](#)
3. K. L. McKinley, I. M. Cheeseman, The molecular basis for centromere identity and function. *Nat. Rev. Mol. Cell Biol.* **17**, 16–29 (2016). [doi:10.1038/nrm.2015.5](https://doi.org/10.1038/nrm.2015.5) [Medline](#)
4. M. K. Rudd, G. A. Wray, H. F. Willard, The evolutionary dynamics of  $\alpha$ -satellite. *Genome Res.* **16**, 88–96 (2006). [doi:10.1101/gr.3810906](https://doi.org/10.1101/gr.3810906) [Medline](#)
5. M. Jain, S. Koren, K. H. Miga, J. Quick, A. C. Rand, T. A. Sasani, J. R. Tyson, A. D. Beggs, A. T. Dilthey, I. T. Fiddes, S. Malla, H. Marriott, T. Nieto, J. O’Grady, H. E. Olsen, B. S. Pedersen, A. Rhie, H. Richardson, A. R. Quinlan, T. P. Snutch, L. Tee, B. Paten, A. M. Phillippy, J. T. Simpson, N. J. Loman, M. Loose, Nanopore sequencing and assembly of a human genome with ultra-long reads. *Nat. Biotechnol.* **36**, 338–345 (2018). [doi:10.1038/nbt.4060](https://doi.org/10.1038/nbt.4060) [Medline](#)
6. K. H. Miga, S. Koren, A. Rhie, M. R. Vollger, A. Gershman, A. Bzikadze, S. Brooks, E. Howe, D. Porubsky, G. A. Logsdon, V. A. Schneider, T. Potapova, J. Wood, W. Chow, J. Armstrong, J. Fredrickson, E. Pak, K. Tigyi, M. Kremitzki, C. Markovic, V. Maduro, A. Dutra, G. G. Bouffard, A. M. Chang, N. F. Hansen, A. B. Wilfert, F. Thibaud-Nissen, A. D. Schmitt, J.-M. Belton, S. Selvaraj, M. Y. Dennis, D. C. Soto, R. Sahasrabudhe, G. Kaya, J. Quick, N. J. Loman, N. Holmes, M. Loose, U. Surti, R. A. Risques, T. A. Graves Lindsay, R. Fulton, I. Hall, B. Paten, K. Howe, W. Timp, A. Young, J. C. Mullikin, P. A. Pevzner, J. L. Gerton, B. A. Sullivan, E. E. Eichler, A. M. Phillippy, Telomere-to-telomere assembly of a complete human X chromosome. *Nature* **585**, 79–84 (2020). [doi:10.1038/s41586-020-2547-7](https://doi.org/10.1038/s41586-020-2547-7) [Medline](#)
7. G. A. Logsdon, M. R. Vollger, P. Hsieh, Y. Mao, M. A. Liskovykh, S. Koren, S. Nurk, L. Mercuri, P. C. Dishuck, A. Rhie, L. G. de Lima, T. Dvorkina, D. Porubsky, W. T. Harvey, A. Mikheenko, A. V. Bzikadze, M. Kremitzki, T. A. Graves-Lindsay, C. Jain, K. Hoekzema, S. C. Murali, K. M. Munson, C. Baker, M. Sorensen, A. M. Lewis, U. Surti, J. L. Gerton, V. Larionov, M. Ventura, K. H. Miga, A. M. Phillippy, E. E. Eichler, The structure, function and evolution of a complete human chromosome 8. *Nature* **593**, 101–107 (2021). [doi:10.1038/s41586-021-03420-7](https://doi.org/10.1038/s41586-021-03420-7) [Medline](#)
8. S. Nurk, S. Koren, A. Rhie, M. Rautiainen, A. V. Bzikadze, A. Mikheenko, M. R. Vollger, N. Altemose, L. Uralsky, A. Gershman, S. Aganezov, S. J. Hoyt, M. Diekhans, G. A. Logsdon, M. Alonge, S. E. Antonarakis, M. Borchers, G. G. Bouffard, S. Y. Brooks, G. V. Caldas, H. Cheng, C.-S. Chin, W. Chow, L. G. de Lima, P. C. Dishuck, R. Durbin, T. Dvorkina, I. T. Fiddes, G. Formenti, R. S. Fulton, A. Functamman, E. Garrison, P. G. S. Grady, T. A. Graves-Lindsay, I. M. Hall, N. F. Hansen, G. A. Hartley, M. Haukness, K. Howe, M. W. Hunkapiller, C. Jain, M. Jain, E. D. Jarvis, P. Kerpedjiev, M. Kirsche, M. Kolmogorov, J. Korlach, M. Kremitzki, H. Li, V. V. Maduro, T. Marschall, A. M. McCartney, J. McDaniel, D. E. Miller, J. C. Mullikin, E. W. Myers, N. D. Olson, B. Paten, P. Peluso, P. A. Pevzner, D. Porubsky, T. Potapova,

- E. I. Rogaev, J. A. Rosenfeld, S. L. Salzberg, V. A. Schneider, F. J. Sedlazeck, K. Shafin, C. J. Shew, A. Shumate, Y. Sims, A. F. A. Smit, D. C. Soto, I. Sović, J. M. Storer, A. Streets, B. A. Sullivan, F. Thibaud-Nissen, J. Torrance, J. Wagner, B. P. Walenz, A. Wenger, J. M. D. Wood, C. Xiao, S. M. Yan, A. C. Young, S. Zarate, U. Surti, R. C. McCoy, M. Y. Dennis, I. A. Alexandrov, J. L. Gerton, R. J. O'Neill, W. Timp, J. M. Zook, M. C. Schatz, E. E. Eichler, K. H. Miga, A. M. Phillippy, The complete sequence of a human genome. *bioRxiv* 2021.05.26.445798 [Preprint] (2021). <https://doi.org/10.1101/2021.05.26.445798>.
9. Arabidopsis Genome Initiative, Analysis of the genome sequence of the flowering plant *Arabidopsis thaliana*. *Nature* **408**, 796–815 (2000). [doi:10.1038/35048692](https://doi.org/10.1038/35048692) [Medline](#)
  10. S. Maheshwari, T. Ishii, C. T. Brown, A. Houben, L. Comai, Centromere location in *Arabidopsis* is unaltered by extreme divergence in CENH3 protein sequence. *Genome Res.* **27**, 471–478 (2017). [doi:10.1101/gr.214619.116](https://doi.org/10.1101/gr.214619.116) [Medline](#)
  11. G. P. Copenhaver, K. Nickel, T. Kuromori, M.-I. Benito, S. Kaul, X. Lin, M. Bevan, G. Murphy, B. Harris, L. D. Parnell, W. R. McCombie, R. A. Martienssen, M. Marra, D. Preuss, Genetic definition and sequence analysis of *Arabidopsis* centromeres. *Science* **286**, 2468–2474 (1999). [doi:10.1126/science.286.5449.2468](https://doi.org/10.1126/science.286.5449.2468) [Medline](#)
  12. P. B. Talbert, R. Masuelli, A. P. Tyagi, L. Comai, S. Henikoff, Centromeric localization and adaptive evolution of an *Arabidopsis* histone H3 variant. *Plant Cell* **14**, 1053–1066 (2002). [doi:10.1105/tpc.010425](https://doi.org/10.1105/tpc.010425) [Medline](#)
  13. J. M. Martinez-Zapater, M. A. Estelle, C. R. Somerville, A highly repeated DNA sequence in *Arabidopsis thaliana*. *Mol. Gen. Genet.* **204**, 417–423 (1986). [doi:10.1007/BF00331018](https://doi.org/10.1007/BF00331018)
  14. E. K. Round, S. K. Flowers, E. J. Richards, *Arabidopsis thaliana* centromere regions: Genetic map positions and repetitive DNA structure. *Genome Res.* **7**, 1045–1053 (1997). [doi:10.1101/gr.7.11.1045](https://doi.org/10.1101/gr.7.11.1045) [Medline](#)
  15. A. M. McCartney, K. Shafin, M. Alonge, A. V. Bzikadze, G. Formenti, A. Fungtammasan, K. Howe, C. Jain, S. Koren, G. A. Logsdon, K. H. Miga, A. Mikheenko, B. Paten, A. Shumate, D. C. Soto, I. Sović, J. M. D. Wood, J. M. Zook, A. M. Phillippy, A. Rhie, Chasing perfection: validation and polishing strategies for telomere-to-telomere genome assemblies. *bioRxiv* 2021.07.02.450803 [Preprint] (2021). <https://doi.org/10.1101/2021.07.02.450803>.
  16. T. Hosouchi, N. Kumekawa, H. Tsuruoka, H. Kotani, Physical map-based sizes of the centromeric regions of *Arabidopsis thaliana* chromosomes 1, 2, and 3. *DNA Res.* **9**, 117–121 (2002). [doi:10.1093/dnares/9.4.117](https://doi.org/10.1093/dnares/9.4.117) [Medline](#)
  17. A. Rhie, B. P. Walenz, S. Koren, A. M. Phillippy, Merqury: Reference-free quality, completeness, and phasing assessment for genome assemblies. *Genome Biol.* **21**, 245 (2020). [doi:10.1186/s13059-020-02134-9](https://doi.org/10.1186/s13059-020-02134-9) [Medline](#)
  18. D. A. Wright, D. F. Voytas, *Athila4* of *Arabidopsis* and *Calypso* of soybean define a lineage of endogenous plant retroviruses. *Genome Res.* **12**, 122–131 (2002). [doi:10.1101/gr.196001](https://doi.org/10.1101/gr.196001) [Medline](#)
  19. B. F. McAllister, J. H. Werren, Evolution of tandemly repeated sequences: What happens at the end of an array? *J. Mol. Evol.* **48**, 469–481 (1999). [doi:10.1007/PL00006491](https://doi.org/10.1007/PL00006491) [Medline](#)
  20. P. Ni, N. Huang, F. Nie, J. Zhang, Z. Zhang, B. Wu, L. Bai, W. Liu, C.-L. Xiao, F. Luo, J.

- Wang, Genome-wide detection of cytosine methylations in plant from nanopore sequencing data using deep learning. bioRxiv 2021.02.07.430077 [Preprint] (2021). <https://doi.org/10.1101/2021.02.07.430077>.
21. H. Stroud, T. Do, J. Du, X. Zhong, S. Feng, L. Johnson, D. J. Patel, S. E. Jacobsen, Non-CG methylation patterns shape the epigenetic landscape in *Arabidopsis*. *Nat. Struct. Mol. Biol.* **21**, 64–72 (2014). [doi:10.1038/nsmb.2735](https://doi.org/10.1038/nsmb.2735) [Medline](#)
  22. H. Stroud, M. V. C. Greenberg, S. Feng, Y. V. Bernatavichute, S. E. Jacobsen, Comprehensive analysis of silencing mutants reveals complex regulation of the *Arabidopsis* methylome. *Cell* **152**, 352–364 (2013). [doi:10.1016/j.cell.2012.10.054](https://doi.org/10.1016/j.cell.2012.10.054) [Medline](#)
  23. Y. Jacob, S. Feng, C. A. LeBlanc, Y. V. Bernatavichute, H. Stroud, S. Cokus, L. M. Johnson, M. Pellegrini, S. E. Jacobsen, S. D. Michaels, ATXR5 and ATXR6 are H3K27 monomethyltransferases required for chromatin structure and gene silencing. *Nat. Struct. Mol. Biol.* **16**, 763–768 (2009). [doi:10.1038/nsmb.1611](https://doi.org/10.1038/nsmb.1611) [Medline](#)
  24. R. Yelagandula, H. Stroud, S. Holec, K. Zhou, S. Feng, X. Zhong, U. M. Muthurajan, X. Nie, T. Kawashima, M. Groth, K. Luger, S. E. Jacobsen, F. Berger, The histone variant H2A.W defines heterochromatin and promotes chromatin condensation in *Arabidopsis*. *Cell* **158**, 98–109 (2014). [doi:10.1016/j.cell.2014.06.006](https://doi.org/10.1016/j.cell.2014.06.006) [Medline](#)
  25. J. Shi, S. E. Wolf, J. M. Burke, G. G. Presting, J. Ross-Ibarra, R. K. Dawe, Widespread gene conversion in centromere cores. *PLoS Biol.* **8**, e1000327 (2010). [doi:10.1371/journal.pbio.1000327](https://doi.org/10.1371/journal.pbio.1000327) [Medline](#)
  26. C. Lambing, A. J. Tock, S. D. Topp, K. Choi, P. C. Kuo, X. Zhao, K. Osman, J. D. Higgins, F. C. H. Franklin, I. R. Henderson, Interacting genomic landscapes of REC8-cohesin, chromatin, and meiotic recombination in *Arabidopsis*. *Plant Cell* **32**, 1218–1239 (2020). [doi:10.1105/tpc.19.00866](https://doi.org/10.1105/tpc.19.00866) [Medline](#)
  27. C. Lambing, P. C. Kuo, A. J. Tock, S. D. Topp, I. R. Henderson, ASY1 acts as a dosage-dependent antagonist of telomere-led recombination and mediates crossover interference in *Arabidopsis*. *Proc. Natl. Acad. Sci. U.S.A.* **117**, 13647–13658 (2020). [doi:10.1073/pnas.1921055117](https://doi.org/10.1073/pnas.1921055117) [Medline](#)
  28. K. Choi, X. Zhao, A. J. Tock, C. Lambing, C. J. Underwood, T. J. Hardcastle, H. Serra, J. Kim, H. S. Cho, J. Kim, P. A. Ziolkowski, N. E. Yelina, I. Hwang, R. A. Martienssen, I. R. Henderson, Nucleosomes and DNA methylation shape meiotic DSB frequency in *Arabidopsis thaliana* transposons and gene regulatory regions. *Genome Res.* **28**, 532–546 (2018). [doi:10.1101/gr.225599.117](https://doi.org/10.1101/gr.225599.117) [Medline](#)
  29. M. Rigal, C. Becker, T. Pélissier, R. Pogorelnik, J. Devos, Y. Ikeda, D. Weigel, O. Mathieu, Epigenome confrontation triggers immediate reprogramming of DNA methylation and transposon silencing in *Arabidopsis thaliana* F1 epihybrids. *Proc. Natl. Acad. Sci. U.S.A.* **113**, E2083–E2092 (2016). [doi:10.1073/pnas.1600672113](https://doi.org/10.1073/pnas.1600672113) [Medline](#)
  30. A. Steimer, P. Amedeo, K. Afsar, P. Frasz, O. Mittelsten Scheid, J. Paszkowski, Endogenous targets of transcriptional gene silencing in *Arabidopsis*. *Plant Cell* **12**, 1165–1178 (2000). [doi:10.1105/tpc.12.7.1165](https://doi.org/10.1105/tpc.12.7.1165) [Medline](#)
  31. S. C. Lee, E. Ernst, B. Berube, F. Borges, J.-S. Parent, P. Ledon, A. Schorn, R. A. Martienssen, *Arabidopsis* retrotransposon virus-like particles and their regulation by epigenetically activated small RNA. *Genome Res.* **30**, 576–588 (2020).



[doi:10.1101/gr.259044.119](https://doi.org/10.1101/gr.259044.119) [Medline](#)

32. A. Rhie, S. A. McCarthy, O. Fedrigo, J. Damas, G. Formenti, S. Koren, M. Uliano-Silva, W. Chow, A. Functammasan, J. Kim, C. Lee, B. J. Ko, M. Chaisson, G. L. Gedman, L. J. Cantin, F. Thibaud-Nissen, L. Haggerty, I. Bista, M. Smith, B. Haase, J. Mountcastle, S. Winkler, S. Paez, J. Howard, S. C. Vernes, T. M. Lama, F. Grutzner, W. C. Warren, C. N. Balakrishnan, D. Burt, J. M. George, M. T. Biegler, D. Iorns, A. Digby, D. Eason, B. Robertson, T. Edwards, M. Wilkinson, G. Turner, A. Meyer, A. F. Kautt, P. Franchini, H. W. Detrich III, H. Svoldal, M. Wagner, G. J. P. Naylor, M. Pippel, M. Malinsky, M. Mooney, M. Simbirsky, B. T. Hannigan, T. Pesout, M. Houck, A. Misuraca, S. B. Kingan, R. Hall, Z. Kronenberg, I. Sović, C. Dunn, Z. Ning, A. Hastie, J. Lee, S. Selvaraj, R. E. Green, N. H. Putnam, I. Gut, J. Ghurye, E. Garrison, Y. Sims, J. Collins, S. Pelan, J. Torrance, A. Tracey, J. Wood, R. E. Dagneu, D. Guan, S. E. London, D. F. Clayton, C. V. Mello, S. R. Friedrich, P. V. Lovell, E. Osipova, F. O. Al-Ajli, S. Secomandi, H. Kim, C. Theofanopoulou, M. Hiller, Y. Zhou, R. S. Harris, K. D. Makova, P. Medvedev, J. Hoffman, P. Masterson, K. Clark, F. Martin, K. Howe, P. Flicek, B. P. Walenz, W. Kwak, H. Clawson, M. Diekhans, L. Nassar, B. Paten, R. H. S. Kraus, A. J. Crawford, M. T. P. Gilbert, G. Zhang, B. Venkatesh, R. W. Murphy, K.-P. Koepfli, B. Shapiro, W. E. Johnson, F. Di Palma, T. Marques-Bonet, E. C. Teeling, T. Warnow, J. M. Graves, O. A. Ryder, D. Haussler, S. J. O'Brien, J. Korlach, H. A. Lewin, K. Howe, E. W. Myers, R. Durbin, A. M. Phillippy, E. D. Jarvis, Towards complete and error-free genome assemblies of all vertebrate species. *Nature* **592**, 737–746 (2021). [doi:10.1038/s41586-021-03451-0](https://doi.org/10.1038/s41586-021-03451-0) [Medline](#)
33. E. Wijnker, G. Velikkakam James, J. Ding, F. Becker, J. R. Klasen, V. Rawat, B. A. Rowan, D. F. de Jong, C. B. de Snoo, L. Zapata, B. Huettel, H. de Jong, S. Ossowski, D. Weigel, M. Koornneef, J. J. B. Keurentjes, K. Schneeberger, The genomic landscape of meiotic crossovers and gene conversions in *Arabidopsis thaliana*. *eLife* **2**, e01426 (2013). [doi:10.7554/eLife.01426](https://doi.org/10.7554/eLife.01426) [Medline](#)
34. S. J. Durfy, H. F. Willard, Patterns of intra- and interarray sequence variation in alpha satellite from the human X chromosome: Evidence for short-range homogenization of tandemly repeated DNA sequences. *Genomics* **5**, 810–821 (1989). [doi:10.1016/0888-7543\(89\)90123-7](https://doi.org/10.1016/0888-7543(89)90123-7) [Medline](#)
35. N. Altemose, G. A. Logsdon, A. V. Bzikadze, P. Sidhwani, S. A. Langley, G. V. Caldas, S. J. Hoyt, L. Uralsky, F. D. Ryabov, C. J. Shew, M. E. G. Sauria, M. Borchers, A. Gershman, A. Mikheenko, V. A. Shepelev, T. Dvorkina, O. Kunyavskaya, M. R. Vollger, A. Rhie, A. M. McCartney, M. Asri, R. Lorig-Roach, K. Shafin, S. Aganezov, D. Olson, L. Gomes de Lima, T. Potapova, G. A. Hartley, M. Haukness, P. Kerpedjiev, F. Gusev, K. Tigyi, S. Brooks, A. Young, S. Nurk, S. Koren, S. R. Salama, B. Paten, E. I. Rogaev, A. Streets, G. H. Karpen, A. F. Dernburg, B. A. Sullivan, A. F. Straight, T. J. Wheeler, J. L. Gerton, E. E. Eichler, A. M. Phillippy, W. Timp, M. Y. Dennis, R. J. O'Neill, J. M. Zook, M. C. Schatz, P. A. Pevzner, M. Diekhans, C. H. Langley, I. A. Alexandrov, K. H. Miga, Complete genomic and epigenetic maps of human centromeres. bioRxiv 2021.07.12.452052 [Preprint] (2021). <https://doi.org/10.1101/2021.07.12.452052>.
36. M. M. Mahtani, H. F. Willard, Physical and genetic mapping of the human X chromosome centromere: Repression of recombination. *Genome Res.* **8**, 100–110 (1998). [doi:10.1101/gr.8.2.100](https://doi.org/10.1101/gr.8.2.100) [Medline](#)

37. S. Tsukahara, A. Kawabe, A. Kobayashi, T. Ito, T. Aizu, T. Shin-i, A. Toyoda, A. Fujiyama, Y. Tarutani, T. Kakutani, Centromere-targeted de novo integrations of an LTR retrotransposon of *Arabidopsis lyrata*. *Genes Dev.* **26**, 705–713 (2012). [doi:10.1101/gad.183871.111](https://doi.org/10.1101/gad.183871.111) [Medline](#)
38. A. Kawabe, S. Nasuda, Structure and genomic organization of centromeric repeats in *Arabidopsis* species. *Mol. Genet. Genomics* **272**, 593–602 (2005). [doi:10.1007/s00438-004-1081-x](https://doi.org/10.1007/s00438-004-1081-x) [Medline](#)
39. S. J. Klein, R. J. O’Neill, Transposable elements: Genome innovation, chromosome diversity, and centromere conflict. *Chromosome Res.* **26**, 5–23 (2018). [doi:10.1007/s10577-017-9569-5](https://doi.org/10.1007/s10577-017-9569-5) [Medline](#)
40. H. S. Malik, The centromere-drive hypothesis: A simple basis for centromere complexity. *Prog. Mol. Subcell. Biol.* **48**, 33–52 (2009). [doi:10.1007/978-3-642-00182-6\\_2](https://doi.org/10.1007/978-3-642-00182-6_2) [Medline](#)
41. D. Haig, A. Grafen, Genetic scrambling as a defence against meiotic drive. *J. Theor. Biol.* **153**, 531–558 (1991). [doi:10.1016/S0022-5193\(05\)80155-9](https://doi.org/10.1016/S0022-5193(05)80155-9) [Medline](#)
42. M. Kolmogorov, J. Yuan, Y. Lin, P. A. Pevzner, Assembly of long, error-prone reads using repeat graphs. *Nat. Biotechnol.* **37**, 540–546 (2019). [doi:10.1038/s41587-019-0072-8](https://doi.org/10.1038/s41587-019-0072-8) [Medline](#)
43. S. Sato, Y. Nakamura, T. Kaneko, E. Asamizu, S. Tabata, Complete structure of the chloroplast genome of *Arabidopsis thaliana*. *DNA Res.* **6**, 283–290 (1999). [doi:10.1093/dnares/6.5.283](https://doi.org/10.1093/dnares/6.5.283) [Medline](#)
44. D. B. Sloan, Z. Wu, J. Sharbrough, Correction of persistent errors in *Arabidopsis* reference mitochondrial genomes. *Plant Cell* **30**, 525–527 (2018). [doi:10.1105/tpc.18.00024](https://doi.org/10.1105/tpc.18.00024) [Medline](#)
45. H. Li, Minimap2: Pairwise alignment for nucleotide sequences. *Bioinformatics* **34**, 3094–3100 (2018). [doi:10.1093/bioinformatics/bty191](https://doi.org/10.1093/bioinformatics/bty191) [Medline](#)
46. A. Morgulis, E. M. Gertz, A. A. Schäffer, R. Agarwala, WindowMasker: Window-based masker for sequenced genomes. *Bioinformatics* **22**, 134–141 (2006). [doi:10.1093/bioinformatics/bti774](https://doi.org/10.1093/bioinformatics/bti774) [Medline](#)
47. A. Morgulis, G. Coulouris, Y. Raytselis, T. L. Madden, R. Agarwala, A. A. Schäffer, Database indexing for production MegaBLAST searches. *Bioinformatics* **24**, 1757–1764 (2008). [doi:10.1093/bioinformatics/btn322](https://doi.org/10.1093/bioinformatics/btn322) [Medline](#)
48. D. Guan, S. A. McCarthy, J. Wood, K. Howe, Y. Wang, R. Durbin, Identifying and removing haplotypic duplication in primary genome assemblies. *Bioinformatics* **36**, 2896–2898 (2020). [doi:10.1093/bioinformatics/btaa025](https://doi.org/10.1093/bioinformatics/btaa025) [Medline](#)
49. S. Kurtz, A. Phillippy, A. L. Delcher, M. Smoot, M. Shumway, C. Antonescu, S. L. Salzberg, Versatile and open software for comparing large genomes. *Genome Biol.* **5**, R12 (2004). [doi:10.1186/gb-2004-5-2-r12](https://doi.org/10.1186/gb-2004-5-2-r12) [Medline](#)
50. M. Alonge, S. Soyk, S. Ramakrishnan, X. Wang, S. Goodwin, F. J. Sedlazeck, Z. B. Lippman, M. C. Schatz, RaGOO: Fast and accurate reference-guided scaffolding of draft genomes. *Genome Biol.* **20**, 224 (2019). [doi:10.1186/s13059-019-1829-6](https://doi.org/10.1186/s13059-019-1829-6) [Medline](#)
51. R. Poplin, P.-C. Chang, D. Alexander, S. Schwartz, T. Colthurst, A. Ku, D. Newburger, J. Dijamco, N. Nguyen, P. T. Afshar, S. S. Gross, L. Dorfman, C. Y. McLean, M. A.

- DePristo, A universal SNP and small-indel variant caller using deep neural networks. *Nat. Biotechnol.* **36**, 983–987 (2018). [doi:10.1038/nbt.4235](https://doi.org/10.1038/nbt.4235) [Medline](#)
52. H. Li, Aligning sequence reads, clone sequences and assembly contigs with BWA-MEM. [arXiv:1303.3997](https://arxiv.org/abs/1303.3997) [q-bio.GN] (2013).
53. H. Li, B. Handsaker, A. Wysoker, T. Fennell, J. Ruan, N. Homer, G. Marth, G. Abecasis, R. Durbin, 1000 Genome Project Data Processing Subgroup, The Sequence Alignment/Map format and SAMtools. *Bioinformatics* **25**, 2078–2079 (2009). [doi:10.1093/bioinformatics/btp352](https://doi.org/10.1093/bioinformatics/btp352) [Medline](#)
54. P. Danecek, J. K. Bonfield, J. Liddle, J. Marshall, V. Ohan, M. O. Pollard, A. Whitwham, T. Keane, S. A. McCarthy, R. M. Davies, H. Li, Twelve years of SAMtools and BCFtools. *Gigascience* **10**, giab008 (2021). [doi:10.1093/gigascience/giab008](https://doi.org/10.1093/gigascience/giab008) [Medline](#)
55. A. R. Quinlan, I. M. Hall, BEDTools: A flexible suite of utilities for comparing genomic features. *Bioinformatics* **26**, 841–842 (2010). [doi:10.1093/bioinformatics/btq033](https://doi.org/10.1093/bioinformatics/btq033) [Medline](#)
56. C. Jain, A. Rhie, H. Zhang, C. Chu, B. P. Walenz, S. Koren, A. M. Phillippy, Weighted minimizer sampling improves long read mapping. *Bioinformatics* **36**, i111–i118 (2020). [doi:10.1093/bioinformatics/btaa435](https://doi.org/10.1093/bioinformatics/btaa435) [Medline](#)
57. B. Langmead, C. Trapnell, M. Pop, S. L. Salzberg, Ultrafast and memory-efficient alignment of short DNA sequences to the human genome. *Genome Biol.* **10**, R25 (2009). [doi:10.1186/gb-2009-10-3-r25](https://doi.org/10.1186/gb-2009-10-3-r25) [Medline](#)
58. F. J. Sedlazeck, P. Rescheneder, M. Smolka, H. Fang, M. Nattestad, A. von Haeseler, M. C. Schatz, Accurate detection of complex structural variations using single-molecule sequencing. *Nat. Methods* **15**, 461–468 (2018). [doi:10.1038/s41592-018-0001-7](https://doi.org/10.1038/s41592-018-0001-7) [Medline](#)
59. M. Alonge, X. Wang, M. Benoit, S. Soyk, L. Pereira, L. Zhang, H. Suresh, S. Ramakrishnan, F. Maumus, D. Ciren, Y. Levy, T. H. Harel, G. Shalev-Schlosser, Z. Amsellem, H. Razifard, A. L. Caicedo, D. M. Tieman, H. Klee, M. Kirsche, S. Aganezov, T. R. Ranallo-Benavidez, Z. H. Lemmon, J. Kim, G. Robitaille, M. Kramer, S. Goodwin, W. R. McCombie, S. Hutton, J. Van Eck, J. Gillis, Y. Eshed, F. J. Sedlazeck, E. van der Knaap, M. C. Schatz, Z. B. Lippman, Major impacts of widespread structural variation on gene expression and crop improvement in tomato. *Cell* **182**, 145–161.e23 (2020). [doi:10.1016/j.cell.2020.05.021](https://doi.org/10.1016/j.cell.2020.05.021) [Medline](#)
60. R. Vaser, I. Sović, N. Nagarajan, M. Šikić, Fast and accurate de novo genome assembly from long uncorrected reads. *Genome Res.* **27**, 737–746 (2017). [doi:10.1101/gr.214270.116](https://doi.org/10.1101/gr.214270.116) [Medline](#)
61. G. Formenti, A. Rhie, B. P. Walenz, F. Thibaud-Nissen, K. Shafin, S. Koren, E. W. Myers, E. D. Jarvis, A. M. Phillippy, Merfin: improved variant filtering and polishing via k-mer validation. *bioRxiv* 2021.07.16.452324 [Preprint] (2021). <https://doi.org/10.1101/2021.07.16.452324>.
62. H. Li, R. Durbin, Fast and accurate short read alignment with Burrows-Wheeler transform. *Bioinformatics* **25**, 1754–1760 (2009). [doi:10.1093/bioinformatics/btp324](https://doi.org/10.1093/bioinformatics/btp324) [Medline](#)
63. N. Abdennur, L. A. Mirny, Cooler: Scalable storage for Hi-C data and other genomically labeled arrays. *Bioinformatics* **36**, 311–316 (2020). [doi:10.1093/bioinformatics/btz540](https://doi.org/10.1093/bioinformatics/btz540) [Medline](#)

64. A. Shumate, S. L. Salzberg, Liftoff: Accurate mapping of gene annotations. *Bioinformatics* **37**, 1639–1643 (2021). [doi:10.1093/bioinformatics/btaa1016](https://doi.org/10.1093/bioinformatics/btaa1016) [Medline](#)
65. S. Ou, W. Su, Y. Liao, K. Chougule, J. R. A. Agda, A. J. Hellings, C. S. B. Lugo, T. A. Elliott, D. Ware, T. Peterson, N. Jiang, C. N. Hirsch, M. B. Hufford, Benchmarking transposable element annotation methods for creation of a streamlined, comprehensive pipeline. *Genome Biol.* **20**, 275 (2019). [doi:10.1186/s13059-019-1905-y](https://doi.org/10.1186/s13059-019-1905-y) [Medline](#)
66. N. Buisine, H. Quesneville, V. Colot, Improved detection and annotation of transposable elements in sequenced genomes using multiple reference sequence sets. *Genomics* **91**, 467–475 (2008). [doi:10.1016/j.ygeno.2008.01.005](https://doi.org/10.1016/j.ygeno.2008.01.005) [Medline](#)
67. K. D. Yamada, K. Tomii, K. Katoh, Application of the MAFFT sequence alignment program to large data-reexamination of the usefulness of chained guide trees. *Bioinformatics* **32**, 3246–3251 (2016). [doi:10.1093/bioinformatics/btw412](https://doi.org/10.1093/bioinformatics/btw412) [Medline](#)
68. D. Ellinghaus, S. Kurtz, U. Willhoeft, LTRharvest, an efficient and flexible software for de novo detection of LTR retrotransposons. *BMC Bioinformatics* **9**, 18 (2008). [doi:10.1186/1471-2105-9-18](https://doi.org/10.1186/1471-2105-9-18) [Medline](#)
69. K. Katoh, D. M. Standley, MAFFT multiple sequence alignment software version 7: Improvements in performance and usability. *Mol. Biol. Evol.* **30**, 772–780 (2013). [doi:10.1093/molbev/mst010](https://doi.org/10.1093/molbev/mst010) [Medline](#)
70. P. Rice, I. Longden, A. Bleasby, EMBOSS: The European Molecular Biology Open Software Suite. *Trends Genet.* **16**, 276–277 (2000). [doi:10.1016/S0168-9525\(00\)02024-2](https://doi.org/10.1016/S0168-9525(00)02024-2) [Medline](#)
71. K. Liu, C. R. Linder, T. Warnow, RAxML and FastTree: Comparing two methods for large-scale maximum likelihood phylogeny estimation. *PLOS ONE* **6**, e27731 (2011). [doi:10.1371/journal.pone.0027731](https://doi.org/10.1371/journal.pone.0027731) [Medline](#)
72. M. Martin, Cutadapt removes adapter sequences from high-throughput sequencing reads. *EMBnet. J.* **17**, 10 (2011). [doi:10.14806/ej.17.1.200](https://doi.org/10.14806/ej.17.1.200)
73. B. Langmead, S. L. Salzberg, Fast gapped-read alignment with Bowtie 2. *Nat. Methods* **9**, 357–359 (2012). [doi:10.1038/nmeth.1923](https://doi.org/10.1038/nmeth.1923) [Medline](#)
74. F. Ramírez, F. Dünder, S. Diehl, B. A. Grüning, T. Manke, deepTools: A flexible platform for exploring deep-sequencing data. *Nucleic Acids Res.* **42**, W187–W191 (2014). [doi:10.1093/nar/gku365](https://doi.org/10.1093/nar/gku365) [Medline](#)
75. A. M. Bolger, M. Lohse, B. Usadel, Trimmomatic: A flexible trimmer for Illumina sequence data. *Bioinformatics* **30**, 2114–2120 (2014). [doi:10.1093/bioinformatics/btu170](https://doi.org/10.1093/bioinformatics/btu170) [Medline](#)
76. A. Dobin, C. A. Davis, F. Schlesinger, J. Drenkow, C. Zaleski, S. Jha, P. Batut, M. Chaisson, T. R. Gingeras, STAR: Ultrafast universal RNA-seq aligner. *Bioinformatics* **29**, 15–21 (2013). [doi:10.1093/bioinformatics/bts635](https://doi.org/10.1093/bioinformatics/bts635) [Medline](#)
77. B. Bushnell, R. Egan, A. Copeland, B. Foster, A. Clum, H. Sun, BBMap: a fast, accurate, splice-aware aligner (2014); <https://sourceforge.net/projects/bbmap/>.
78. F. Krueger, Trim galore. A wrapper tool around Cutadapt and FastQC to consistently apply quality and adapter trimming to FastQ files; <https://github.com/FelixKrueger/TrimGalore>.
79. F. Krueger, S. R. Andrews, Bismark: A flexible aligner and methylation caller for

- Bisulfite-Seq applications. *Bioinformatics* **27**, 1571–1572 (2011).  
[doi:10.1093/bioinformatics/btr167](https://doi.org/10.1093/bioinformatics/btr167) [Medline](#)
80. B. A. Rowan, V. Patel, D. Weigel, K. Schneeberger, Rapid and inexpensive whole-genome genotyping-by-sequencing for crossover localization and fine-scale genetic mapping. *G3* **5**, 385–398 (2015). [doi:10.1534/g3.114.016501](https://doi.org/10.1534/g3.114.016501) [Medline](#)
81. T. Mandáková, M. A. Lysak, Chromosome preparation for cytogenetic analyses in *Arabidopsis*. *Curr. Protoc. Plant Biol.* **1**, 43–51 (2016). [doi:10.1002/cppb.20009](https://doi.org/10.1002/cppb.20009) [Medline](#)
82. J. W. IJdo, R. A. Wells, A. Baldini, S. T. Reeders, Improved telomere detection using a telomere repeat probe (TTAGGG)<sub>n</sub> generated by PCR. *Nucleic Acids Res.* **19**, 4780 (1991). [doi:10.1093/nar/19.17.4780](https://doi.org/10.1093/nar/19.17.4780) [Medline](#)
83. K. Nagaki, P. B. Talbert, C. X. Zhong, R. K. Dawe, S. Henikoff, J. Jiang, Chromatin immunoprecipitation reveals that the 180-bp satellite repeat is the key functional DNA element of *Arabidopsis thaliana* centromeres. *Genetics* **163**, 1221–1225 (2003).  
[doi:10.1093/genetics/163.3.1221](https://doi.org/10.1093/genetics/163.3.1221) [Medline](#)
84. M. Ravi, S. W. L. Chan, Haploid plants produced by centromere-mediated genome elimination. *Nature* **464**, 615–618 (2010). [doi:10.1038/nature08842](https://doi.org/10.1038/nature08842) [Medline](#)
85. S. J. Armstrong, G. H. Jones, Meiotic cytology and chromosome behaviour in wild-type *Arabidopsis thaliana*. *J. Exp. Bot.* **54**, 1–10 (2003). [doi:10.1093/jxb/erg034](https://doi.org/10.1093/jxb/erg034) [Medline](#)
86. J. D. Higgins, E. Sanchez-Moran, S. J. Armstrong, G. H. Jones, F. C. H. Franklin, The *Arabidopsis* synaptonemal complex protein ZYP1 is required for chromosome synapsis and normal fidelity of crossing over. *Genes Dev.* **19**, 2488–2500 (2005).  
[doi:10.1101/gad.354705](https://doi.org/10.1101/gad.354705) [Medline](#)
87. B. Zhu, W. Zhang, T. Zhang, B. Liu, J. Jiang, Genome-wide prediction and validation of intergenic enhancers in *Arabidopsis* using open chromatin signatures. *Plant Cell* **27**, 2415–2426 (2015). [doi:10.1105/tpc.15.00537](https://doi.org/10.1105/tpc.15.00537) [Medline](#)
88. H. Serra, C. Lambing, C. H. Griffin, S. D. Topp, D. C. Nageswaran, C. J. Underwood, P. A. Ziolkowski, M. Séguéla-Arnaud, J. B. Fernandes, R. Mercier, I. R. Henderson, Massive crossover elevation via combination of *HEI10* and *recq4a recq4b* during *Arabidopsis* meiosis. *Proc. Natl. Acad. Sci. U.S.A.* **115**, 2437–2442 (2018).  
[doi:10.1073/pnas.1713071115](https://doi.org/10.1073/pnas.1713071115) [Medline](#)
89. C. J. Underwood, K. Choi, C. Lambing, X. Zhao, H. Serra, F. Borges, J. Simorowski, E. Ernst, Y. Jacob, I. R. Henderson, R. A. Martienssen, Epigenetic activation of meiotic recombination near *Arabidopsis thaliana* centromeres via loss of H3K9me2 and non-CG DNA methylation. *Genome Res.* **28**, 519–531 (2018). [doi:10.1101/gr.227116.117](https://doi.org/10.1101/gr.227116.117) [Medline](#)
90. Feng, S. J. Cokus, V. Schubert, J. Zhai, M. Pellegrini, S. E. Jacobsen, Genome-wide Hi-C analyses in wild-type and mutants reveal high-resolution chromatin interactions in *Arabidopsis*. *Mol. Cell* **55**, 694–707 (2014). [doi:10.1016/j.molcel.2014.07.008](https://doi.org/10.1016/j.molcel.2014.07.008) [Medline](#)
91. N. Kumekawa, T. Hosouchi, H. Tsuruoka, H. Kotani, The size and sequence organization of the centromeric region of *Arabidopsis thaliana* chromosome 5. *DNA Res.* **7**, 315–321 (2000). [doi:10.1093/dnares/7.6.315](https://doi.org/10.1093/dnares/7.6.315) [Medline](#)
92. N. Kumekawa, T. Hosouchi, H. Tsuruoka, H. Kotani, The size and sequence organization

of the centromeric region of *Arabidopsis thaliana* chromosome 4. *DNA Res.* **8**, 285–290 (2001). [doi:10.1093/dnares/8.6.285](https://doi.org/10.1093/dnares/8.6.285) [Medline](#)

93. C. Pockrandt, M. Alzamel, C. S. Iliopoulos, K. Reinert, GenMap: Ultra-fast computation of genome mappability. *Bioinformatics* **36**, 3687–3692 (2020). [doi:10.1093/bioinformatics/btaa222](https://doi.org/10.1093/bioinformatics/btaa222) [Medline](#)

94. J. M. Keith, *Bioinformatics: Volume I: Data, Sequence Analysis, and Evolution* (Humana, 2018).
